# Supplementary material for: Assessment on latitudinal tree species richness using environmental factors in the southeastern United States
Source: PeerJ. 2019 Apr 17;7:e6781. doi: 10.7717/peerj.6781 (PMC6475148; doi:10.7717/peerj.6781)
Supplement: Dataset S1 [file peerj-07-6781-s001.csv]

Grid_ID	SppRichness	Count/Forested Area	WaterTableDepth	AvailableWaterStorage	HydrologicGroup	MeanTemp	TempSeasonality	AnnualPrecip	PrecipSeasonality	SPEI1994-1999	SPEI1999-2004	SPI1994-1999	SPI1999-2004
176	10	2	4.615880354	11.14250016	7	244.5789474	3016.842105	1244.881579	56.27631579	-1.401643133	1.079615211	-0.889450371	1.651134729
219	1	1	0.400071361	17.27245916	4	238.2539683	3186.748016	1364.972222	61.14285714	-1.334040008	0.610885996	-1.507750764	1.810466573
220	3	1	0.770861179	25.107679	6	240.3293769	3106.937685	1379.795252	59.64391691	-1.16414664	0.481328552	-0.998487393	1.574671129
263	3	2	0.251003658	3.632199949	7	235.9441233	3240.815029	1475.1079	61.28131021	-1.468217425	0.618240504	-1.366618514	1.744112737
264	4	1	0.720075881	11.19965948	4	237.9268293	3151.745011	1495.394678	60.81152993	-1.273565173	0.577794584	-1.089261238	1.516807415
345	13	10	1.396875678	19.24331042	2	233.8655257	3582.381418	1306.647922	67.20293399	-1.064953173	0.1650563	-0.556125833	1.040859889
346	16	8	1.858788545	15.71038549	2	233.1033138	3578.945419	1328.920078	67.81091618	-1.16092298	0.13818319	-0.775422338	1.050468013
347	19	11	1.011310376	11.80316175	2	232.7038462	3567.203846	1341.692308	67.50961538	-1.186147699	0.071185904	-0.720151445	1.127471212
351	1	1	0.283666402	27.98317809	2	237.0884615	3295.048077	1445.396154	55.80576923	-1.335924661	0.482715698	-0.824252039	1.737549514
352	1	2	1.102267256	7.808687729	2	240.2639692	3152.749518	1402.514451	51.42003854	-1.663194591	0.675687999	-0.999915823	1.897249535
388	3	2	1.318601347	12.17742271	2	233.5433071	3674.76378	1313.15748	67.06299213	-1.204804659	-0.359122373	-0.662536422	0.654582143
389	8	12	1.29516304	10.03219689	2	232.8623327	3657.760994	1321.342256	67.04206501	-1.323161662	-0.05057072	-0.653132552	0.867818717
390	16	14	1.154730111	7.314225053	2	231.8131021	3654.728324	1334.396917	66.68400771	-1.410243414	0.27617843	-0.827397861	1.260286935
391	10	9	1.075431762	7.736734789	4	231.4261036	3629.381958	1341.604607	65.756238	-1.370209545	0.337403566	-0.744036111	1.573509198
393	6	7	0.351137494	3.472963068	2	232.9	3524.532692	1369.078846	60.86538462	-1.243602015	0.758039732	-0.667155523	1.878112257
395	1	1	0.252887025	19.77233389	2	236.5134615	3329.575	1466.128846	53.07692308	-1.238139331	0.34997699	-0.797452271	1.574457332
431	5	2	1.822311831	11.41208316	2	233.0247934	3818.181818	1311.677686	65.88429752	-1.225396991	-0.241877839	-0.208170995	0.981773436
432	7	3	1.311219252	10.14114179	2	232.6263736	3785.71978	1332.840659	66.99175824	-1.363488108	-0.342626565	-0.488333154	0.737313366
433	9	8	1.870179631	11.09324939	2	231.4634615	3759.453846	1331.801923	66.34230769	-1.266889762	-0.086174691	-0.563115402	0.772594425
434	14	9	1.062939102	13.4882188	2	230.3007663	3740.622605	1330.377395	65.17816092	-1.115993004	0.495125528	-0.446959588	1.397028011
435	11	10	1.159450947	10.52555868	2	229.9827255	3710.575816	1332.633397	63.52399232	-1.41659416	0.268594442	-0.858500655	1.397141511
436	10	8	1.437069176	8.569712184	2	230.1708253	3644.516315	1342.927063	61.32821497	-1.45511058	-0.174312551	-0.952332261	0.963089904
437	8	4	0.383505349	8.7960804	2	231.3846154	3572.925	1370.878846	58.43461538	-1.205780298	0.367568812	-0.662643048	1.333162996
438	1	1	0.111272579	12.42362437	2	232.9367816	3476.668582	1424.157088	54.89463602	-0.919885308	0.752417432	-0.334744899	1.660303516
474	5	4	2.247715204	11.926111	2	231.4270833	3914.770833	1281.5625	63.64583333	-1.250181377	0.243678696	-0.394488245	1.295554876
475	2	2	0.560295722	9.736153846	3	232.0398126	3901.079625	1314.742389	65.63700234	-1.22545164	-0.163336084	-0.216336084	0.946721384
476	5	6	1.338901655	9.592264245	2	231.6469388	3884.863265	1344.220408	66.5122449	-1.026871771	-0.261558039	0.007563194	0.707967838
477	8	8	0.726541984	11.07685937	2	229.8604207	3866.543021	1328.910134	64.83173996	-1.061756209	0.025062167	-0.36271085	1.01951183
478	3	1	0.530246861	14.039575	2	228.6903846	3841.921154	1315.663462	63.08076923	-0.748988228	0.418972122	0.054899402	1.296611801
479	12	8	0.704220238	13.08017494	2	228.3610039	3791.861004	1309.266409	61.35714286	-1.304515958	0.594253324	-0.599176923	1.537950557
480	3	1	0.671822452	11.74699995	2	228.9059501	3712.015355	1310.550864	58.86756238	-1.436080627	0.440523744	-0.924141373	1.390553534
481	1	1	0.170725202	35.43077538	2	229.9424184	3617.097889	1345.788868	56.21497121	-1.202335134	0.030526951	-0.776927236	0.926196275
517	3	1	0.895928745	12.48799998	2	228.5890411	4024.493151	1257.657534	60.54794521	-1.506179651	0.081001726	-0.829126418	1.523753643
518	4	4	0.469585287	14.27417314	2	229.2688172	4007.317204	1262.860215	61.44623656	-1.492319942	0.373769614	-0.761672401	1.458675671
519	6	8	0.56468729	10.53773224	2	229.9248434	3983.325678	1286.356994	63.66597077	-1.358833974	0.147271459	-0.528270673	1.07992645
520	4	5	0.647434772	11.77578123	2	229.2408478	3976.809249	1310.992293	63.94026975	-1.001831497	0.011237382	-0.201536239	0.927975323
521	3	6	0.842794415	10.98375939	2	227.8541267	3962.953935	1303.831094	62.62380038	-1.332430679	0.581692794	-0.535181189	1.490823343
522	6	4	0.66531596	11.89227506	2	226.9808795	3939.718929	1284.036329	60.8833652	-1.302353965	0.828108183	-0.682717402	1.780535012
523	3	2	0.737855036	11.48857141	2	227.4114286	3883.344762	1259.081905	58.97333333	-1.389293535	0.909281547	-0.846601355	1.626186126
524	3	2	0.473994204	10.77845004	2	228.7041985	3787.812977	1238.45229	56.09923664	-1.300327384	0.707435979	-0.754638556	1.370333225
528	2	2	0.499355487	25.28686713	2	234.6660269	3385.303263	1506.545106	44.47024952	-0.770825841	1.652456075	-0.129699823	2.005136997
561	4	5	0.876244836	14.98293607	2	226.8068966	4087.924138	1270.622989	59.69655172	-1.490061181	0.540460196	-0.8186734	1.637638376
562	7	6	0.797842764	11.63984572	2	227.1232877	4071.828767	1283.671233	60.88812785	-1.486738773	0.787496326	-0.832482891	1.503515916
563	4	5	0.59815775	12.23644556	2	227.3847656	4055.755859	1272.177734	60.96289063	-1.405673968	0.463164317	-0.806927723	1.13147899
564	7	11	0.719671248	11.75122505	2	226.5171756	4048.40458	1284.776718	60.99618321	-1.21219676	0.125104488	-0.621415053	0.768700149
565	7	8	0.847164897	12.75375009	2	225.6500956	4042.196941	1277.340344	60.47992352	-1.313391738	0.20287284	-0.685494222	0.970684834
566	5	10	0.869202252	13.30776398	2	225.637931	4016.622605	1250.557471	59.34291188	-1.586055033	0.469346206	-0.966151219	1.315371867
567	3	3	0.586460802	13.66512137	2	226.9295238	3953.958095	1203.666667	57.13714286	-1.375703594	0.723992625	-0.823109755	1.418405515
571	4	3	0.455863211	29.53564992	2	230.4942529	3501.915709	1425.894636	47.68965517	-0.40291878	1.222002702	0.246665195	1.795520052
604	3	2	1.940658774	14.2167008	2	224.5765125	4213.72242	1315.010676	61.03202847	-1.532993054	0.442665902	-0.793992662	1.791010594
605	5	7	0.991403374	13.97382073	2	224.8098859	4169.427757	1352.281369	61.89923954	-1.478677325	1.212633718	-0.832055128	1.901735473
606	4	7	0.825945758	13.23985011	2	224.8145315	4139.179732	1328.483748	60.52007648	-1.46274595	0.912808791	-0.969676632	1.511771142
607	13	6	1.403259377	14.81255001	2	224.1931166	4110.296367	1301.690249	58.36902486	-1.200714666	0.515838675	-1.006615689	0.943605945
608	9	4	0.521090442	14.38432504	2	224.0628571	4106.92381	1275.758095	58.3352381	-1.10470438	0.48737577	-0.756812251	0.981487
609	4	3	0.708148003	12.79890006	2	224.0419048	4104.815238	1254.16	58.99428571	-1.086129762	0.506325513	-0.611174914	1.008050793
610	10	8	3.033854819	13.52145748	2	224.2095238	4074.417143	1236.251429	58.67428571	-1.026705474	0.741556056	-0.473233726	1.201337415
611	8	6	0.863438801	14.33557764	2	226.0344828	4005.657088	1189.812261	56.76245211	-0.904754049	0.991753292	-0.228810872	1.567713733
612	2	1	0.295695399	9.375600252	2	227.3536122	3909.142586	1169.718631	54.03231939	-0.698608801	0.460767075	-0.060786937	1.19899635
614	5	4	1.247551514	21.27725705	2	228.7194656	3659.362595	1298.948473	48.45801527	-0.227474143	0.485462365	0.368254833	1.298063879
615	6	11	0.353754011	14.53413099	2	230.6998088	3553.227533	1388.409178	44.82982792	0.513398885	1.874123603	1.028063384	2.144447565
616	8	7	0.75131496	12.11893369	2	233.2294737	3476.271579	1442.949474	41.64	-0.341369377	1.770350883	0.499895418	2.053779021
648	8	2	2.118607228	12.13064061	2	223.1354167	4313.564583	1342.827083	62.61458333	-1.433709118	0.803056497	-0.757994485	1.671939071
649	7	4	2.501221578	13.18914377	2	223.0419048	4256.36	1360.668571	62.26095238	-1.604242224	1.098044863	-1.072561592	1.697166257
650	8	5	1.132150429	11.95530017	2	223.3851992	4205.601518	1330.878558	59.91271347	-1.583433682	0.913343105	-1.103840955	1.44520618
651	16	7	1.366666378	13.6743	2	222.9866667	4174.272381	1303.081905	57.24952381	-1.258472748	0.817913251	-0.946030641	1.232111177
652	1	1	0.661059945	12.80289993	2	222.9656489	4167.467557	1257.244275	57.04961832	-1.100181788	0.743894216	-0.685617797	1.135736562
653	4	2	2.371101909	13.52720317	2	223.026616	4162.330798	1218.726236	57.79847909	-1.030204174	0.841540548	-0.570984187	1.181612339
654	3	2	4.294408528	17.99002903	2	223.8110687	4124.024809	1218.551527	58.03816794	-0.756032404	0.54858579	-0.336148787	0.847051587
655	4	2	0.511868661	13.99745019	2	225.1434034	4043.428298	1188.305927	56.33652008	-0.715397446	0.743042283	0.006723866	1.297743511
656	1	1	0.615947569	13.73389795	2	226.2944551	3959.434034	1165.608031	53.70554493	-0.845095313	0.311143417	0.412440607	1.352787532
657	3	1	0.980299633	12.86883995	2	227.3973384	3837.136882	1202.034221	49.7851711	-0.704828514	0.346815304	0.455576766	1.372684568
658	5	4	0.92278725	13.7131864	6	228.7175573	3713.625954	1289.784351	45.62977099	0.088055961	1.009563686	0.855983432	1.702401018
659	5	3	0.687713404	12.54239188	6	230.8903846	3599.357692	1368.134615	42.20961538	0.564520714	1.844533312	1.175608505	2.091796324
660	9	7	1.286424898	10.64404105	2	232.4734513	3537.584071	1407.469027	40.66814159	-0.047838176	1.88547953	0.716931129	2.116365671
691	4	2	1.614470402	12.64249983	2	224.2804878	4452.414634	1278.853659	58.63414634	-1.709793806	0.624962986	-1.371926904	1.491990209
692	10	4	1.889121016	10.97221909	2	223.2133072	4402.039139	1295.702544	59.79843444	-1.386660405	1.158619288	-1.196664667	1.677852027
693	11	7	2.622197038	10.56255952	2	222.3927894	4329.905123	1306.366224	59.91650854	-1.784968719	1.049498353	-1.370877445	1.538820148
694	12	6	1.403268252	12.45791456	2	222.7847619	4265.748571	1296.685714	58.72571429	-1.804771841	1.013266157	-1.284267008	1.452265136
695	11	6	2.203077129	14.30732478	2	223.7790476	4220.377143	1282.535238	57.63619048	-1.38235417	1.285429883	-0.786298594	1.547525203
696	16	8	1.957284172	13.37840002	2	223.8557875	4219.512334	1246.075901	57.02087287	-1.140925083	1.231323835	-0.816765279	1.380498976
697	8	8	5.556415764	13.05692938	2	223.2933333	4202.939048	1213.918095	56.98095238	-0.996570759	1.496698625	-0.651684716	1.58052858
698	1	1	1.278879385	14.49937922	2	224.2694497	4148.017078	1205.679317	56.72106262	-1.029160094	1.03614407	-0.516582363	1.345998734
699	4	1	0.674458015	13.19992447	2	224.4564394	4063.109848	1200.731061	55.5	-0.818045622	1.106217736	-0.06129209	1.657449639
700	6	4	0.766438979	12.86237498	2	225.0457143	3976.192381	1198.590476	52.80761905	-0.669014759	0.866217885	0.425340429	1.709227577
701	2	1	1.033932803	13.48053022	2	226.379771	3876.879771	1230.877863	47.80152672	-0.433757038	1.093976736	0.604240995	1.817803308
703	6	3	1.353672795	13.58397304	6	230.1478261	3670.568116	1347.243478	40.99130435	0.748449726	1.634118216	1.179607099	1.981303704
735	5	1	4.020668438	11.18599017	2	224.6925676	4564.75	1226.307432	54.41554054	-2.180922202	0.205695527	-2.094411958	0.916132651
736	11	4	1.755094485	11.53639493	2	224.002994	4460.769461	1223.658683	56.06886228	-1.836759011	0.954122886	-1.731114864	1.518150628
737	11	6	3.990384175	10.95781956	2	222.8098859	4385.13308	1259.960076	56.94676806	-1.876483321	0.85128909	-1.543449903	1.458443284
738	2	1	3.728141935	12.90311187	1	222.7969639	4321.485769	1280.036053	56.46679317	-1.765331663	0.71622292	-1.349849236	1.377638429
739	11	3	4.029352388	13.19864809	1	223.7362429	4277.432638	1279.648956	55.82922201	-1.518407732	0.783722606	-1.118767087	1.331649909
740	10	5	3.819360215	13.73353686	2	223.9412879	4266.265152	1259.416667	56.21969697	-1.223110918	1.104498953	-0.977846405	1.26840218
741	7	5	3.873356457	14.31058187	2	223.9466667	4237.815238	1234.034286	56.06285714	-1.021577023	1.595874958	-0.766126594	1.603819913
742	7	10	2.307195866	13.89235602	2	223.905303	4169.816288	1219.589015	55.03219697	-1.087248478	1.64847146	-0.495464169	1.972308844
743	3	1	0.316086513	12.33532496	2	223.891635	4083.977186	1223.994297	53.8365019	-0.953341344	1.974849778	-0.290814735	2.230370207
744	10	5	1.234682748	12.68575	2	223.9753788	3990.674242	1240.518939	51.5530303	-0.342652884	1.951631568	0.40453797	2.259026778
745	10	3	0.692903063	16.23313909	6	225.967619	3908.125714	1258.950476	45.13714286	0.018629594	1.71949929	0.65317308	2.059919024
746	6	4	0.602025683	13.51137919	6	227.6377953	3831.427165	1305.291339	41.3996063	0.644083853	1.837488883	0.877356547	2.021291448
747	1	1	1.172321813	15.90081091	2	228.9146341	3777.585366	1321.02439	41.01219512	0.577646673	1.942827702	0.760988027	2.161036611
778	3	1	6.655173422	9.884754155	2	222.6300366	4648.032967	1265.754579	52.05494505	-2.199094087	-0.271055314	-1.505064845	1.087357715
779	8	3	1.691705555	11.24538845	2	223.5214521	4598.973597	1216.778878	52.92079208	-2.275897086	0.243927261	-2.050709784	1.105934583
780	6	2	3.397682012	9.972567147	2	223.5250545	4516.12854	1201.799564	54.30501089	-2.125995795	0.46429154	-1.929335992	1.226503857
781	14	5	4.180200098	10.66634518	1	222.9791667	4421.136364	1260.763258	55.26893939	-1.857149951	0.558954634	-1.445094593	1.339755394
782	6	3	6.702034097	11.21489077	1	222.5844402	4370.185958	1268.379507	54.78747628	-1.793381453	0.511422541	-1.263655476	1.358870126
783	11	4	5.53061324	13.85933706	1	223.4442344	4338.911153	1275.533081	53.12476371	-1.659572917	0.443592297	-1.275172466	1.203643683
784	3	1	5.596111004	12.21216376	2	223.7931689	4283.954459	1250.711575	54.19734345	-1.508150101	0.439946889	-1.314433776	0.910506174
785	14	9	3.247653932	14.05408833	2	224.0473485	4247.702652	1232.534091	54.09280303	-1.461989239	1.02473779	-1.076663114	1.446061045
786	3	2	1.261883108	12.05700267	2	223.9639469	4183.870968	1225.702087	52.33586338	-1.326772295	1.910684794	-0.818361685	2.123826407
787	8	3	0.704649396	8.910474958	2	223.3269962	4112.657795	1236.31749	50.06463878	-1.223498917	2.145880622	-0.562235455	2.428903055
788	3	2	1.403481293	26.00074846	2	224.1311787	4030.089354	1249.036122	46.40874525	-0.664647993	2.067785755	-0.085835992	2.316249937
789	4	4	0.551149729	19.10314988	2	225.4383302	3943.518027	1266.58444	41.27893738	-0.20272379	1.614654317	0.263332693	1.878371269
790	5	2	1.130970086	12.71144631	6	226.8481375	3880.326648	1293.426934	39.33810888	0.158475507	1.682202208	0.558961001	2.003606582
822	9	4	3.032293113	8.685683073	1	221.1582734	4695.960432	1309.946043	50.34532374	-2.132919574	-0.14202559	-1.104809791	1.125361174
823	8	3	1.33697084	11.65334181	2	221.415879	4623.461248	1289.306238	51.44801512	-2.229921656	0.298583356	-1.78174786	1.054936111
824	17	7	2.49237404	12.69758279	2	221.9981061	4536.751894	1305.441288	52.48295455	-2.174119437	0.421704449	-2.002906926	1.234388322
825	17	5	2.38360882	11.89868025	2	221.9924386	4461.614367	1323.141777	53.41776938	-2.022442216	0.542736496	-1.788015097	1.363934509
826	9	3	5.256081315	12.51949203	2	221.5901328	4430.988615	1251.381404	54.58064516	-1.842212105	0.474889148	-1.332142815	1.36119435
827	3	1	4.142452853	15.17191652	1	222.5348399	4393.661017	1231.288136	53.06779661	-1.655483861	0.524851122	-1.251314032	1.349844307
828	11	6	6.018839302	12.46711315	1	223.1965974	4322.417769	1223.780718	52.34215501	-1.810335243	0.183706617	-1.707260996	0.850455865
829	7	5	2.396988643	16.86581563	2	224.1003788	4275.378788	1216.433712	51.66856061	-1.773158479	0.819620629	-1.541091368	1.318121728
830	7	6	0.958333644	9.185705413	2	223.4328922	4220.287335	1227.132325	49.54820416	-1.613649815	1.522164303	-1.094596058	1.899406351
831	3	4	0.970182768	9.783502431	2	223.0018975	4152.360531	1240.918406	45.9373814	-1.507430601	1.987124434	-0.992830896	2.328647625
832	2	3	0.668035991	21.45517566	2	223.8728653	4074.870968	1249.762808	41.15559772	-0.822299078	2.003280234	-0.216500433	2.33847709
833	7	9	0.833087091	11.60759041	2	224.587473	4003.697624	1261.257019	37.92224622	-0.241741201	1.814309617	0.245511727	2.150024033
866	17	4	1.4705306	8.585333294	1	219.2620321	4703.165775	1336.748663	50	-2.199111938	0.000662573	-1.295062214	0.928458378
867	11	8	1.484138747	10.3947596	2	219.2471698	4632.111321	1351.764151	50.4245283	-2.073677582	0.177154494	-1.523646498	0.760423106
868	16	7	3.671720537	14.40751264	2	219.7932331	4563.714286	1380.321429	50.17857143	-1.807398923	0.092918068	-1.514059164	0.968899451
869	17	6	4.242030044	12.94172934	1	220.3691149	4527.201507	1347.346516	50.48587571	-1.787255466	0.385027199	-1.47675927	1.18775703
870	7	6	1.854044225	16.14014989	2	220.7981132	4500.358491	1276.737736	52.09433962	-1.698884584	0.500847079	-1.377649531	1.242686018
871	11	7	2.596625581	23.96445341	2	221.3460076	4467.661597	1239.062738	51.84790875	-1.686464906	0.253986466	-1.508602554	0.992226404
872	20	10	3.314521854	16.01853915	2	222.6660377	4384.256604	1210.749057	50.72641509	-1.728812225	0.251022728	-1.588700302	1.066181339
873	8	3	2.436019346	10.65513601	2	223.2693032	4317.828625	1206.725047	49.61393597	-1.747243114	0.814402705	-1.566676617	1.517891705
874	11	9	1.423764974	9.80060429	2	222.512334	4269.459203	1233.86907	47.58254269	-1.932885408	1.171188369	-1.716829792	1.77270557
875	10	8	1.200063265	11.30047492	2	222.3622642	4211.90566	1247.401887	43.51509434	-1.687649912	1.597922111	-1.358296791	2.15480845
876	7	3	0.865076536	15.43476183	2	222.8365019	4134.842205	1248.958175	38.22243346	-0.368914489	2.013418838	0.036437323	2.202888757
877	6	4	1.361951902	10.22284221	2	223.443787	4068.532544	1249.266272	36.13609467	0.181951743	2.033576369	0.433161567	2.144123197
910	15	2	3.514288889	21.33975002	2	216.6147541	4742.360656	1354.877049	49.6147541	-2.009523511	-0.173449978	-1.179068357	0.427163631
911	21	11	3.000778801	10.49469238	1	216.4480151	4673.122873	1372.852552	49.86200378	-1.961010766	-0.194560784	-1.420536289	0.028235659
912	19	7	10.69629511	11.85538271	1	216.390566	4620.173585	1375.158491	48.67169811	-1.816191226	-0.01987385	-1.460728601	0.349645633
913	19	13	2.672019228	13.16502498	2	218.1390977	4595.672932	1324.849624	48.45300752	-1.474679947	0.466965104	-1.030570626	1.005450794
914	20	19	1.898876591	17.24002548	2	219.1622642	4572.818868	1283.822642	49.90566038	-1.388468251	0.783569012	-1.091744614	1.206036836
915	9	8	3.276218772	15.86233232	1	220.3552632	4536.524436	1258.543233	50.65037594	-1.366796613	0.671253914	-1.1480688	1.152203584
916	12	4	2.414519375	14.1202949	2	221.4934087	4467.519774	1221.397363	49.4180791	-1.558164001	0.629524324	-1.310003906	1.426790732
917	13	4	2.481328411	11.72609358	2	222.1515152	4405.513258	1218.469697	48.57386364	-1.834321998	0.926282011	-1.572545588	1.635975331
918	13	13	1.479690929	13.08425117	2	221.3088512	4350.612053	1258.105461	47.56873823	-1.963926621	1.147170439	-1.789158535	1.786496598
919	9	3	0.936362031	13.4509971	2	221.100189	4282.746692	1270.043478	44.06805293	-1.36733754	1.556891018	-1.19391273	2.049307055
920	3	2	1.512819675	13.14094258	2	221.3756477	4213.07772	1238.471503	39.93264249	-0.065635228	1.957728167	0.14832147	2.162936643
954	20	5	3.408425338	22.36057172	2	213.5357143	4849.584821	1354.919643	48.54464286	-1.616763728	0.328622379	-1.104787302	0.613563806
955	32	13	4.980379548	10.96548394	1	213.1700935	4798.065421	1372.499065	48.57570093	-1.482417457	-0.259611973	-1.179936484	-0.133275393
956	23	13	5.4594824	13.4856777	1	213.8603774	4745.213208	1350.483019	47.87735849	-1.122797114	-0.187630839	-0.813568298	0.032452188
957	13	5	2.208975026	13.49248717	2	215.4690432	4684.767355	1291.21576	46.55909944	-0.747898903	0.554960293	-0.373610832	0.985554047
958	10	3	2.446185675	13.75974716	1	216.7637051	4677.478261	1259.52741	46.68620038	-0.981762609	1.072851345	-0.745026376	1.400945343
959	8	4	8.054848366	13.01806164	1	218.0414313	4649.478343	1249.723164	47.52730697	-1.149036524	1.020675673	-0.978964356	1.440824538
960	6	2	5.814192958	9.737428548	1	219.212406	4585.964286	1248.133459	48.01503759	-1.469076002	1.091411674	-1.243486211	1.68578361
961	12	3	2.203609804	11.25821795	2	220.1409774	4519.577068	1260.755639	48.7406015	-1.617347294	1.096397126	-1.362845257	1.735347472
962	14	10	1.266055908	10.96654974	2	219.645283	4442.864151	1298.601887	48.81509434	-1.549571115	1.111623672	-1.363844909	1.714353882
963	19	10	1.244909313	15.18446469	2	219.0924855	4371.080925	1328.371869	46.43159923	-0.983124256	1.114250984	-0.820433646	1.694079292
964	3	2	1.835673041	12.24889463	2	218.682243	4301.302181	1266.046729	43.04049844	0.126505448	1.480608728	0.320485337	2.027577188
998	13	6	1.829333389	10.47141181	2	211.4873737	4958.30303	1352.873737	47.54292929	-1.146031183	0.794127464	-1.003684683	0.810923091
999	10	10	5.653609789	7.29439789	1	210.740113	4910.284369	1367.700565	47.18079096	-1.014779106	0.00022183	-0.93065092	0.068002947
1000	16	9	3.434786223	19.7272175	2	211.7274436	4866.524436	1335.06391	46.05639098	-0.877185859	0.062399634	-0.775975775	0.237800333
1001	13	8	3.711076824	18.30334209	1	212.9230769	4816.469043	1277.296435	44.0956848	-0.669337196	0.879116353	-0.509759987	1.15431295
1002	5	2	4.185478631	15.81649041	1	213.9906367	4821.108614	1227.831461	42.55617978	-0.239937829	1.439358279	-0.157857793	1.56207414
1003	7	3	5.943304256	16.21529585	1	215.2730697	4776.629002	1236.218456	43.81167608	-0.401377436	1.338546455	-0.464946407	1.561945468
1004	19	7	4.648458297	11.39376927	1	217.093985	4700.007519	1256.139098	46.06766917	-0.911555294	1.228478827	-0.951784793	1.689483613
1005	17	4	3.445378562	15.04867608	2	218.7514124	4620.768362	1250.764595	47.20150659	-0.877802959	1.392026238	-0.964146111	1.818451777
1006	18	9	2.313709526	14.73769658	2	218.2945591	4526.121951	1304.067542	47.14634146	-0.945988152	1.186757527	-0.886046384	1.732170969
1007	16	4	1.46192294	15.86441613	2	217.2552743	4448.521097	1356.151899	45.45780591	-0.625132628	0.843005347	-0.552294089	1.586677253
1008	7	4	1.101251232	16.68543195	2	217.0416667	4376.321429	1302.416667	43.5625	0.005466635	1.184630479	0.181509795	1.957585827
1041	17	3	1.443890408	7.691214408	6	208.295082	5125.557377	1320.715847	46.95081967	-0.501323346	1.240870322	-0.629333675	1.179627538
1042	21	8	2.242588858	8.819296846	2	208.9041353	5052.421053	1366.676692	46.56203008	-0.920897461	0.795004576	-0.872175407	0.88417536
1043	14	10	3.976255627	8.829485809	1	209.0205993	5001.243446	1370.215356	45.41947566	-0.888234732	0.321019807	-0.862358984	0.455369873
1044	21	8	3.13232153	9.968249971	1	209.6629213	4960.794007	1336.743446	43.89513109	-0.884736661	0.528744798	-0.822504155	0.775270091
1045	9	5	3.873762334	9.96705229	1	210.4661654	4928.962406	1287.065789	42.03947368	-0.679604325	1.036201909	-0.601469925	1.281528726
1046	11	9	5.916561801	14.65154735	1	211.3339587	4926.570356	1244.380863	40.46341463	-0.184170273	1.414108679	-0.18034672	1.483733326
1047	20	10	6.148425837	11.78930169	1	212.593633	4876.073034	1262.013109	42.00374532	-0.092149324	1.065287024	-0.176351395	1.378293955
1048	25	13	3.215705654	19.0568651	2	214.5216573	4796.854991	1299.885122	44.7645951	-0.204108184	0.875423077	-0.412440589	1.356710143
1049	9	5	4.299380438	13.14668666	1	215.7954972	4704.125704	1286.587242	45.26078799	-0.41821556	1.256769031	-0.568648346	1.691377498
1050	17	15	1.679089109	15.1588916	2	215.9830827	4607.979323	1295.753759	44.31015038	-0.713295449	1.314894237	-0.658206455	1.795549892
1051	14	6	2.231760478	13.25361966	2	215.9539952	4525.760291	1319.329298	43.53995157	-0.688022482	1.210810681	-0.469890862	1.836812019
1083	8	1	1.127248842	20.09979175	2	204.3481481	5338.651852	968.8444444	43.76296296	0.134298168	1.44498843	-0.133633462	1.378913959
1084	31	14	1.982955731	15.11654156	2	205.3207921	5270.10297	1090.90495	45.01782178	-0.331722432	1.191469238	-0.412776909	1.174861306
1085	28	15	1.284072687	9.721629099	6	206.5609756	5194.317073	1324.536585	46.64915572	-0.791327981	0.85436793	-0.659431851	0.946728909
1086	37	14	2.091206608	8.932556401	2	207.4074766	5130.04486	1386.259813	45.57570093	-0.785598837	0.703835342	-0.733211952	0.805431506
1087	14	9	3.891177092	10.39240004	1	207.5757009	5083.500935	1373.6	43.85794393	-0.814014247	0.445194502	-0.794004021	0.650048125
1088	7	3	4.855130207	12.2115751	1	207.9041353	5042.701128	1343.221805	42.2443609	-1.106465753	0.254307354	-1.053984317	0.728944308
1089	19	10	3.797668576	20.44428189	1	208.8936567	5011.490672	1306.259328	41.06716418	-0.952313852	0.596159391	-0.884968141	1.083456984
1090	11	14	5.976257986	9.618449731	1	209.3621013	4986.825516	1288.744841	40.30018762	-0.568260819	0.886997778	-0.608137117	1.190055913
1091	24	15	4.442336802	16.78994623	1	210.9235075	4933.742537	1300.802239	41.33395522	-0.35367786	0.424149654	-0.419282955	0.991649997
1092	15	9	4.802099699	24.86810771	2	211.7659176	4867.470037	1339.820225	43.18726592	-0.184452098	0.602290053	-0.452716777	1.137115067
1093	16	15	2.473314052	18.09488578	2	212.7204503	4767.600375	1315.19137	42.71106942	-0.532298329	1.049680401	-0.638693882	1.507549328
1094	16	9	1.926804199	12.90030955	2	214.0945378	4673.678571	1277.010504	41.52521008	-0.914603378	1.418824741	-0.584783977	1.806433495
1095	3	1	1.831615592	16.91250045	6	215	4597.12766	1288.702128	42.17021277	-0.632480363	1.367578308	-0.228544049	1.868553519
1117	9	10	1.608084384	17.83803424	2	201.4383954	5757.272206	1478.30086	36.52722063	1.128983131	1.39951893	1.177710255	1.62727199
1118	14	5	2.028908873	24.485647	2	201.1603053	5732.122137	1469.557252	37	1.014536219	1.274098941	1.165616172	1.623078738
1126	18	6	1.483213526	13.01617827	6	202.0613208	5522.330189	1179.849057	44.02358491	0.041637133	1.413657904	-0.031730246	1.362309575
1127	32	16	1.243266197	15.0190182	6	202.1001927	5447.736031	894.300578	42.71868979	-0.030482419	1.20603675	-0.143794437	1.178414567
1128	27	13	1.856929343	13.59572866	2	203.4542056	5358.590654	909.7738318	42.54953271	-0.513014174	0.859411931	-0.474459015	0.908351794
1129	12	12	0.751962171	12.58822486	2	204.7597765	5274.782123	1288.878957	45.24953445	-0.666133589	0.708085048	-0.540837582	0.808077838
1130	19	11	1.807554588	8.633324928	1	205.7327103	5226.631776	1368.854206	44.08037383	-0.430518419	0.680514514	-0.498447331	0.740412612
1131	16	5	4.943558228	15.23234103	7	205.9476636	5183.95514	1362.502804	42.34392523	-0.480271488	0.689867053	-0.571139354	0.821895483
1132	14	5	6.026504936	16.00236779	1	206.5476636	5137.592523	1335.695327	41.24859813	-0.689620811	0.70622091	-0.703626264	1.013062097
1133	20	14	4.042658787	20.16403562	6	207.2934579	5092.730841	1315.386916	40.70654206	-0.753924605	0.815221801	-0.736144606	1.209844872
1134	14	17	7.940595732	9.671453206	1	208.0635514	5050.171963	1310.379439	40.06728972	-0.845342815	0.428527139	-0.792613331	1.026391719
1135	18	9	2.858807385	16.48660793	2	209.9868668	4992.337711	1313.228893	40.27954972	-1.041169178	-0.16279509	-0.953765741	0.76192297
1136	16	13	2.784616608	17.05515461	2	210.5727612	4912.932836	1315.151119	40.34328358	-0.836835724	0.58120143	-0.847264711	1.208722051
1137	11	12	1.648227301	15.83339513	2	211.6301887	4824.556604	1277.901887	39.39811321	-0.991228235	1.355132056	-0.725858141	1.727680944
1160	10	7	2.740552436	12.61753998	2	200.1564885	5863.889313	1509.580153	33.33206107	1.229112759	1.496519923	1.119952869	1.519126606
1161	18	16	1.754016683	17.71603071	2	200.1607477	5816.130841	1532.441121	34.41682243	1.099989426	1.4359806	1.028522608	1.523607141
1162	23	13	1.766030632	19.08909788	2	199.9162011	5785.413408	1515.061453	34.55865922	1.051687703	1.502911359	1.068472788	1.664426848
1163	10	14	2.001688862	13.29445062	2	200.1417166	5772.660679	1499.209581	34.36726547	0.877180545	1.542428676	0.992221169	1.806736835
1164	13	8	2.872323742	16.21378139	2	200.0994152	5774.555556	1496.988304	33.85380117	0.626155223	1.42033783	0.814723015	1.804975224
1169	13	3	2.431901614	16.67587309	2	201.0552147	5626.932515	1405.030675	41.88957055	0.14338747	1.409843783	0.141253377	1.406237936
1170	24	13	1.123816382	13.88515245	2	200.6219008	5606.113636	1346.489669	43.49173554	-0.059938534	1.386609983	-0.093398022	1.352463667
1171	26	11	1.666246268	14.67596507	2	200.2527881	5551.697026	1017.284387	42.92379182	-0.050692816	1.115289427	-0.159569236	1.121366479
1172	30	11	0.646179212	9.638771982	1	202.2063197	5460.115242	896.0390335	41.03345725	-0.265597761	0.839261407	-0.313671023	0.894486329
1173	11	10	1.047560882	12.42400501	1	203.630597	5391.184701	1183.919776	42.69216418	-0.165891523	0.747280028	-0.300665444	0.802112624
1174	11	8	1.619962542	9.684045799	1	204.2257463	5322.240672	1325.66791	42.44216418	0.111498933	0.75736801	-0.271027314	0.733822268
1175	25	8	2.546030706	15.16109231	1	204.7214953	5282.390654	1337.016822	41.17196262	-0.108531373	0.649611364	-0.442069818	0.629978807
1176	17	13	4.327697212	16.8325453	2	204.8460111	5234.656772	1317.886827	41.02597403	-0.273958711	0.717186896	-0.448811511	0.820496973
1177	15	10	6.430564789	12.32729801	1	205.7910448	5183.518657	1313.962687	40.75186567	-0.434818158	0.848245293	-0.517265707	1.082745243
1178	23	15	4.793712665	20.47726515	2	207.4804469	5123.206704	1310.804469	40.04283054	-0.605100745	0.534069679	-0.652830318	0.919994622
1179	20	12	3.596451445	19.99094467	2	208.6841121	5050.224299	1311.678505	39.53084112	-0.857227749	0.12425354	-0.869360626	0.745566836
1180	15	12	2.526951336	16.9009024	6	209.5981308	4968.515888	1296.130841	38.51962617	-0.773555294	0.846150744	-0.65034307	1.353590883
1181	19	9	2.147596451	12.78209527	2	210.4484848	4894.693939	1273.218182	37.90909091	-0.895741556	1.402957814	-0.521378779	1.759295213
1190	1	1	0.974769352	22.97421536	4	194.0060241	6198.295181	1576.548193	19.47590361	1.584014257	2.195719441	1.263955235	2.066702306
1191	7	3	0.66697997	20.93146698	4	196.2148148	6222.859259	1552.562963	20.17037037	1.517201662	2.158274055	1.273281753	2.069898129
1192	7	3	2.282935466	17.49071444	2	197.9689922	6160.372093	1549.418605	20.95348837	1.120083958	1.930978596	1.04635421	1.957714009
1193	15	7	1.5889043	17.11166048	1	198.0940594	6128.980198	1538.962871	21.38613861	0.916071805	1.925870592	0.831660283	1.936038247
1194	7	4	2.306268982	13.69673069	1	198.4047619	6110.89881	1508.392857	22.1547619	0.909741402	1.88037163	0.894252471	1.883476138
1195	7	2	2.385019588	10.32999998	1	198.8181818	6122.436364	1497.254545	23.27272727	0.829441071	1.880660653	0.875954628	1.834491134
1202	1	2	2.96967374	11.78387102	2	197.0225564	6012.165414	1550.796992	29.4887218	1.120746791	1.369483471	0.851362536	1.368098776
1203	5	5	2.572789843	10.93173154	2	197.8917379	5965.777778	1515.649573	30.46438746	0.964247593	1.55769934	0.601060874	1.501926621
1204	12	17	2.202496742	12.89912811	2	198.3359528	5911.426326	1544.520629	31.35363458	1.060375656	1.434942867	0.926068479	1.463791402
1205	31	15	1.834754984	19.16337616	4	198.4269871	5865.519409	1593.240296	32.03881701	0.995049828	1.33046782	0.913814523	1.418593488
1206	15	17	1.270827632	16.63972482	2	198.4211503	5849.732839	1548.593692	31.55658627	1.009274155	1.567801759	0.995732161	1.725544751
1207	11	14	1.238374138	14.8005498	2	198.6178108	5836.640074	1518.651206	31.48794063	0.855233513	1.4750899	0.911480311	1.661312908
1208	33	16	1.800400933	15.98907255	2	198.894052	5826.449814	1508.663569	31.91078067	0.75665105	1.408002025	0.859686134	1.61922092
1209	12	8	2.461251104	12.59984041	2	199.3241379	5815.282759	1500.8	32.40344828	0.79194657	1.458013018	0.944068352	1.712943196
1212	21	5	1.756257149	11.97436698	2	200.4075829	5705.92891	1447.080569	37.27014218	0.303836025	1.211016615	0.298821381	1.193255623
1213	23	17	1.224731034	13.43259152	2	200.3242188	5670.779297	1428.191406	39.83398438	0.175611648	1.190135308	0.165723604	1.231043003
1214	25	15	1.479196529	14.61397494	4	199.6734694	5674.135436	1377.055659	41.05565863	0.030549436	1.093476892	0.020882505	1.203559041
1215	29	15	0.272604482	19.24927497	2	200.0410448	5631.080224	1209.244403	41.05410448	-0.004975159	0.880950477	-0.014040494	1.053756711
1216	17	12	0.686892158	10.51697503	1	201.6933086	5545.760223	1116.258364	40.45724907	-0.099356678	0.776182595	-0.10492015	0.924438651
1217	23	15	0.746311035	10.96667505	1	202.9421642	5456.68097	1228.973881	41.3619403	-0.087152264	0.915313862	-0.202405	0.995640278
1218	24	10	2.090381968	11.86969991	1	203.0557621	5411.986989	1323.306691	41.70074349	0.017297651	0.780979957	-0.207570357	0.831259528
1219	20	13	2.379483677	13.95223334	2	202.5584416	5376.504638	1321.725417	41.55844156	-0.067573227	0.45218427	-0.305354614	0.523421516
1220	18	13	4.833492964	16.98724139	1	202.3981308	5332.476636	1314.749533	41.47476636	-0.237473175	0.524578827	-0.315005854	0.621193904
1221	16	13	7.49896993	12.61453805	1	204.0910781	5275.301115	1312.436803	40.8605948	-0.328341793	0.657660604	-0.364514579	0.792314875
1222	20	13	3.976771048	17.79236766	2	206.5906542	5205.327103	1305.203738	40.18878505	-0.14214471	0.579390575	-0.283333497	0.739468734
1223	26	13	2.530540765	17.74439147	6	207.9609665	5117.418216	1299.492565	39.22118959	-0.121992121	0.710542748	-0.29177562	0.817865526
1224	16	13	2.115068103	14.66101685	2	208.716	5029.814	1281.256	37.412	-0.540714347	1.074638397	-0.326746932	1.371846981
1233	3	1	1.314715404	21.14731714	1	193.0037106	6231.064935	1618.745826	18.71057514	1.571500123	1.854244635	1.327681184	1.714587018
1234	20	11	4.179068236	21.22867501	1	192.9077491	6255.608856	1595.001845	19.04428044	1.517032939	1.995567936	1.198015344	1.808860952
1235	11	4	1.639656894	22.09029413	5	194.9815668	6257.903226	1570.331797	19.82488479	1.510801286	2.015058041	1.163492421	1.881207923
1236	11	3	3.96637485	18.7024244	1	194.9902913	6167.900485	1599.660194	19.95145631	1.120186627	2.070210397	0.865538761	2.044977466
1237	16	9	1.798487304	19.40160015	1	195.337037	6145.431481	1579.125926	20.20555556	1.121890865	2.070741907	0.847005218	2.04528071
1238	18	10	3.785189906	18.58087832	1	196.9433198	6140.433198	1525.651822	20.85020243	1.065741271	1.971992003	0.912611495	1.961766481
1240	8	3	5.282435873	13.16202992	2	196.627907	6194.790698	1533.302326	23.85581395	1.142695844	2.0105171	1.138134122	2.02270636
1241	10	7	4.396009271	12.55263379	1	194.4849398	6203.11747	1529.63253	25.19578313	1.336146533	2.055296302	1.270995682	2.100291816
1242	9	3	2.436784573	13.96293699	1	194.1598174	6223.328767	1509.497717	26.76255708	1.411495447	2.204798222	1.309835536	2.305117811
1243	3	1	3.840582348	8.113269109	1	195.5876289	6206.484536	1509.814433	27.81443299	1.319391966	2.232075453	1.222742438	2.376379728
1244	14	6	3.394638294	13.48468523	2	195.7214612	6144.073059	1541.09589	27.69406393	1.337430755	2.130267501	1.234864218	2.259141173
1245	20	15	2.180058762	16.42252786	2	195.5560166	6099.139004	1556.742739	27.76970954	1.247154832	1.890922497	1.01524284	2.035121284
1246	7	12	2.673121085	11.51820519	2	195.1233184	6054.704036	1566.46861	27.96412556	1.042215895	1.738145265	0.841004665	1.811202664
1247	14	12	3.400036493	12.40761361	2	195.2023576	6000.726916	1560.689587	28.52848723	1.042998356	1.730017398	1.000237758	1.787063461
1248	9	17	1.669209662	17.67810002	2	195.4317343	5952.313653	1562.719557	28.81549815	1.194803946	1.691597156	1.161634751	1.824489184
1249	29	16	2.869012041	21.26156677	7	196.309833	5928.649351	1556.844156	28.51948052	1.143821436	1.70605222	1.114396262	1.872521996
1250	25	16	1.565533176	14.28235582	2	196.5613383	5917.275093	1530.407063	28.28624535	1.036287207	1.795312651	1.001563899	1.946799368
1251	27	17	1.499229154	14.352225	2	197.0519481	5913.795918	1515.215213	28.57884972	0.805187829	1.526001066	0.885334428	1.785176255
1252	13	16	1.429865992	23.23377476	4	197.3450185	5909.861624	1515.994465	29.22140221	0.707011709	1.366842967	0.760690728	1.543910265
1253	33	12	2.112373298	12.20999993	1	197.7775665	5890.477186	1509.648289	29.9904943	0.757378868	1.452234809	0.773123287	1.592808381
1254	20	10	1.652929042	11.81419347	4	198.1450216	5855.296537	1484.859307	30.64069264	0.811990947	1.515423656	0.842551438	1.657475479
1255	32	13	1.752654134	10.11061098	6	198.5356415	5798.075356	1461.368635	32.25661914	0.587100206	1.404033099	0.62069609	1.547101535
1256	32	17	1.373331607	11.85069997	2	199.393321	5750.244898	1447.105751	34.85899814	0.264569884	1.049298856	0.286042575	1.147849542
1257	19	16	1.160119947	14.97758175	2	199.4328358	5730.546642	1428.589552	36.88992537	0.192968912	0.92274189	0.203250664	1.044376832
1258	25	16	1.559003972	17.34335016	2	199	5733.441558	1388.736549	37.74211503	0.148518648	0.823399615	0.154520126	1.075841535
1259	22	11	0.764545847	13.30379415	1	199.6814815	5702.262963	1317.240741	38.2462963	0.116214603	0.615729567	0.170559814	0.93226099
1260	23	10	0.731995153	9.495675001	1	201.1189591	5611.079926	1257.563197	38.1802974	0.057666363	0.651500177	0.105782688	0.849596256
1261	16	13	1.977380665	10.85132507	1	201.716141	5539.539889	1290.487941	39.08163265	-0.069727591	0.709665027	-0.124153321	0.800506078
1262	18	10	4.835140256	13.95440013	4	201.4333333	5500.138889	1333.924074	40.27222222	-0.054788211	0.609150827	-0.133056865	0.68278826
1263	22	15	2.309960096	15.39773209	4	200.6747212	5465.698885	1335.914498	41.26394052	0.033966818	0.437635092	-0.037387994	0.496447521
1264	13	10	3.088623597	15.20746013	4	200.393321	5423.038961	1327.328386	41.71243043	-0.283517224	0.44494161	-0.229765766	0.527932126
1265	19	17	6.031804213	9.632010237	2	203.1802974	5372.133829	1309.351301	40.98513011	-0.501547471	0.6484394	-0.361447397	0.800049849
1266	10	11	3.199287804	12.49304094	2	206	5297.646182	1293.225326	40.16387337	-0.296201028	0.558852909	-0.210810577	0.912155654
1267	14	11	2.523498671	16.83440857	2	207.4349442	5196.319703	1281.628253	38.66914498	-0.358994315	0.758494511	-0.347201147	1.084852457
1268	15	6	2.625204851	14.26022352	2	208.1832061	5102.366412	1265.950382	36.53435115	-0.605234063	1.080231833	-0.500564569	1.220178699
1277	4	1	5.815916852	20.01428594	1	190.6360294	6326.194853	1628.821691	18.01286765	1.538330883	1.492616445	1.301557779	1.405974537
1278	15	9	8.966187148	18.60626659	1	191.6944444	6338.790741	1612.164815	18.69444444	1.332720804	1.60848536	1.085112345	1.507668912
1280	25	11	6.075089629	19.71813756	5	193.0649606	6211.976378	1627.19685	19.03346457	1.320066301	2.009475551	1.079436529	1.908564234
1281	22	13	4.97183283	18.77248757	1	192.9686924	6177.243094	1615.132597	19.14548803	1.172277927	2.069539517	0.926370826	1.992506839
1282	25	15	5.58028405	18.14857513	1	194.0147601	6188.415129	1575.726937	19.44649446	1.20611639	1.945420628	1.046420866	1.895121896
1283	26	12	7.596041712	17.35752	1	194.6119691	6221.471042	1570.909266	20.74131274	1.139961883	1.972402736	1.042025181	1.935246833
1284	21	15	10.52929367	14.32029337	1	194.1453155	6253.051625	1562.801147	22.20650096	1.15512287	2.150415515	1.054640245	2.109006731
1285	17	15	7.944296459	11.98274989	1	192.2259259	6252.581481	1547.601852	23.19259259	1.220132279	2.179706812	1.017327327	2.164731205
1286	17	15	7.583372568	9.813699889	1	191.6549815	6268.747232	1531.370849	24.53874539	1.182485366	2.369081907	1.033554363	2.376951563
1287	18	14	7.894211503	11.09426666	1	192.43762	6252.472169	1539.702495	25.28790787	1.150215538	2.373321954	0.990276534	2.392377824
1288	19	10	6.235764653	14.43090677	1	193.3089109	6203.364356	1566.291089	25.71287129	1.03390436	2.233353979	0.778587159	2.238494492
1289	26	10	5.619317	16.99617519	1	193.7296296	6158.388889	1567.522222	25.94444444	1.095144906	2.084413776	0.854698762	2.146560204
1290	21	14	8.924910804	11.06963243	1	192.9723247	6110.715867	1559.405904	25.99446494	1.182966423	1.882884544	1.034268178	1.963869676
1291	14	13	6.958810603	9.95239683	1	192.4548803	6054.377532	1551.535912	26.21731123	1.310912389	1.815025783	1.223067708	1.882925354
1292	19	13	5.497509173	11.91278195	1	192.3907407	6010.237037	1543.361111	26.11851852	1.326411957	1.881896204	1.254538804	1.964972071
1293	25	16	4.491379649	19.39925008	5	194.3394834	6001.114391	1502.804428	25.36531365	1.289637771	2.052704401	1.211371976	2.097836471
1294	35	16	4.145369072	14.31022665	1	194.5009242	5992.434381	1493.669131	25.37338262	1.165536678	2.050726581	1.129120603	2.122664675
1295	26	18	4.288248706	13.43323078	2	195.1663586	5982.903882	1492.550832	26.03142329	1.013377938	1.85656234	1.075916778	1.98093269
1296	17	16	4.029602456	27.4222099	2	195.6240741	5975.946296	1506.205556	26.94074074	0.746817545	1.452374339	0.832139415	1.60985741
1297	16	14	3.804663112	10.36125323	1	196.3394834	5964.636531	1507.431734	27.65129151	0.598163563	1.334185857	0.672961157	1.512469366
1298	33	17	3.005056087	12.22726128	1	196.1447124	5920.526902	1475.365492	27.93692022	0.700728822	1.640374345	0.741578136	1.865601607
1299	29	14	2.743474787	15.42972434	4	196.212963	5864.859259	1449.331481	28.9	0.649102715	1.757265747	0.674405325	2.021383382
1300	25	16	1.274658533	20.69582919	2	197.25	5830.925926	1426.238889	30.95	0.438152386	1.428618369	0.482558061	1.560531181
1301	12	16	0.941616765	25.90777499	4	197.7804428	5806.957565	1403.487085	32.77490775	0.368227176	1.112219417	0.413176268	1.114784408
1302	28	14	1.300840433	10.91605008	1	198.4126394	5790.635688	1376.44052	34.03159851	0.353944278	0.861987692	0.392213883	1.002283122
1303	8	9	0.879719425	12.11614999	1	199.6377079	5753.101664	1346.109057	34.75415896	0.376815141	0.538557079	0.516469767	0.877555918
1304	18	14	4.231626956	12.13556673	1	199.4074074	5674.738889	1328.47963	35.27962963	0.25953366	0.489688615	0.375306756	0.803198409
1305	20	12	4.144935739	11.73124357	1	199.6716141	5616.480519	1334.499072	36.38404453	-0.112946613	0.503885694	-0.161019728	0.696651973
1306	18	18	2.036038529	16.05264108	4	199.1038961	5584.166976	1352.040816	38.32653061	-0.021573195	0.454371105	-0.089862826	0.541109873
1307	15	15	1.63831076	19.29967194	4	198.8420074	5557.745353	1355.35316	40.20446097	0.048327416	0.438958369	-0.044957883	0.31568057
1308	17	13	4.120388512	13.98511356	4	200.4832714	5532.16171	1335.934944	40.79739777	-0.508270246	0.717883494	-0.314690671	0.685462959
1309	22	13	4.291263501	12.17154637	1	204.3122677	5484.576208	1296.877323	40.7936803	-0.673044297	0.827210635	-0.244872038	1.004251242
1310	24	8	2.8448338	15.20595149	2	206.7712177	5409.881919	1268.038745	40.38376384	-0.416718399	0.825904819	0.027172729	1.221737973
1311	28	15	2.342481299	16.54826203	2	207.2129278	5308.876426	1264.460076	38.80608365	-0.421368852	1.084758302	-0.002569564	1.320238398
1321	14	7	9.157702228	19.53900697	1	187.4306839	6399.362292	1627.863216	17.91866913	1.585843816	1.166708264	1.332256086	1.114230387
1322	25	10	10.40900785	18.60375933	1	189.2385321	6384.282569	1619.889908	18.05321101	1.576767915	1.443985486	1.321525812	1.373558849
1323	36	15	2.947083081	26.69007612	1	192.2513761	6332.842202	1608.87156	18.6733945	1.606168672	1.661714837	1.332706049	1.562968247
1324	29	15	5.968462963	22.17710622	5	191.8579336	6264.090406	1633.225092	18.95940959	1.601525754	1.743762441	1.322606094	1.622179225
1325	21	16	5.569778352	18.77427507	5	190.9356618	6234.922794	1627.955882	18.55514706	1.540509604	1.860289365	1.299192175	1.776959479
1326	21	10	7.271152368	18.27503771	1	190.3241252	6232.278085	1612.377532	18.67219153	1.523259842	1.871048671	1.348905325	1.8287983
1327	22	13	4.680954215	17.3311249	1	190.0848708	6242.0369	1614.869004	19.68450185	1.441378668	1.956055522	1.285984866	1.966961257
1328	19	13	9.283174649	16.25607508	1	189.9117647	6270.777574	1592.770221	20.65441176	1.390405931	2.148425192	1.222639672	2.136142477
1329	21	13	10.01361146	15.15834579	1	188.9225092	6288.278598	1567.97048	20.90405904	1.291618459	2.18750529	1.091041833	2.19986628
1330	28	16	7.424666257	14.23919994	1	189.1841621	6303.797422	1551.313076	21.70718232	1.025260869	2.215644467	0.915671453	2.268414724
1331	18	16	7.250887614	11.39399995	1	189.3265683	6294.407749	1565.957565	22.65313653	1.071058806	2.087110102	0.902805425	2.132245079
1332	36	15	7.952149513	14.49615784	1	190.4750462	6256.219963	1589.866913	23.70425139	0.805638187	2.097114578	0.554206254	2.058708996
1333	32	13	5.227429885	16.70795972	1	191.9963168	6221.25046	1559.559853	23.97053407	1.093680856	2.084347725	0.879995495	2.123616421
1334	28	16	2.498579135	17.68488607	5	192.1860037	6188.110497	1519.948435	23.92265193	1.3159872	1.936596863	1.16147548	1.983819477
1335	31	15	8.822990946	15.42669168	5	190.9037037	6147.375926	1506.127778	23.8462963	1.436808452	1.87976256	1.340612367	1.912297599
1336	29	14	9.338124255	15.34585232	1	191.2996324	6110.077206	1491.966912	23.63051471	1.320484012	1.939664915	1.252516635	1.991330534
1337	21	16	6.438149547	17.44134993	1	192.9461967	6086.528757	1467.250464	23.31168831	1.268067008	1.999951434	1.206081265	2.060742503
1338	36	12	7.129666516	15.43569951	1	193.3099631	6067.625461	1457.852399	23.36900369	1.269004598	1.981643267	1.234989598	2.042546213
1339	24	11	5.441932524	15.83484935	3	192.6802218	6045.604436	1463.804067	23.90573013	1.264382601	1.930019557	1.28692203	1.973078452
1340	33	15	7.607302321	16.05537469	3	193.8872458	6024.066543	1468.114603	24.88539741	1.119812474	1.779274184	1.179253671	1.859267116
1341	20	8	8.699981357	15.03300841	3	194.3382625	6010.155268	1470.4122	25.39001848	0.86417339	1.721147195	0.915151432	1.861796267
1342	14	12	6.561256736	14.89091394	3	193.909427	5974.761553	1449.805915	25.47319778	0.838171065	2.01166974	0.817587391	2.213005364
1343	33	15	4.532189194	16.68043138	4	193.6451017	5927.926063	1425.89464	25.90942699	0.84595798	2.171500444	0.800149351	2.392861858
1344	18	11	1.381329145	23.14967493	4	195.4704797	5895.260148	1391.309963	27.68819188	0.648529297	1.634254616	0.694796827	1.670933342
1345	18	13	3.24948511	19.0538071	2	196.1148148	5883.161111	1366.062963	29.32962963	0.464301363	1.17825751	0.594580274	1.005894281
1346	22	13	1.911505774	9.764799999	1	197.3259259	5862.783333	1350.5	31.03703704	0.519748427	0.923379343	0.553915748	0.92079933
1347	27	12	3.244408801	12.082725	1	197.8074074	5818.968519	1348.903704	32.13333333	0.579093393	0.614209916	0.615081355	0.699695155
1348	20	11	3.407922358	12.84289747	1	198.2851852	5764.064815	1344.927778	33.30740741	0.535913403	0.549822898	0.571996008	0.697434485
1349	24	13	2.419386835	13.59697488	4	198.2319109	5703.326531	1348.289425	34.98144712	0.234529534	0.514162574	0.222595701	0.640965961
1350	11	16	0.951518665	15.34166223	6	197.8539741	5668.306839	1358.438078	36.93160813	0.20135794	0.443426784	0.141730104	0.460934173
1351	12	13	2.256256477	15.89720005	4	197.7773655	5654.051948	1364.378479	38.83858998	0.192823148	0.372726993	0.085146775	0.199826689
1352	13	17	2.630299911	17.08277506	4	200.5988909	5629.393715	1340.502773	39.47689464	-0.569388447	0.842594938	-0.207924133	0.729081467
1353	19	7	3.185549995	17.9235038	2	204.4230056	5597.962894	1297.046382	39.92207792	-0.443620265	0.876777496	0.138680072	1.150561728
1354	19	6	2.320893061	18.14125006	2	206.8163265	5534.380334	1251.927644	40.35250464	-0.089563856	0.835204473	0.476269493	1.336074889
1355	20	8	2.652707704	19.37653867	2	207.0459459	5456.267568	1257.556757	39.75675676	0.343452568	1.133390188	0.902105618	1.411247814
1365	20	8	9.514360263	20.0796824	1	184.8788991	6459.572477	1611.73211	17.89541284	1.601139106	0.926284421	1.386758989	0.855904526
1366	25	16	11.09439955	19.33529997	1	186.4007353	6435.586397	1615.294118	17.98529412	1.682225364	1.312197244	1.478240151	1.247451599
1367	36	16	5.312435156	25.13373767	1	189.5616943	6389.399632	1604.033149	18	1.676531464	1.498111062	1.464806825	1.416461802
1368	37	17	6.295987096	22.71835013	5	189.7665441	6337.827206	1617.097426	18.06985294	1.662471771	1.621667288	1.448123884	1.5142887
1369	18	12	4.88423248	18.79709277	5	187.5266055	6315.574312	1626.766972	18.00917431	1.668670267	1.76016257	1.46942578	1.653522193
1370	19	9	6.158456537	19.18849498	3	186.4154412	6290.871324	1618.602941	18.125	1.690599799	1.836070812	1.521539874	1.766275387
1371	30	11	5.928404535	18.52338328	1	185.9117647	6238.141544	1609.977941	18.98345588	1.673179202	2.000032835	1.478688157	2.011527264
1372	25	15	5.524047777	17.68949992	3	184.6574586	6245.856354	1603.734807	19.09760589	1.60621269	2.081081674	1.380019456	2.116384614
1373	26	18	5.573851527	17.02959597	1	185.2177122	6314.267528	1577.02583	19.25461255	1.454550706	2.010150738	1.28293736	2.032048911
1374	26	15	5.65588926	16.73220005	1	185.7532228	6349.60221	1560.268877	19.5985267	1.256252402	1.951381582	1.137407432	1.986497874
1375	16	12	4.515225673	17.60057938	5	186.3608059	6349.871795	1561.571429	20.41758242	1.22041291	1.913376756	1.074583232	1.966997296
1376	21	15	4.388950146	20.80140371	3	187.9944954	6330.113761	1558.26789	21.31926606	1.222281076	2.014599532	1.040550059	2.028973556
1377	20	12	4.276287677	15.30681019	1	190.2380074	6298.440959	1514.883764	21.93726937	1.352907789	2.013180226	1.158868427	2.012067981
1378	22	16	2.270267628	16.14087506	5	190.5479705	6272.675277	1472.931734	22.08487085	1.399244502	1.945038393	1.250413674	1.978340828
1379	19	11	1.869390901	17.86314991	5	190.6697248	6251.73945	1446.818349	22.13944954	1.515693136	1.899284199	1.398670143	1.933586895
1380	44	15	3.038850959	18.61352508	3	191.4259259	6205.744444	1436.911111	21.91111111	1.313483588	1.880439371	1.229296184	1.934805268
1381	24	12	2.446304773	13.46542924	1	192.6391941	6170.978022	1426.81685	21.77655678	1.211805493	1.911328059	1.126591811	1.978520212
1382	31	13	5.931168968	17.26492862	3	193.732965	6146.108656	1411.845304	22.0092081	1.179998234	1.983990468	1.113981903	2.069227684
1383	29	10	8.433070976	17.1955349	3	192.8088235	6129.310662	1412.398897	22.37316176	1.05227273	1.923144899	1.021655962	2.047022027
1384	23	11	7.002337878	18.37618917	3	192.5988909	6093.853974	1425.068392	23.2883549	0.979384643	1.83566857	0.978038118	1.954222507
1385	31	13	5.404289518	17.29123646	3	193.5302752	6062.60367	1422.12844	23.87522936	0.823521428	1.75174059	0.802563557	1.84658246
1386	18	14	7.037062344	18.95477169	3	193.2316176	6022.551471	1408.428309	24.07904412	0.764747307	1.850590959	0.713983482	1.969945061
1387	20	13	6.293990931	19.35144306	3	193.5907407	5976.955556	1382.694444	24.58703704	0.818620097	1.844902202	0.773637331	1.947150177
1388	15	13	4.242619331	18.82888046	3	194.3604436	5959.243993	1354.140481	25.81700555	0.879780009	1.623691863	0.932270129	1.702875295
1389	21	12	5.306034693	12.74544311	1	194.9502762	5954.32965	1327.394107	27.50276243	0.545346301	1.208632365	0.639865439	1.222414941
1390	27	14	4.519193001	11.57347721	1	195.6574586	5942.206262	1319.939227	29.48066298	0.541541243	0.888525818	0.543572779	0.904343268
1391	15	10	3.641185668	14.40839602	1	195.5055351	5909.138376	1334.437269	30.74169742	0.728818133	0.647777434	0.693076327	0.611476929
1392	19	15	2.290497198	16.13262503	6	195.6070111	5860.256458	1344.97048	32.00369004	0.68627167	0.601405939	0.658694644	0.615575124
1393	14	14	1.879967587	16.98514975	4	196.1885397	5782.54159	1347.645102	33.73382625	0.44678623	0.540935785	0.455144277	0.633268487
1394	9	15	0.884862124	18.75594971	6	196.8505535	5734.651292	1352.97417	35.64575646	0.326060342	0.397831911	0.324562359	0.490506315
1395	11	14	3.050905077	14.65544998	2	197.5110701	5712.254613	1354.407749	37.01845018	0.075976469	0.278491461	0.142101219	0.335590339
1396	16	14	2.433044299	18.3692001	4	200.1848429	5696.151571	1335.722736	37.76340111	-0.126127076	0.60924672	0.238795664	0.6691361
1397	18	8	1.858362436	17.68108869	4	202.8410351	5677.194085	1305.491682	38.70979667	0.285179284	1.11951261	0.75658468	1.212114418
1398	13	4	3.014651071	17.29182114	2	204.9759704	5620.277264	1252.574861	39.40850277	0.263671908	1.148256391	0.815129972	1.391129148
1399	5	1	1.6818951	23.31580405	7	206.1857923	5564.15847	1224.47541	39.45355191	0.359662145	1.164157867	1.101115108	1.525853276
1409	16	7	5.126744703	21.06485363	4	182.7647059	6517.270221	1588.204044	17.99264706	1.71963169	0.818068799	1.563065469	0.769563586
1410	26	19	5.540838582	20.73329994	4	184.7568556	6496.630713	1590.009141	18	1.756587834	1.104048617	1.622236043	1.062497857
1411	28	13	4.098786867	21.55964717	7	187.1133455	6461.619744	1581.855576	18.00914077	1.657473242	1.300752676	1.516612828	1.234310545
1412	41	17	3.911565274	22.83733678	7	187.4080882	6431.207721	1584.003676	18.02757353	1.641493863	1.450927174	1.496691108	1.353421122
1413	22	12	7.356585694	19.2746501	3	184.6047794	6422.625	1600.709559	18.00183824	1.676325649	1.62108826	1.516214035	1.507149011
1414	13	11	8.510994418	19.16848112	3	183.1473297	6394.464088	1599.790055	18.38858195	1.709925418	1.734778223	1.573696715	1.667288166
1415	27	13	7.200066357	19.43090224	3	182.5714286	6321.923077	1594.06044	18.996337	1.63250525	1.959067154	1.457635663	1.973435804
1416	29	15	6.649347768	19.44639983	3	182.1376147	6317.159633	1586.099083	18.97614679	1.527244699	2.025303292	1.32569357	2.053397827
1417	28	16	4.981559655	18.64087493	3	182.3485401	6384.843066	1567.861314	18.79014599	1.449226892	1.861497164	1.289670661	1.90401689
1418	21	14	5.104120072	19.95834993	1	182.6360294	6420.716912	1550.588235	18.78492647	1.359386125	1.807541966	1.219003183	1.881369621
1419	22	14	3.938399628	18.12220554	5	183.9538745	6423.293358	1535.04797	19.08856089	1.366892987	1.828404367	1.242683344	1.891333759
1420	15	11	4.371702804	17.06342497	5	186.6623616	6404.516605	1503.271218	19.70664207	1.41199944	1.924007434	1.236809283	1.938434936
1421	31	14	7.51803122	15.75789994	1	188.5110294	6383.886029	1457.615809	20.45404412	1.45449903	1.972265277	1.220089471	1.946171862
1422	17	9	3.676492025	17.37027564	5	189.0513761	6372.743119	1420.32844	20.85688073	1.33620289	1.968607837	1.135099232	2.002813503
1423	31	12	2.655693942	17.94202506	5	189.9392265	6343.430939	1401.198895	20.78453039	1.366362083	1.933401173	1.212012433	1.967479348
1424	29	10	1.730375901	17.00262507	5	191.2340037	6300.656307	1395.429616	20.87568556	1.287308717	1.932509691	1.167062163	1.966969937
1425	26	12	2.616994601	14.09453638	1	192.2749077	6250.839483	1392.752768	21	1.139728851	1.954495678	1.022730291	2.024945855
1426	6	3	3.667535662	17.16115577	5	193.3069853	6212.231618	1383.121324	21.09926471	1.002718639	2.003870517	0.898891408	2.110084862
1427	24	11	3.175227333	14.866771	1	193.9944649	6197	1371.274908	21.95940959	0.94838289	1.933336931	0.928388905	2.069834739
1428	21	9	5.012521898	17.09243121	3	193.1522936	6156.2	1382.157798	22.70458716	0.819105027	1.831539917	0.807559678	1.934053606
1429	19	8	4.732799611	18.17382516	3	192.7034991	6126.839779	1384.751381	23.04972376	0.65745475	1.692837393	0.644588754	1.772410519
1430	26	15	5.512549882	16.93305786	3	193.4354244	6085.856089	1363.857934	23.71402214	0.608557495	1.766311115	0.57780448	1.865271643
1431	16	6	4.581803589	18.40356802	3	193.5036765	6040.516544	1338.8125	24.02389706	0.763754019	1.699620879	0.714471657	1.783048809
1432	27	9	4.559410652	17.04785919	3	193.4889706	6018.386029	1316.069853	24.94485294	1.075072966	1.626745672	1.01049183	1.706097728
1433	28	15	5.869523825	16.17293249	3	194.2302026	6033.71639	1287.35175	27.09023941	0.635029934	1.113143799	0.549799712	1.196795195
1434	24	13	3.060657693	13.98572527	1	194.5027726	6030.415896	1280.208872	29.29390018	0.499948947	0.880481887	0.449985391	0.987948481
1435	13	17	2.555768597	17.20919976	6	194.1415441	5990.472426	1302.882353	30.13602941	0.770475125	0.849528757	0.703018427	0.897953976
1436	15	17	1.418983257	17.7228996	6	194.1143911	5943.374539	1325.396679	31.16051661	0.78992101	0.746512215	0.70820348	0.78561109
1437	15	17	1.658793197	18.41479968	6	194.9796673	5871.621072	1333.645102	32.71349353	0.569278306	0.477873783	0.522380471	0.557505464
1438	6	5	0.401344537	31.00019891	2	196.3671587	5822.060886	1337.016605	34.43542435	0.385784929	0.149750602	0.358234826	0.360141142
1439	14	14	2.78456694	23.98989923	2	197.795203	5761.51107	1337.806273	35.6697417	-0.023059502	-0.033041467	0.188717508	0.31022159
1440	26	17	3.038509694	18.25562503	4	199.4667897	5744.630996	1325.490775	36.18450185	-0.023346479	0.269957634	0.29323652	0.492059447
1441	15	16	1.709264898	19.82519996	4	201.162963	5730.272222	1302.592593	37.08148148	0.322153731	1.016082329	0.654889388	1.110631038
1442	17	6	2.859734675	26.05299158	2	202.547025	5685.207294	1266.230326	37.90019194	0.32297378	1.26899817	0.67124392	1.429525926
1453	21	14	5.487559151	21.25878883	3	180.5136612	6584.832423	1571.298725	18.46994536	1.859240204	0.732832078	1.724549301	0.730401896
1454	24	17	5.254398398	20.97055001	3	182.8477064	6568.568807	1565.133945	18.61100917	1.895690823	1.010692179	1.81074928	1.051722661
1455	39	13	4.424658189	20.64769412	7	184.6477064	6543.33211	1557.629358	18.83119266	1.529349431	1.141291007	1.520828806	1.109173156
1456	40	17	7.82621448	18.97257487	1	183.9137615	6526.644037	1562.521101	18.92293578	1.565026447	1.326833628	1.469261378	1.266991779
1457	39	13	9.434070898	16.48797525	3	182.770073	6535.927007	1558.060219	18.71350365	1.583714478	1.441413015	1.456429265	1.322976381
1458	26	14	8.612079926	19.82102522	3	180.3868613	6536.062044	1569.091241	18.8540146	1.559245187	1.579856259	1.431514049	1.490973908
1459	32	16	8.348678154	18.94945005	7	180.3137615	6499.198165	1570.73945	19.42201835	1.448223747	1.696808331	1.278371319	1.677254356
1460	36	12	5.830521355	19.10937484	3	180.3058608	6504.388278	1570.10989	19.36446886	1.407117382	1.725206792	1.208266772	1.70597028
1461	31	16	5.826425396	18.89402501	1	180.5948435	6502.981584	1545.891344	19.00552486	1.403144591	1.771026105	1.242058292	1.817932531
1462	27	15	5.767831387	17.50952125	1	179.9341865	6507.937843	1528.372943	18.93235832	1.365076602	1.791182691	1.237889355	1.918665063
1463	27	10	5.468982474	17.30609142	5	181.4223035	6501.826325	1508.142596	18.98903108	1.431013696	1.788721427	1.302019618	1.862689964
1464	26	10	8.068218244	17.89599972	1	184.1645338	6480.149909	1471.288848	19.00731261	1.407590866	1.873399019	1.246910729	1.892401367
1465	20	6	7.587868867	18.21447486	1	186.2348624	6457.031193	1415.014679	19.71192661	1.34059875	1.908028835	1.164203173	1.939942098
1466	31	15	9.799670415	16.70389994	1	188.2948718	6454.038462	1361.967033	20.34065934	1.339390554	1.893102273	1.17429021	1.96281708
1467	28	11	4.467412828	17.97549989	5	188.8697248	6441.278899	1362.783486	20	1.377882436	1.854505651	1.204057403	1.892891712
1468	17	5	3.804562791	18.22392489	5	189.8103131	6385.672192	1373.747698	20.26703499	1.255152926	1.913641095	1.094248027	1.926573589
1469	29	8	3.967020565	17.69675889	3	191.4680073	6314.30713	1369.144424	20.99817185	1.031726065	1.938252169	0.92295731	1.975930339
1470	19	6	1.394910027	18.65764994	5	192.6353591	6267.987109	1361.169429	21.41620626	0.866701283	1.966770612	0.764631845	2.046647012
1471	19	4	2.325327573	16.26612501	3	193.3948812	6230.648995	1350.595978	22.03107861	0.895249981	1.929193214	0.840818916	2.014843471
1472	23	10	2.757549254	15.63899762	3	193.6286765	6223.773897	1346.487132	22.87867647	0.732608899	1.801000386	0.731838602	1.825116885
1473	17	7	4.493646196	19.08510032	3	192.335175	6213.758748	1350.52302	23.02762431	0.57446566	1.665910706	0.62190517	1.668816298
1474	18	8	4.358286362	16.82587524	3	192.6378676	6161.161765	1327.222426	23.11029412	0.686201941	1.671407886	0.714107361	1.754898265
1475	16	6	2.845486721	15.69575006	3	192.6366972	6118.211009	1301.822018	23.49908257	0.783999372	1.559716605	0.852097843	1.632569678
1476	24	14	4.610825868	17.07348508	3	192.8637201	6101.567219	1273.191529	24.46040516	0.914276746	1.446284389	0.881200507	1.497412533
1477	14	9	3.470366349	16.15566432	3	193.5709024	6117.395948	1244.499079	26.98342541	0.837440673	1.158677366	0.768193979	1.19442153
1478	24	13	3.740372276	15.70758196	4	193.7412844	6125.53211	1237.289908	29.57798165	0.761715695	1.042551428	0.679527842	1.113506742
1479	15	15	2.257924577	16.51453615	6	192.4732965	6075.482505	1278.138122	29.49539595	1.041770119	1.023202416	0.873462312	0.900085196
1480	10	18	1.619541059	17.87241163	6	192.1229358	6009.302752	1308.987156	30.11192661	1.05445866	0.943661171	0.856034949	0.777419615
1481	9	13	1.128323257	22.74867435	6	193.6845018	5965.001845	1314.594096	31.66236162	0.702872489	0.545771535	0.58463642	0.608255841
1482	7	6	1.50970442	31.66949937	2	195.1966912	5893.577206	1318.694853	33.24264706	0.534453029	0.196810463	0.426781632	0.412841484
1483	16	12	2.506965214	23.64187452	2	196.7808471	5824.12523	1322.195212	34.45488029	0.109983037	0.107191946	0.254278509	0.415109457
1484	20	13	3.903996322	18.99844605	6	198.3455882	5800.310662	1313.097426	34.82169118	0.01747929	0.287386981	0.290394318	0.54584075
1485	28	12	2.238956506	22.32375941	4	199.4567219	5790.725599	1298.911602	35.59484346	0.131408122	0.837165523	0.441016709	1.037785858
1486	13	5	3.833448653	14.53391136	1	200.4757282	5770.300971	1280.808252	36.68203883	0.327560287	1.19990714	0.612494135	1.379771626
1497	37	14	6.413338941	19.78182889	1	179.2183486	6656.277064	1545.401835	19.40183486	1.68210119	0.649160944	1.521269642	0.561117698
1498	43	16	7.652407992	19.16190478	7	181.3879781	6641.517304	1538.355191	19.44808743	1.658116645	0.851367509	1.539833593	0.806634596
1499	47	13	12.06285511	18.60077675	1	181.5591985	6629.923497	1540.797814	19.47905282	1.482338071	1.153061125	1.448541753	1.126206182
1500	39	17	13.4905411	15.76902492	1	180.5009141	6616.985375	1545.367459	19.73491773	1.515991993	1.337888882	1.358829923	1.321404524
1501	38	14	10.05666737	18.29098734	3	181.6654479	6630.542962	1512.032907	19.7952468	1.460343339	1.325965174	1.289168224	1.251515284
1502	45	16	12.61788482	15.8661754	3	179.5724771	6652.053211	1521.095413	19.79449541	1.473499435	1.536396766	1.308484846	1.484434408
1503	31	17	7.47347501	18.14787469	3	178.8738574	6643.93053	1532.987203	20.04021938	1.391381867	1.603749298	1.204499058	1.565872185
1504	35	17	8.854174108	18.09942453	1	179.3327239	6646.850091	1537.753199	20.02925046	1.378662243	1.650974251	1.16214826	1.613769501
1505	20	13	10.43607987	17.77449976	1	179.3278689	6613.644809	1518.287796	19.65938069	1.39690648	1.662677981	1.23970449	1.690398172
1506	32	16	10.71588101	16.72281304	1	178.8770642	6595.315596	1498.497248	19.12293578	1.373483598	1.713541216	1.251020104	1.78575139
1507	22	11	8.118554379	17.88774422	1	179.2389706	6584.569853	1482.630515	19.03125	1.355494492	1.732784741	1.24046389	1.789631203
1508	29	11	11.40715116	18.35662527	5	182.5677656	6549.274725	1442.725275	19.09157509	1.40339037	1.808203533	1.27211763	1.819728717
1509	33	13	13.91197126	17.80382524	5	184.4745455	6502.489091	1394.927273	19.60181818	1.365706414	1.892922884	1.211575282	1.888266158
1510	26	10	14.95032749	16.22415173	1	187.0202206	6483.404412	1349.610294	20.00183824	1.387522116	1.8284394	1.232992105	1.831457883
1511	25	11	8.703590083	16.46385958	1	187.5630713	6496.153565	1349.343693	20	1.35126286	1.799276054	1.168954238	1.821528703
1512	26	11	7.537140381	17.34630001	5	188.2289377	6440.564103	1366.278388	20.496337	1.244074717	1.849355817	1.074299604	1.844371393
1513	26	11	4.774606083	18.83701011	3	189.8327206	6358.615809	1354.262868	21.45772059	0.860981047	1.784329814	0.762453169	1.785030264
1514	28	12	2.033184163	19.61012512	3	191.0127971	6303.667276	1341.915905	22.01645338	0.809016962	1.848901689	0.744361568	1.880697899
1515	17	8	2.633496065	18.3355752	3	191.6739927	6275.838828	1331.68315	22.58424908	0.830287073	1.870723493	0.790952608	1.92609486
1516	11	8	3.138187798	16.81537517	3	192.4440367	6298.2	1319.895413	23.13211009	0.774378651	1.814277405	0.729099411	1.801317042
1517	20	7	3.156516931	19.03355024	3	192.2715596	6301.677064	1312.445872	23.75045872	0.697521619	1.692417517	0.659120109	1.661933228
1518	13	8	4.212728222	18.58625027	3	190.59375	6260.211397	1299.525735	23.01470588	0.733402524	1.630523011	0.768284272	1.718135826
1519	17	10	3.978202066	16.4099501	3	190.5908257	6199.113761	1271.875229	23.00917431	0.741137326	1.50906489	0.847025901	1.584331505
1520	21	8	2.697369141	14.94520106	3	191.1158088	6184.382353	1241.477941	23.86948529	0.822897568	1.403774333	0.795630571	1.436103737
1521	18	12	2.224871143	15.19827508	3	191.5805861	6194.510989	1222.641026	25.86446886	0.854588769	1.221149199	0.775946613	1.205714516
1522	18	11	2.405869777	14.65352932	4	191.6029412	6204.825368	1227.762868	27.76654412	0.91274916	1.076608792	0.808919813	1.062609427
1523	15	17	2.126027111	17.31674977	4	190.466055	6163.192661	1265.517431	28.26055046	1.122585215	1.043269649	0.943148959	0.914632965
1524	11	16	1.348667162	17.23154968	4	190.664825	6106.587477	1290.777164	29.14732965	1.162256321	0.942304859	0.97493543	0.771787885
1525	11	18	1.059967614	17.68522462	6	192.6666667	6051.090239	1289.637201	30.84162063	0.786158178	0.606758246	0.745054659	0.735126786
1526	10	13	1.393789182	25.79972438	2	194.03125	5981.601103	1296.886029	32.26838235	0.688156471	0.435818514	0.702108346	0.655622326
1527	13	17	2.302372109	17.78202476	2	194.8713235	5893.663603	1308.735294	33.35661765	0.510896309	0.262224513	0.618089166	0.481511872
1528	25	17	3.948318421	19.94332484	2	196.519337	5860.232044	1308.268877	34.06445672	0.399246771	0.353623105	0.637648294	0.594533024
1529	15	14	2.575487662	15.83642111	4	197.6917431	5876.73578	1298.631193	34.86422018	0.239006507	0.660930905	0.505365552	0.941711776
1530	7	4	2.609515363	7.145144019	7	198.7310705	5875.436031	1285.146214	36.25848564	0.436209251	0.979640577	0.601638993	1.244714181
1541	33	16	10.39344867	20.56694097	5	178.107078	6739.241379	1524.068966	20.04718693	1.475242987	0.448558887	1.303559411	0.265269136
1542	40	15	8.593273201	18.91133332	7	180.190128	6734.140768	1512.656307	20.00548446	1.431382704	0.466228141	1.298509488	0.335443673
1543	37	14	10.87661115	18.17609983	1	179.7472527	6719.877289	1513.987179	20	1.492102116	1.095129568	1.399836367	1.053843445
1544	45	19	15.02096579	17.68432499	1	178.2058288	6714.821494	1517.817851	20.0564663	1.477854244	1.288287543	1.341834885	1.287879384
1545	45	16	13.4212323	17.64085853	5	179.8613139	6727.662409	1479.428832	20.6879562	1.443037815	1.3211101	1.265908229	1.28869977
1546	33	17	14.9206832	16.59477484	5	179.4635036	6746.206204	1466.715328	20.87043796	1.43349365	1.525717354	1.23529315	1.463541145
1547	30	15	12.28644529	17.2239747	5	178.1836364	6742.687273	1481.501818	20.80727273	1.458000131	1.553263269	1.304931569	1.514188778
1548	26	14	6.161216068	18.52397513	5	179.3254113	6722.199269	1481.321755	20.70932358	1.408816002	1.535445668	1.274806964	1.533556879
1549	31	17	5.137840028	19.43522501	5	180.0036765	6689.28125	1470.551471	20.02941176	1.316164643	1.45852986	1.213595676	1.510866451
1550	37	16	6.962148236	18.17089993	5	179.4327273	6660.167273	1456.123636	19.97454545	1.32099731	1.58292169	1.212491798	1.614220996
1551	34	14	6.468264442	17.87832506	5	179.6090909	6650.012727	1436.063636	19.83454545	1.292796388	1.647134051	1.175964379	1.654524028
1552	36	14	9.36202267	16.53845003	7	181.4716636	6607.473492	1404.054845	19.74954296	1.414753899	1.755613521	1.264253485	1.718906569
1553	32	12	13.04654203	17.12487499	1	183.2702206	6549.303309	1374.237132	19.97977941	1.41958707	1.840669614	1.262719765	1.798945489
1554	33	16	14.14834267	17.22879964	5	184.6345455	6498.630909	1358.027273	20.04909091	1.392773025	1.840204515	1.233886045	1.738152456
1555	29	12	13.35535381	17.21859635	1	185.2051282	6501.29304	1356.824176	20.27655678	1.278848201	1.802043475	1.132330954	1.720099223
1556	30	12	12.27451022	16.45919608	1	185.8864469	6460.09707	1363.849817	21.02014652	1.238647565	1.7742154	1.100056452	1.68995474
1557	37	11	9.248654663	16.36960006	3	188.132969	6398.544627	1340.074681	21.98178506	0.992774633	1.778011972	0.903911839	1.718908257
1558	21	7	2.278325958	21.3486398	3	188.8905109	6348.558394	1327.784672	22.64233577	0.758984253	1.83579205	0.769122705	1.875110465
1559	25	9	2.63573515	19.93839611	3	189.8592322	6316.601463	1309.018282	23	0.696693778	1.824940272	0.689597601	1.908366424
1560	33	12	3.332558991	20.72785004	3	190.4201835	6365.99633	1292.093578	23.06238532	0.940271789	1.838622952	0.819158666	1.909664025
1561	17	8	3.304007273	19.17475008	3	190.5376147	6393.32844	1273.981651	23.20733945	1.074133679	1.78807766	0.93213295	1.936012954
1562	16	9	5.425597071	19.23697523	3	188.7153285	6361.979927	1264.961679	23.00729927	0.830222923	1.678034931	0.756114161	1.774124241
1563	10	7	4.235470879	17.80555027	3	188.5311355	6294.437729	1239.212454	22.86996337	0.710642133	1.480668128	0.616266659	1.481426579
1564	22	11	3.806775911	17.22065027	3	188.5868373	6258.182815	1216.606947	22.97074954	0.509540612	1.155291224	0.302041646	0.988645433
1565	22	11	3.137107181	14.793728	5	188.9963303	6293.506422	1211.066055	24.35229358	0.692552924	1.217960149	0.572442786	1.201266265
1566	14	12	2.927816101	13.99605001	4	189.2087912	6307.018315	1224.57326	26.02564103	0.89773294	1.117195234	0.773265934	1.129252928
1567	17	17	2.623927142	15.62840007	2	189.1599265	6277.284926	1252.073529	27.28125	1.100309312	1.063258983	0.934267882	1.144220981
1568	14	13	2.428586218	15.2766499	4	190.2	6212.889908	1263.906422	28.55963303	1.008498222	0.903551775	0.941975036	1.01138967
1569	7	10	2.170601038	16.96063094	4	192.1222628	6151.40146	1260.421533	30.3540146	0.729634758	0.622245714	0.820062622	0.898917732
1570	15	11	3.059590358	15.23065467	1	193.0091575	6074.091575	1272.14652	31.26739927	0.832495924	0.464213271	0.977671689	0.840086544
1571	18	14	3.518641343	15.73739996	2	193.2619048	5959.239927	1295.368132	32.65567766	0.843391448	0.206665188	1.028146458	0.452878053
1572	19	17	4.17325516	17.8987251	2	194.2867647	5917.007353	1309.058824	33.70588235	0.692435591	0.221374803	0.921523553	0.473392528
1573	24	14	3.052867712	17.4034183	4	196.0073665	5962.85267	1298.80663	34.49355433	0.302050897	0.569947368	0.554390116	0.928471112
1574	3	1	2.488251762	6.924000019	7	196.9125	6000.975	1287.896875	36.065625	0.297686835	0.601412815	0.34000186	0.962370473
1585	40	15	13.9262931	17.59050012	1	176.8467153	6829.381387	1513.514599	20.31751825	1.393340892	0.537594399	1.287879162	0.388767608
1586	52	17	12.67121919	17.53719699	7	178.6527273	6818.858182	1492.161818	20.18	1.424312539	0.757235446	1.361651552	0.688794833
1587	36	17	11.81654186	19.89637471	5	178.6739526	6820.165756	1481.030965	20.03460838	1.44807083	1.050707421	1.377583906	1.021374952
1588	35	13	10.93581109	19.42364972	5	178.0618182	6822.314545	1469.821818	20.29636364	1.392893863	1.195026559	1.269999586	1.202633463
1589	43	16	7.07803545	21.90751233	7	179.9051095	6815.905109	1434.846715	21.20255474	1.343761468	1.220649487	1.177597307	1.186585598
1590	42	16	11.98534558	19.53312497	7	178.7626812	6825.673913	1428.842391	21.49637681	1.342937388	1.327616286	1.181404024	1.277599734
1591	35	16	8.769076094	17.90749986	7	179.2120658	6818.817185	1422.283364	21.35100548	1.405140018	1.369238794	1.257835656	1.334327661
1592	40	13	8.94008856	18.06190014	1	179.6545455	6788.529091	1427.849091	21	1.300341564	1.30599196	1.192579247	1.344269924
1593	36	16	6.898065111	18.4728753	1	179.3781818	6740.038182	1435.769091	20.57818182	0.982554406	1.11078279	0.94642188	1.254924498
1594	38	13	6.571122375	19.84242517	5	179.1846435	6698.52468	1418.787934	20.00731261	1.23065134	1.440120225	1.100363812	1.419252062
1595	40	13	8.948677856	18.45287499	5	178.9926874	6678.904936	1400.773309	19.99085923	1.360342115	1.560528964	1.196111396	1.478536278
1596	32	12	11.40672679	17.85283175	3	180.1781818	6669.601818	1372.998182	19.94	1.485156423	1.572198409	1.259811565	1.457439251
1597	26	14	13.25129998	17.87219963	3	180.9087591	6631.90146	1356.357664	19.99635036	1.413105226	1.775409985	1.268699306	1.647253913
1598	33	13	10.11747076	17.99909971	1	181.6183486	6574.711927	1344.343119	20.57981651	1.294293988	1.755946654	1.191844977	1.528170399
1599	27	13	9.815004221	18.38004992	5	182.1490909	6546.570909	1345.563636	20.99090909	1.223557585	1.807588941	1.158394724	1.636502087
1600	26	9	12.03872044	17.62023738	3	184.4608379	6513.945355	1334.581056	21.51001821	1.106114215	1.850487572	1.009708215	1.729227573
1601	29	12	11.50909282	14.88750681	5	186.0054845	6485.758684	1320.140768	22.01462523	0.829792666	1.879325113	0.80481239	1.813595593
1602	29	14	6.277407749	19.9253999	3	186.7814208	6464.921676	1312.73224	22.72495446	0.59987077	1.90664044	0.707723275	1.882355057
1603	22	13	4.915108402	20.46997503	3	187.3467153	6432.812044	1292.405109	23.00182482	0.806156871	1.88695938	0.8092926	1.911077045
1604	29	12	2.282254553	21.39718615	3	187.9102564	6465.199634	1265.978022	23.02014652	0.973960979	1.856975169	0.79776426	1.905511093
1605	30	12	3.369707309	18.57148348	3	188.9616788	6514.793796	1237.494526	23.05109489	1.094255301	1.831735885	0.861198239	1.910313241
1606	20	13	4.881320468	19.12230011	5	187.7285974	6475.018215	1226.664845	22.95992714	0.870203492	1.702483702	0.774858575	1.743978091
1607	17	8	4.19449378	18.24215037	3	186.4194139	6402.509158	1213.96337	22.24542125	0.804196513	1.541871715	0.737328671	1.56965328
1608	20	9	3.992557418	16.83017613	3	186.3315018	6362.122711	1196.840659	22.22161172	0.638269783	1.137880552	0.516427606	1.056994756
1609	14	8	4.726740501	16.17270013	3	186.9744059	6413.296161	1198.367459	23.34552102	0.936157069	1.287928361	0.782610953	1.226158328
1610	21	8	6.865315558	16.46305001	5	187.0934066	6424.70696	1216.338828	24.86080586	1.107304335	1.186775047	0.941609796	1.262464501
1611	16	9	6.077291746	15.9359649	5	187.3533698	6392.391621	1243.504554	26.48087432	1.306293309	1.119074243	1.072610315	1.361224979
1612	20	16	3.662231206	15.20550001	4	188.8915441	6294.351103	1245.950368	27.75919118	0.913151088	0.992171843	0.942186347	1.238984466
1613	17	15	2.980494463	16.54097497	4	190.8032787	6203.89071	1242.404372	29.07103825	0.794132757	0.78558529	0.986328669	1.102974173
1614	16	8	3.40990907	13.26704988	5	191.466055	6126.187156	1255.086239	29.99816514	1.042396098	0.64956065	1.217718311	0.950842671
1615	16	16	2.321344516	15.27274992	2	192.3290441	6037.102941	1277.558824	31.60294118	0.982749896	0.478879056	1.235777277	0.812194347
1616	20	15	2.660416323	14.76847493	2	192.7755474	6011.297445	1298.377737	33.05109489	0.794002905	0.394859911	1.119931452	0.753068648
1617	24	16	2.385850184	22.84038248	4	193.8913444	6031.878453	1295.93186	34.32228361	0.517062027	0.645052277	0.851230409	0.989535861
1618	7	2	2.130247584	10.59421782	7	194.1257485	6054.828343	1293.259481	36.10778443	0.510790831	0.632183133	0.63200007	0.986563912
1629	37	15	11.22815711	19.30687494	5	176.0905797	6915.597826	1492.211957	20.76630435	0.810829725	0.426282844	0.659959299	0.273311384
1630	43	15	6.210661089	21.69984917	5	177.8856624	6905.811252	1463.631579	20.82940109	1.559983605	0.852796999	1.571647811	0.777716756
1631	45	16	9.179315624	20.90209971	3	177.6781818	6909.050909	1450.829091	20.51272727	1.441638447	1.011157982	1.403244995	0.980426289
1632	40	18	9.05370181	20.43952494	5	177.4663024	6911.298725	1436.029144	20.87978142	1.268388763	1.076626725	1.156632245	1.049130548
1633	31	14	7.405768235	21.51903883	7	178.5597826	6903.318841	1409.025362	21.69927536	1.270103924	1.04602772	1.11410334	0.982777383
1634	41	18	11.67346749	20.93868432	7	179.0145719	6893.284153	1388.817851	22	1.23267796	1.186268514	1.075015312	1.156018931
1635	40	13	12.13967547	20.19190943	7	180.0381818	6887.934545	1372.109091	21.98727273	1.123509832	1.137409955	0.94940754	1.126440406
1636	39	13	8.994653324	18.9297999	7	180.5136116	6859.283122	1371.901996	21.48094374	1.112821013	1.179150179	0.973356754	1.218224458
1637	36	17	8.853162888	19.42627501	7	179.4090909	6816.42	1385.496364	20.92545455	1.118071489	1.154527597	0.9940046	1.175108671
1638	35	13	9.142736297	19.43819108	5	178.9692029	6762.313406	1381.612319	20.19384058	1.254980642	1.384533417	1.08834663	1.303268564
1639	35	13	8.83113081	19.82385002	5	178.6448087	6739.001821	1375.624772	20	1.338307887	1.469210237	1.166658565	1.341134116
1640	36	16	9.737501199	19.32307475	3	178.4972678	6737.063752	1366.10929	20	1.449402854	1.521578208	1.279783331	1.370357469
1641	35	13	12.07927081	19.10462475	5	178.4936479	6719.631579	1351.010889	20	1.394658864	1.650240546	1.309119403	1.439551878
1642	38	13	9.830656211	18.27340002	3	178.8475499	6664.083485	1335.030853	20.77495463	1.322913274	1.74032934	1.27135995	1.463518418
1643	34	17	11.43785883	17.2085999	3	179.9032847	6625.919708	1323.321168	21.00729927	1.150290046	1.813997626	1.085970249	1.593511626
1644	35	11	12.77426391	17.1270919	3	182.1909091	6609.305455	1304.714545	21.49272727	0.971507579	1.950025328	0.820348429	1.792537145
1645	38	18	13.81486037	18.5545499	5	183.2189781	6585.874088	1291.892336	22.05109489	0.784102994	1.977530885	0.651952182	1.836368197
1646	29	12	11.56629206	17.34082506	3	183.9945255	6566.779197	1283.671533	22.87043796	0.643947005	1.964683197	0.589787994	1.850865088
1647	28	14	7.807843275	18.32405009	3	184.1861314	6539.956204	1269.406934	23.00547445	0.756827217	1.843127415	0.693008389	1.783377104
1648	30	12	2.90915708	20.04222515	3	185.1127273	6570.107273	1240.845455	23.03818182	0.784749487	1.798604131	0.674029532	1.776133776
1649	30	13	2.664460707	18.82974943	3	186.3727273	6581.62	1213.763636	23	0.637365129	1.648596056	0.524169538	1.620515235
1650	25	10	2.704055399	17.18612681	3	186.7655678	6574.490842	1197.263736	22.97985348	0.616828548	1.517548159	0.577569449	1.532013446
1651	12	10	5.436192044	18.38392539	5	184.9781421	6535.482696	1197.076503	22.43533698	0.853216104	1.686505057	0.788156845	1.677384764
1652	13	8	4.182364886	16.51195026	3	185.369287	6525.780622	1185.210238	22.2047532	1.077307981	1.525064129	0.931191367	1.404571635
1653	12	7	4.099386784	17.10619065	3	185.5327273	6559.983636	1185.770909	22.79818182	1.331827298	1.373388998	1.066883028	1.135615908
1654	19	13	6.854530184	16.94947502	5	185.4509091	6530.569091	1201.098182	23.94181818	1.226701185	1.266007908	1.070101365	1.271056078
1655	14	10	5.761416584	16.70754993	4	185.583181	6475.318099	1221.115174	25.46252285	1.20058161	1.153308623	1.0560169	1.264915943
1656	14	13	3.102232838	14.66667507	4	187.0182815	6361.758684	1224.045704	26.76234004	0.935033736	1.034409845	0.995343903	1.209854573
1657	17	14	4.45095981	15.30442508	4	188.9137615	6249.354128	1224.772477	27.96697248	0.910791494	1.035235632	1.068301704	1.239695221
1658	12	8	3.736217542	15.60067497	5	189.9854281	6175.989071	1237.466302	29.07650273	1.086623449	1.110350993	1.194799379	1.270608231
1659	15	16	4.016991283	15.03438587	2	190.856102	6119.182149	1262.24408	30.58652095	0.904688177	0.865200943	1.248252428	1.117596042
1660	30	18	3.050443437	13.61817478	2	191.9157509	6104.630037	1279.344322	32.14285714	0.792413253	0.705111135	1.235443048	1.026754111
1661	26	15	2.113612831	18.39589461	6	192.393053	6104.255941	1283.853748	33.49908592	0.718092509	0.751246639	1.100279938	1.108292118
1662	20	8	2.298816227	12.78773465	7	192.0982318	6121.222004	1290.001965	35.1237721	0.778155059	0.746804541	0.936962981	1.031148124
1663	6	3	4.961036321	12.94406763	2	191.49	6137.47	1292.89	35.97	1.010118276	0.77831994	1.006744911	0.985249937
1673	32	15	9.23242916	20.82391288	5	174.9310345	6991.3049	1464.370236	21	1.213958245	0.522287879	1.171565408	0.380900645
1674	35	16	8.382610667	20.3011279	7	175.9818512	6994.430127	1444.722323	20.95825771	1.448654932	0.857337016	1.430966902	0.764657129
1675	40	15	7.137735745	20.74987469	7	176.7663043	6990.717391	1421.666667	20.97826087	1.355084546	1.017007403	1.329837006	0.968061572
1676	27	10	6.008380683	22.02212501	7	177.0961887	6994.00726	1405.548094	21.16878403	1.155252121	1.029717244	1.023088136	0.970471203
1677	32	13	6.741825073	20.48542514	7	176.875	6972.04529	1392.958333	21.92391304	1.060614057	1.070428967	0.86797947	1.044596592
1678	35	14	7.257008017	20.67488547	7	178.7934783	6953.398551	1362.228261	22	0.998510793	1.07289952	0.760191686	1.052944667
1679	34	12	11.42534402	20.51126258	5	181.2218182	6950.745455	1325.303636	22.03454545	0.881665763	1.10275647	0.60820217	1.115321678
1680	35	12	14.93373922	19.52209054	7	180.43898	6927.08561	1338.15847	21.65391621	0.986870751	1.24068813	0.795509455	1.278310043
1681	38	11	6.607046144	21.26637479	5	179.9855072	6901.376812	1343.913043	20.98731884	1.229934618	1.181249388	1.087969214	1.183953059
1682	33	8	4.491646279	20.08095232	7	180.5985401	6886.737226	1337.113139	20.16240876	1.489375067	1.176929906	1.435142436	1.033834736
1683	25	9	5.060627242	21.01191923	7	180.2133816	6839.19349	1347.743219	20.01084991	1.356982514	1.210808501	1.183152699	0.974998331
1684	32	14	6.546402897	21.22072501	7	178.4781818	6815.865455	1358.449091	20.40545455	1.39194636	1.399372675	1.242577839	1.1748285
1685	29	13	7.051815367	21.15268334	7	177.5509091	6816.032727	1346.950909	20.56909091	1.366056681	1.556848538	1.264134059	1.279737773
1686	28	13	8.092902841	19.58027633	5	176.7290909	6767.667273	1337.249091	20.92727273	1.257732935	1.607985668	1.127479619	1.334505093
1687	32	18	6.555724122	19.14087501	7	179.3242754	6731.324275	1300.916667	21	0.994165998	1.669853739	0.793877617	1.443791759
1688	31	11	8.980874778	18.19486905	5	180.5127737	6711.235401	1273.974453	21.10948905	0.716044769	1.790576763	0.38430967	1.601118106
1689	34	17	14.32082734	18.35982489	5	180.6569873	6663.025408	1254.041742	21.90562613	0.721023425	2.005990857	0.428250386	1.776590915
1690	25	10	12.90316579	19.58302501	3	180.6465201	6615.35348	1250.595238	22.76373626	0.63780443	2.008951716	0.447495964	1.801122069
1691	27	11	12.27625603	18.56527488	3	181.2373188	6629.70471	1244.929348	23.01268116	0.60558654	1.765781246	0.534805153	1.689853358
1692	26	13	6.221602745	19.8019299	3	181.5490909	6651.24	1223.092727	23	0.64221535	1.795302719	0.532959282	1.719237018
1693	30	13	2.666062069	19.11883557	5	183.8281536	6653.195612	1196.009141	23	0.537397921	1.577563249	0.499738105	1.574073845
1694	24	6	3.067921715	17.42272744	3	185.7332123	6653.490018	1175.537205	22.98366606	0.121368384	1.225143462	0.273703583	1.446245784
1695	19	10	5.492328698	18.21457536	5	184.431694	6646.602914	1181.672131	22.18214936	0.536300385	1.309079349	0.580567329	1.407861185
1696	17	11	5.827549599	17.16785012	5	184.6327273	6639.28	1179.214545	22.01636364	1.148463446	1.299900872	1.078456061	1.210003228
1697	44	17	5.550955718	16.81648233	5	185.9489051	6640.822993	1169.607664	22.76277372	1.253608085	1.27533967	1.149643338	1.160356742
1698	31	12	7.061641783	18.07146847	5	185.4065934	6600.294872	1174.419414	23.24175824	1.165023848	1.254547812	1.073168325	1.22342248
1699	34	16	5.046235964	16.83037503	4	185.1503623	6533.751812	1179.806159	24.50905797	0.937376514	1.161166452	0.831436668	1.182360864
1700	20	16	4.608475279	14.50622512	4	185.4069343	6438.593066	1192.027372	25.56934307	0.867459178	1.044312447	0.896039205	1.117164893
1701	15	11	2.982962285	14.62897244	2	187.2969035	6313.351548	1201.593807	26.72859745	1.07601149	1.193058461	1.148289251	1.269817108
1702	17	17	3.578689703	14.22337488	2	188.654479	6225.393053	1218.665448	27.83729433	1.133058153	1.298370056	1.253463537	1.406664729
1703	26	13	5.037978873	15.81009997	2	190.3923358	6197.180657	1240.934307	28.99270073	0.885801628	1.018433508	1.25358386	1.237561498
1704	27	13	2.510335721	17.39313289	6	191.7481752	6176.056569	1255.569343	30.79744526	0.688224729	0.82832488	1.144758362	1.206497562
1705	22	15	2.616392357	18.70897491	6	191.9361314	6180.093066	1265.00365	33.00729927	0.612239663	0.769031074	1.013433754	1.177998823
1706	15	10	3.170476183	12.63994596	7	191.6109023	6187.325188	1274.105263	35.05075188	0.728371881	0.984201025	1.038684317	1.308247107
1717	34	14	8.075857094	20.83778962	7	173.9909747	7069.559567	1437.805054	21	1.173699185	0.275659268	1.094321832	0.131573556
1718	43	16	6.161544899	20.23832078	7	174.5	7075.928058	1423.649281	20.95503597	1.280000973	0.615325767	1.226266059	0.504288702
1719	44	12	5.563127847	19.76968985	7	174.9764065	7068.368421	1402.45735	20.82577132	1.349861383	0.978178218	1.374020293	0.944707137
1720	25	6	5.225813069	17.14987391	7	175.8734177	7057.542495	1387.629295	21.05424955	1.126653261	1.05214205	1.010743245	1.104863957
1721	17	8	4.706703196	19.33641903	7	176.0727273	7026.036364	1378.110909	21.37454545	1.032187574	1.127671927	0.822897691	1.127719305
1722	42	13	4.437564506	20.1385677	7	177.4205776	6987.66065	1363.595668	21.6534296	0.96202099	1.20408783	0.702457029	1.189116907
1723	26	10	4.533665784	20.7321483	5	181.1088929	6975.482759	1327.439201	21.89655172	0.692355037	1.089272559	0.464725103	1.117092229
1724	38	10	9.374470756	19.70330671	3	180.566787	6979.936823	1334.288809	21.52527076	0.800207	1.259127319	0.519047648	1.277583741
1725	38	13	9.65572971	19.80115788	5	179.9745917	6985.502722	1332.268603	20.5353902	0.966805827	1.232327737	0.749087205	1.260386966
1726	28	6	5.166590559	20.57526313	7	181.2238267	6995.563177	1311.388087	20	1.444125366	0.955319163	1.167528155	0.89823747
1727	30	8	3.390964306	20.29075182	7	179.8094374	6925.076225	1344.526316	20.27041742	1.212078512	0.915170286	0.949301563	0.684703644
1728	33	7	5.155000558	21.39539994	7	177.9763636	6877.714545	1363.689091	20.97636364	1.34179917	1.376160577	1.07737983	1.184358507
1729	42	15	3.833461937	21.13164989	5	176.8242754	6869.349638	1359.548913	21.07065217	1.330400914	1.460617554	1.129280818	1.256042421
1730	20	15	4.242471071	20.21787482	7	176.1415608	6850.745917	1342.388385	21.08166969	1.178449184	1.415998019	1.012254234	1.182424642
1731	30	15	5.319238748	18.30959998	7	177.2181818	6826.374545	1302.112727	21	0.821884001	1.452983357	0.586118794	1.245378636
1732	27	15	8.761955767	18.24826957	1	179.1048825	6808.705244	1243.135624	21.07594937	0.542874921	1.583865486	0.331634665	1.370734468
1733	32	15	10.36295836	18.96658471	5	180.5883424	6761.724954	1199.473588	21.87795993	0.731230271	1.692475843	0.567889984	1.420516407
1734	41	16	14.69357773	17.02884998	5	179.0362976	6699.907441	1223.157895	22.04355717	0.780085396	1.725024618	0.685939506	1.514316715
1735	24	11	16.02240595	16.60730007	3	178.6231884	6685.567029	1233.842391	22.32789855	0.770866998	1.717979103	0.718744196	1.591205612
1736	27	13	9.987582746	18.35335009	3	179.0672727	6693.269091	1213.98	22.45090909	0.631363986	1.784605885	0.474885273	1.64813661
1737	21	7	9.182438656	18.27104336	3	181.8677536	6699.889493	1183.898551	22.4673913	0.495368974	1.626927949	0.355442049	1.550518513
1738	21	10	3.821044043	19.81092523	3	183.7668488	6714.08561	1167.790528	22.16575592	0.296422631	1.299322315	0.454287985	1.43920166
1739	19	11	4.634663491	18.73122509	5	183.6733212	6723	1169.591652	21.77858439	0.698758464	1.335675851	0.761613956	1.336817071
1740	22	8	3.664865537	17.17157887	5	184.8638838	6710.802178	1163.477314	21.57350272	1.094028348	1.32458517	1.02777966	1.251440418
1741	30	13	5.923412066	18.44547526	5	184.4018182	6684.410909	1167.887273	21.75272727	1.182285517	1.340942748	1.107082926	1.28041283
1742	22	16	7.252702391	16.8768344	5	183.7681159	6649.963768	1163.373188	22.28442029	1.115042806	1.286522649	1.116265818	1.288073137
1743	22	14	8.6561462	15.26570016	4	184.3327273	6587.227273	1150.454545	23.34363636	0.839902904	1.19685068	0.963550331	1.203598239
1744	28	13	7.346311424	16.67322499	3	185.6892139	6488.446069	1153.824497	24.38756856	0.917207369	1.153089887	1.140303934	1.204186481
1745	32	16	7.264240493	16.30408524	3	187.3375681	6391.393829	1175.911071	25.32667877	1.169204473	1.221927844	1.37237604	1.326873235
1746	31	14	5.677492112	15.78155383	3	189.1186131	6318.224453	1196.874088	26.21350365	1.226046793	1.213286735	1.426022552	1.308976047
1747	16	12	3.574407223	16.19907502	3	190.2495446	6288.411658	1219.79235	27.41530055	1.095277151	1.082758182	1.318180496	1.175658202
1748	16	20	2.102534396	15.82033097	4	191.1785064	6255.493625	1233.903461	29.93806922	0.671703547	0.916523077	1.097506907	1.385170802
1749	15	13	3.003859775	18.29454986	6	191.6909091	6245.643636	1244.618182	32.85272727	0.472202778	0.684590135	0.917338729	1.133828826
1750	18	8	3.846745241	12.68876634	4	191.2397004	6260.543071	1257.876404	35.52621723	0.630618866	0.875208926	1.032667559	1.159229569
1751	10	4	3.072578636	7.050684249	7	190.9172662	6264.115108	1265.719424	37.32733813	0.760419355	1.145940529	0.991308171	1.43566395
1761	26	9	4.773895519	17.57946949	7	172.7300725	7158.251812	1417.123188	21.00362319	1.266226786	0.588986335	1.223359086	0.591434909
1762	43	13	6.77824563	19.89595953	7	173.2536232	7172.699275	1405.711957	20.99637681	1.281581979	0.802914594	1.216610247	0.808819437
1763	36	16	3.548502276	22.83897673	7	174.2133816	7151.824593	1384.947559	20.99095841	1.340464669	1.146002737	1.304870263	1.256849196
1764	25	9	4.158409023	18.07092546	5	175.0396396	7123.594595	1384.032432	20.5981982	1.130147451	1.17968747	1.066606212	1.440083057
1765	25	10	6.813255943	22.15907284	7	174.2779783	7067.027076	1396.684116	20.27978339	1.024375084	1.145778632	0.894815065	1.209318124
1766	33	14	11.64484918	20.71837515	5	175.2477396	7020.551537	1396.191682	20.61301989	0.883981345	1.163538613	0.702530819	1.1321549
1767	38	18	18.1549267	19.29351331	5	176.1464738	7006.072333	1396.186257	21.12658228	0.787447914	1.148462367	0.58346156	1.130963162
1768	32	16	21.53088434	16.38969875	3	175.8297101	7016.54529	1393.744565	21.13949275	0.785572958	1.248066938	0.592349518	1.227755032
1769	37	17	17.92896291	15.2670496	1	175.1119134	7022.236462	1378.868231	20.24548736	0.866268751	1.280692947	0.692027736	1.25451462
1770	33	7	10.93694093	18.64096845	1	176.7916667	7003.539855	1358.257246	20.05797101	0.818235149	1.086369722	0.519375405	1.027684134
1771	40	14	11.99984603	18.55648098	1	175.9801444	6946.532491	1382.445848	20.72924188	0.989972457	1.112332806	0.695221679	0.992385201
1772	31	10	12.25330122	18.92627557	1	174.3514493	6913.193841	1403.371377	21.48369565	1.293796718	1.380865675	1.056009091	1.197166562
1773	36	16	9.017049057	18.6850248	3	173.8602541	6914.520871	1395.493648	21.87295826	1.199210129	1.345679975	1.014971939	1.169489825
1774	38	16	9.917479048	19.38777477	5	173.698556	6925.173285	1374.32852	21.90613718	1.029766622	1.223278713	0.899690762	1.064641051
1775	36	17	9.05029728	17.63804504	3	174.5688406	6899.07971	1325.193841	21.52173913	0.842236966	1.3055233	0.71933556	1.149622783
1776	31	7	11.46577129	18.27740524	3	178.2047101	6898.076087	1237.561594	21.70108696	0.663603586	1.258573672	0.596131338	1.020104278
1777	25	10	14.50176064	17.38757182	5	179.5577617	6861.918773	1191.418773	21.9566787	0.710943847	1.265173821	0.613766065	1.044512746
1778	33	15	18.35533189	16.19368981	5	177.6032609	6779.298913	1219.28442	21.33152174	0.786918446	1.473623145	0.651275788	1.327302337
1779	33	15	19.02949519	14.40937505	1	177.030853	6731.784029	1232.430127	21.24500907	0.728599991	1.585338306	0.545723345	1.432492904
1780	31	19	14.53404	14.23582499	5	178.6690778	6724.153707	1202.475588	21.45388788	0.477330139	1.659874277	0.269027873	1.47982769
1781	27	7	7.847636227	19.11228649	3	180.7181818	6718.607273	1175.821818	21.78909091	0.551558448	1.510574967	0.33991213	1.232746474
1782	35	12	6.796393277	20.23677523	3	181.1844485	6741.875226	1169.582278	21.45750452	0.722611436	1.48385393	0.582437485	1.317901373
1783	30	9	6.007552904	19.48737508	3	182.8327273	6776.867273	1159.02	20.97090909	0.916676089	1.455817801	0.861192558	1.300320625
1784	27	10	4.33290665	17.71507502	5	183.4954628	6774.30853	1158.856624	20.51905626	1.094902997	1.435461087	1.027479795	1.287317407
1785	22	15	7.180691968	16.98805029	5	182.4981884	6731.788043	1167.804348	20.76449275	1.2121279	1.393828136	1.137726247	1.306330502
1786	22	14	7.696532513	16.99170015	5	182.6193078	6702.357013	1154.205829	21.36429872	1.216808921	1.34356268	1.243254304	1.315772168
1787	19	13	9.625235005	15.49490011	5	183.5479204	6631.528029	1135.332731	22.22965642	1.247525364	1.200086999	1.365591511	1.16100774
1788	39	13	6.894753417	17.02105008	3	185.2072727	6542.289091	1140.514545	23.13090909	1.307457142	1.188498125	1.53358317	1.201194328
1789	13	8	7.207126767	16.33095725	5	186.6812386	6465.191257	1168.91439	23.79052823	1.325069243	1.28297599	1.516359925	1.347064361
1790	24	12	6.750650225	13.00477492	3	188.1690909	6403.456364	1193.554545	24.64727273	1.360093921	1.284896982	1.515298061	1.320502639
1791	17	12	3.58698872	15.15779984	3	189.1129326	6357.147541	1213.001821	26.10746812	1.297016139	1.218611789	1.391396713	1.238822681
1792	21	14	2.620195713	15.35139996	4	190.4909091	6321.290909	1219.790909	28.91636364	1.036294651	1.069415206	1.383056983	1.266499862
1793	21	15	2.784248002	16.41585001	4	190.7441016	6320.446461	1233.410163	32.25771325	0.789959571	0.954316872	1.252044797	1.23672156
1794	21	8	2.590575887	17.74171362	4	190.6939891	6343.739526	1246.918033	35.88160291	0.699537647	0.845324013	1.233285494	1.15164452
1795	12	2	3.240435329	9.108575789	7	190.0437262	6331.965779	1259.80038	38.11787072	0.554351653	1.125707703	0.919694126	1.395946685
1805	38	11	4.231599484	22.39040121	7	171.8655914	7259.362007	1398.949821	21	1.317137696	0.865285344	1.187240362	0.831596859
1806	39	14	3.845311523	22.98642306	7	171.9423423	7269.340541	1397.032432	21	1.282342708	1.029165399	1.150156695	1.002848652
1807	36	14	5.486842779	21.66806754	7	172.8992806	7241.541367	1384.922662	20.84352518	1.288468488	1.269614242	1.188715089	1.355967455
1808	36	17	13.00650947	21.17433581	5	173.0671506	7194.760436	1398.393829	19.69872958	1.107297145	1.269671425	0.98452808	1.363136455
1809	37	14	12.59766966	20.97082683	5	172.7225225	7111.969369	1415.940541	18.58198198	1.004843786	1.294482753	0.89354115	1.313683882
1810	40	16	15.79933785	21.26644968	6	173.563964	7047.567568	1421.924324	18.72792793	0.855492929	1.279744858	0.716865236	1.205528998
1811	40	16	15.97044733	19.59638168	3	172.2509025	7046.243682	1433.884477	20.07220217	0.78613171	1.371336639	0.579061598	1.32614056
1812	32	14	14.1508222	17.38969989	5	171.3788151	7063.423698	1424.254937	20.9048474	0.820733573	1.390407644	0.56706731	1.332055956
1813	26	14	13.42681667	16.18322395	5	170.3453888	7052.793852	1410.654611	20.48101266	0.817060482	1.39798338	0.514884649	1.297927797
1814	26	14	15.20151574	15.33284564	3	171.7775769	6991.390597	1405.086799	20.53164557	0.750399148	1.329709232	0.453581177	1.225846195
1815	34	15	10.10301239	17.26125309	3	169.4558559	6939.340541	1439.389189	20.97837838	0.97413253	1.269950554	0.736768734	1.147191256
1816	37	9	12.68705325	16.60413683	3	169.074141	6931.837251	1444.461121	21.18444846	1.120357729	1.189139672	0.848684464	0.998866308
1817	35	15	13.01288046	17.66394483	3	168.5117117	6959.927928	1444.372973	21.77297297	1.134439966	1.173073667	0.989277583	0.98841823
1818	21	9	9.245669327	17.97075346	3	168.6606171	6966.952813	1429.259528	21.99455535	0.960137092	1.122695826	0.87225271	0.997844595
1819	29	16	10.22457292	19.18560572	3	170.381982	6946.209009	1370.207207	21.81621622	0.90960316	1.214359269	0.785426173	1.13171459
1820	33	12	13.83847117	18.87516025	3	174.6775362	6949.641304	1284.769928	21.75543478	0.815244567	1.179154973	0.734876305	1.118228044
1821	27	10	10.1009708	18.58022855	3	175.5791367	6916.656475	1250.983813	21.22302158	0.806938389	1.123524639	0.713670635	1.024664098
1822	38	18	11.90083855	16.27042609	3	175.8804348	6849.471014	1241.266304	20.85144928	0.810613539	1.180035107	0.644319504	1.038708363
1823	25	14	20.478775	11.96987209	1	174.868231	6793.891697	1244.131769	20.18411552	0.518682649	1.374922283	0.29270933	1.214957893
1824	33	17	18.36997178	14.21927294	5	176.5771325	6767.333938	1209.664247	20.29764065	0.187276018	1.462703818	-0.054377788	1.234154582
1825	27	10	9.019561505	19.98000013	3	178.6552347	6751.770758	1181.873646	20.95306859	0.795753662	1.359359302	0.584985442	1.091657814
1826	31	11	6.967170882	18.85075413	3	180.0326087	6784.78442	1161.807971	20.99818841	0.830441881	1.460184403	0.655844625	1.255832836
1827	35	12	7.777911724	21.0859802	3	181.9909747	6822.31769	1145.48917	20.94223827	0.909708165	1.532868303	0.800737672	1.3869844
1828	41	15	6.517628286	20.01577513	5	181.0942029	6812.79529	1163.278986	20.04528986	1.024165735	1.522769445	0.958663607	1.429067177
1829	18	11	5.174291757	18.63640022	5	180.7345455	6795.24	1165.88	20.00909091	1.26947958	1.441751122	1.259876288	1.4031974
1830	33	16	6.927866216	18.10640005	5	180.7751799	6773.147482	1155.890288	20.54856115	1.417406082	1.383203089	1.444168627	1.362959661
1831	29	13	8.353346794	16.20097498	5	182.4416058	6697.104015	1138.012774	21.37591241	1.386534624	1.35029234	1.458546482	1.334182911
1832	25	13	7.246212492	14.54643219	5	183.6352087	6609.047187	1147.190563	22.04355717	1.328349417	1.349839634	1.478000933	1.382912165
1833	16	11	8.021032593	14.8039501	3	185.9710669	6538.998192	1167.41953	22.6437613	1.410775118	1.332010731	1.590197809	1.358228289
1834	22	13	6.224389455	14.61754998	3	187.3811252	6480.735027	1195.92922	23.33393829	1.580125019	1.369226746	1.748358727	1.346672162
1835	21	13	5.12695945	14.90070532	3	188.2649728	6420.834846	1205.094374	25.05989111	1.404275143	1.312826997	1.548992229	1.320631725
1836	23	17	2.86603369	14.97422503	4	188.7731397	6377.404719	1213.00363	27.65880218	1.300740339	1.195438348	1.574820302	1.27648443
1837	21	16	3.153956362	15.43585432	1	189.3690909	6390.156364	1227.48	31.00545455	1.10255241	1.226150505	1.476152539	1.346429102
1838	31	15	2.594499764	18.44919205	6	189.5615942	6411.693841	1245.389493	34.67753623	0.817637142	1.149914376	1.312133126	1.341506809
1839	20	6	2.222924698	20.09178655	6	189.0473588	6389.874317	1258.874317	36.84881603	0.662974764	1.322037522	1.053956656	1.50999238
1840	3	1	3.872974106	10.24233343	7	188.3222591	6352.126246	1272.312292	37.08637874	0.634904611	1.687787795	0.841019601	1.929172377
1849	31	13	3.468801255	21.62125002	7	170.3688969	7359.620253	1394.468354	21.36708861	1.429116882	0.963662006	1.241948891	0.937276626
1850	38	12	7.674523917	21.8204497	5	169.8543165	7367.467626	1409.214029	21.02338129	1.291345841	1.068258253	1.114798424	1.064377103
1851	32	14	10.58097208	22.8718133	5	170.6642729	7343.965889	1407.337522	20.24057451	1.098495692	1.181302778	0.91007095	1.213841748
1852	41	12	10.19727526	22.88203	3	172.3003597	7284.638489	1403.386691	19.4676259	0.991370011	1.280408032	0.792280033	1.293585831
1853	29	16	16.68253099	21.59017473	3	171.0180505	7180.055957	1428.837545	17.75451264	0.994357456	1.400645576	0.851382867	1.402781749
1854	37	16	12.40627742	20.55473673	5	171.9028777	7108.492806	1438.478417	17.97302158	0.994622853	1.490644419	0.906353624	1.455846524
1855	29	15	12.29899778	20.15680872	5	169.8273381	7096.440647	1454.241007	19.51618705	0.790727582	1.558968201	0.558106136	1.535659701
1856	35	7	10.65386923	16.63229769	5	167.3200723	7093.951175	1444.405063	20.13743219	0.717395835	1.554122418	0.41747447	1.494000417
1857	33	14	16.43721161	11.63254635	7	168.2086331	7068.517986	1414.489209	20.17446043	0.508121053	1.386898682	0.121158654	1.270839548
1858	28	15	19.97926115	14.58858214	3	167.2146691	6994.565295	1436.304114	20.25939177	0.782603365	1.373345059	0.496983527	1.336128049
1859	29	16	12.04841369	18.13979753	3	165.005425	6959.276673	1468.936709	20.51175407	0.972118419	1.297192521	0.750087911	1.240245664
1860	33	16	13.44865653	16.54352399	3	166.0253165	7000.9783	1459.245931	20.920434	1.028137084	1.139225967	0.839182246	1.02294901
1861	24	17	12.207006	18.46092525	3	165.6216216	7010.427027	1458.713514	21.15315315	1.141730809	1.155929506	0.960349009	0.942965474
1862	34	14	10.70001807	18.57656673	3	166.2823741	6995.732014	1441.811151	21.89208633	1.140025608	1.207975671	1.023790053	1.040812552
1863	27	9	9.660089917	18.12359319	3	168.7631103	6977.088608	1375.594937	21.66546112	1.071544021	1.226869948	0.874812219	1.174242425
1864	27	14	13.37543131	18.46949253	3	170.1182796	6949.817204	1330.265233	21.16845878	0.906801581	1.22425238	0.729773563	1.165966415
1865	30	17	12.88107379	18.49535017	3	170.0235507	6912.108696	1311.833333	20.69746377	0.858658195	1.187013376	0.712556646	1.094923716
1866	33	15	11.00700036	18.33997504	3	171.3146474	6883.660036	1289.962025	20.04701627	0.985301904	1.085598648	0.827135289	0.960804877
1867	35	16	14.39781803	17.64125005	3	173.9584087	6849.037975	1253.895118	20.00180832	0.796886144	1.352213368	0.666449724	1.250617647
1868	30	14	14.66826237	17.51566417	3	175.8267148	6822.097473	1216.49278	20	0.567891719	1.51550191	0.424950831	1.349161329
1869	41	15	15.89592138	17.11176728	5	176.3585586	6823.655856	1195.452252	20.13693694	0.713515215	1.448325917	0.513349061	1.253008854
1870	29	9	13.10394815	17.84207512	3	178.4864376	6860.323689	1162.82821	20.81555154	0.788014665	1.554633573	0.619066645	1.372312403
1871	35	14	8.395724145	18.97133864	3	180.6980108	6877.016275	1141.632911	20.89511754	0.928892314	1.59056095	0.80762721	1.449067014
1872	30	14	8.739037937	18.20105018	3	178.8028933	6849.708861	1173.65642	20.01446655	1.044435003	1.498451626	0.948246617	1.432379789
1873	33	10	7.494028494	19.12067492	3	178.9117117	6837.333333	1170.852252	19.94234234	1.282680489	1.427577592	1.237543902	1.409602171
1874	34	14	6.2160738	18.77017539	3	179.1121157	6827.696203	1157.81736	20.06148282	1.631803155	1.359715872	1.620393527	1.356016421
1875	17	15	7.402085303	17.47105019	5	179.755877	6750.927667	1153.316456	20.51356239	1.440842673	1.431211658	1.48278001	1.451486284
1876	23	16	8.169291117	15.49090679	5	182.1681736	6670.743219	1149.947559	21.27667269	1.198404038	1.455038238	1.294019251	1.554803367
1877	15	11	6.586501301	16.89949874	4	184.0072464	6599.788043	1169.065217	21.83876812	1.34756323	1.284391493	1.49890402	1.373966229
1878	20	12	5.73950441	15.0154637	3	185.3568841	6556.822464	1196.92029	22.2173913	1.622887574	1.420116648	1.770769465	1.401065004
1879	19	13	4.575930505	16.05800521	3	185.6666667	6487.834234	1206.378378	23.6972973	1.496485376	1.321686214	1.730156026	1.34586833
1880	13	9	3.035117323	15.72852516	3	186.5561594	6439.717391	1210.365942	26.12137681	1.392652325	1.182648174	1.669222569	1.246814716
1881	23	15	3.564754199	16.09365002	6	187.3381818	6461.712727	1227.414545	29.21454545	1.24008929	1.294736974	1.564083296	1.372459006
1882	22	14	3.70890886	17.02555846	6	187.5605787	6458.743219	1246.755877	32.25316456	0.98065269	1.259959288	1.371057945	1.374252534
1883	21	14	2.563920204	20.40797493	6	187.0688406	6432.108696	1263.889493	34.44384058	0.792801306	1.301846516	1.160974166	1.406749682
1884	14	8	3.727086949	9.936383786	7	186.9778761	6408.586283	1273.121681	35.75663717	0.645847181	1.515948008	0.880566666	1.730420553
1885	7	1	1.91784052	7.92387104	7	186.6980198	6429.262376	1275.881188	35.74752475	0.724308476	1.433985084	0.954975411	1.670037553
1893	37	15	7.923932147	23.14746999	3	168.2230216	7436.571942	1408.726619	21.3705036	1.360864878	0.998026091	1.133121222	1.008885719
1894	41	15	10.35589879	22.98022451	3	167.9141324	7441.008945	1431.742397	21.00178891	1.206315856	1.151748357	0.977858824	1.179951477
1895	31	13	10.74599697	22.90539976	3	168.9033989	7419.561717	1428.348837	20.19499106	1.006130269	1.088490784	0.791757062	1.155853987
1896	17	4	8.629760426	23.65146511	3	170.8870968	7374.571685	1415.137993	19.66308244	0.742632192	0.956809792	0.497033517	1.011234455
1897	37	14	12.0144258	19.56987474	3	168.8333333	7277.844086	1440.476703	18.27240143	0.753209805	1.455418766	0.452174474	1.440092199
1898	34	16	15.10593503	17.66554981	5	167.8702703	7206.079279	1468.097297	18.32252252	0.998971415	1.653786635	0.790217942	1.663185978
1899	37	14	18.11203176	15.46804983	3	167.8543165	7168.863309	1467.267986	19.2823741	0.655827391	1.677248216	0.380724993	1.639708288
1900	28	11	10.41809441	13.74658153	3	167.0628366	7132.342908	1445.588869	19.80789946	0.532165799	1.632912201	0.243880192	1.542961717
1901	29	15	13.81571146	12.93571418	7	167.4496403	7102.94964	1422.77518	19.97302158	0.43817735	1.491601819	0.072354241	1.42545709
1902	38	14	18.95603149	13.42992452	7	163.3508137	7046.698011	1456.692586	19.97287523	0.570556921	1.471236348	0.110223397	1.402314925
1903	36	17	16.51150705	16.47989993	3	161.2369838	7038.75763	1475.43447	19.98204668	0.804704142	1.41562413	0.48491965	1.376665346
1904	30	15	12.04726453	16.36775834	3	162.2928571	7069.942857	1467.076786	20.24107143	0.911258942	1.252229857	0.700612117	1.228517927
1905	30	14	11.72556096	17.19979914	3	163.4512635	7070.241877	1454.083032	20.94584838	0.906399674	1.242765994	0.63190994	1.14867267
1906	37	17	9.528030107	19.03372535	3	164.4468468	7066.185586	1433.538739	21.13873874	1.051592153	1.248254645	0.857108369	1.160169035
1907	24	11	8.349340948	18.30926636	3	166.6283662	7026.658887	1379.617594	21.05745063	1.032767883	1.211863852	0.867207337	1.185256451
1908	31	14	10.3618797	19.46748124	3	167.1717902	6953.529837	1353.318264	20.88607595	0.953780162	1.148419344	0.833326425	1.099113688
1909	29	11	11.85256417	19.17722524	3	166.6618962	6903.565295	1337.014311	20.08050089	0.881178205	1.117950275	0.739782381	1.01088919
1910	37	14	20.09158258	16.93115012	3	167.7450271	6887.262206	1313.585895	19.55153707	0.827162704	1.256469637	0.663468391	1.155414931
1911	36	12	12.7316548	20.51792555	3	170.2967626	6878.651079	1283.282374	19.64388489	0.959407961	1.480867887	0.839177832	1.376477763
1912	34	12	10.35864888	20.10400061	3	171.5863309	6873.660072	1250.848921	19.67805755	0.872612953	1.507833323	0.729065219	1.35930655
1913	32	17	11.0841901	18.04303272	3	173.920434	6883.16094	1212.549729	19.98372514	0.759206179	1.50492714	0.540026011	1.302038811
1914	29	8	16.68303672	16.71723121	5	176.9261261	6921.886486	1176.863063	20.13513514	0.795883101	1.528687865	0.600197282	1.340222731
1915	29	14	14.79144627	17.82450538	3	177.9130435	6914.576087	1166.766304	20.05797101	0.854995257	1.506339878	0.65369257	1.379574053
1916	35	17	15.84567514	16.95785912	3	178.3441441	6877.324324	1173.264865	19.82162162	0.747698765	1.258351727	0.510168187	1.196657413
1917	31	15	16.48362363	16.43115572	3	177.9009009	6864.428829	1168.913514	19.45945946	1.102307263	1.397115695	0.990642373	1.368395202
1918	36	14	8.243577938	19.43635667	3	176.7913669	6846.744604	1163.935252	19.42086331	1.358100861	1.506470925	1.299002424	1.498135149
1919	27	14	6.331338279	18.56870003	5	177.3985507	6792.992754	1161.148551	19.69746377	1.380887467	1.542719781	1.394036777	1.55571036
1920	16	15	7.513335124	17.0131408	5	179.3285199	6727.904332	1159.666065	20.25812274	1.32478332	1.53852529	1.423897856	1.602576089
1921	20	14	5.603834582	17.87914578	5	180.6557971	6669.628623	1174.585145	20.63224638	1.366022903	1.495847595	1.47661645	1.545340471
1922	20	11	5.086063025	17.02200507	5	181.5891892	6626.421622	1189.902703	21.18378378	1.445560998	1.49323805	1.5447556	1.477283731
1923	21	13	4.929467241	16.86670012	3	183.192029	6574.630435	1197.557971	22.60869565	1.588466806	1.490118313	1.732242459	1.445936608
1924	32	16	5.30636825	16.91538863	3	184.6552347	6555.211191	1210.33574	24.78158845	1.518401694	1.495568079	1.692875348	1.451136142
1925	18	12	3.677276223	15.60586463	6	185.6841155	6543.292419	1225.658845	27.58483755	1.358570665	1.408625805	1.610255942	1.387218669
1926	30	16	2.763219725	18.37367505	4	185.4257246	6504.190217	1247.436594	30.125	1.161300492	1.2953152	1.475452676	1.310831249
1927	24	14	3.292014656	16.42780008	4	184.6003617	6472.669078	1271.20434	31.97830018	1.071520065	1.166784892	1.434394985	1.148020828
1928	11	5	3.461000291	11.31308676	7	185.2335907	6506.032819	1273.750965	33.73359073	0.420645864	1.226833435	0.821713906	1.401693326
1929	11	4	2.271268174	8.34115798	7	185.5232558	6512.223256	1272.906977	34.46744186	0.662648699	1.325004544	0.990736377	1.563481641
1937	33	11	10.04809296	22.79047007	3	165.8767857	7486.007143	1437.9625	21.0125	1.225296967	1.119431779	1.034936927	1.171554849
1938	29	14	9.020667643	22.8346495	3	165.3405405	7485.563964	1465.488288	20.81441441	1.169090104	1.201900184	0.969217589	1.227034539
1939	47	18	12.52509537	22.70317494	3	165.5935252	7464.375899	1461.688849	20.01438849	1.096821643	1.260505326	0.9034563	1.292413935
1940	45	21	14.66120036	19.79973329	3	166.2956989	7427.163082	1452.130824	19.50179211	1.000347633	1.456552744	0.776720118	1.448365495
1941	36	16	25.00920917	13.41439389	1	164.8139535	7364.237925	1464.325581	18.62254025	0.903541479	1.753655493	0.628310133	1.705838613
1942	23	14	18.65111496	12.51075017	7	165.118068	7306.105546	1471.633274	18.11985689	0.728148404	1.740758693	0.468665783	1.749880171
1943	34	12	16.96053778	16.40265146	3	166.5197133	7280.688172	1455.605735	18.17741935	0.522823377	1.650991127	0.208685635	1.627313152
1944	39	16	18.85479707	14.74949614	3	165.9946237	7241.890681	1438.424731	18.52508961	0.540602693	1.633902758	0.231915788	1.585666589
1945	35	11	9.538909606	17.43635398	3	167.155914	7179.412186	1423.24552	19.62903226	0.323526021	1.532415889	-0.062425254	1.472111993
1946	25	8	14.05493486	18.41409668	3	164.8276481	7123.682226	1431.807899	19.95691203	0.378969697	1.5414289	-0.068913682	1.447546065
1947	28	14	30.27982478	13.05062483	5	157.9390681	7117.456989	1473.240143	19.609319	0.743788039	1.587942474	0.47773461	1.567842305
1948	33	17	18.21411672	18.11557472	3	156.7284173	7118.102518	1482.170863	19.90107914	1.151554566	1.510349572	0.990109764	1.508808464
1949	31	16	17.21033032	10.11550384	5	159.1234347	7135.232558	1460.905188	20.23613596	0.905116415	1.375238472	0.684978327	1.357030821
1950	27	15	16.50203288	15.01082516	3	159.9874101	7134.591727	1440.026978	20.36690647	0.984361757	1.35561794	0.809362706	1.370401077
1951	30	16	10.65778578	18.54348054	3	163.0017953	7086.958707	1390.7307	20.3572711	1.066363685	1.291667901	0.931221981	1.299215093
1952	36	16	10.71781963	20.24249331	3	164.9694245	6989.366906	1355.158273	20.07014388	1.02504896	1.236313924	0.881817058	1.186472379
1953	25	17	10.24840426	20.26250028	3	164.5053763	6926.892473	1335.709677	19.28494624	0.935116524	1.189432269	0.771795219	1.083651748
1954	36	14	7.70462537	20.23216127	3	166.3453237	6935.514388	1304.573741	18.94784173	0.863385648	1.328187466	0.666467644	1.193580762
1955	31	13	11.4230356	20.38492549	3	166.2926391	6936.513465	1293.883303	18.77737882	0.936904591	1.547835186	0.699552946	1.411440432
1956	24	15	10.48627763	20.60397559	3	167.4288288	6934.468468	1270.272072	19.02522523	0.862253758	1.562274033	0.606329611	1.361917055
1957	26	14	11.90740919	17.83380496	3	170.7769784	6941.109712	1234.381295	19.60611511	0.8177981	1.468564779	0.532861101	1.191741653
1958	35	17	11.84566094	17.35749974	3	174.2805755	6955.696043	1202.769784	19.42985612	0.902346853	1.472097501	0.666027784	1.25350634
1959	28	12	14.10525138	18.81564998	3	174.535009	6950.490126	1194.003591	18.98025135	1.00567795	1.508932404	0.790252425	1.394040942
1960	32	17	15.05162286	15.71144337	5	175.9205776	6928.691336	1177.481949	18.92779783	1.055777329	1.419490296	0.890821406	1.421896368
1961	40	13	11.56305162	19.4328379	4	175.9711191	6907.711191	1164.920578	18.99819495	1.170703579	1.475346275	1.056894686	1.457979798
1962	29	13	9.163364585	19.02188424	3	173.3105925	6874.014363	1175.125673	18.96588869	1.362285271	1.618571267	1.279858872	1.554839402
1963	31	8	4.990308835	19.10612501	5	174.9349005	6835.19349	1167.658228	18.91500904	1.382937603	1.55524838	1.372749165	1.554153644
1964	26	13	5.345336033	18.79992511	5	177.4846847	6804.538739	1160.812613	19.1027027	1.45048036	1.565125489	1.483935487	1.594473958
1965	21	11	2.929622622	18.737168	5	178.1492806	6761.115108	1166.818345	19.57014388	1.46138192	1.600535467	1.469494119	1.579097532
1966	36	12	3.573015742	18.33277494	5	178.7513514	6703.763964	1168.708108	20.03423423	1.356841594	1.445928112	1.421305135	1.403999493
1967	29	18	5.713170965	17.62160418	3	179.5587703	6662.699819	1190.517179	21.46473779	1.41068747	1.589029598	1.553203744	1.551998353
1968	29	17	6.271888066	17.69223632	5	182.2720721	6644.371171	1202.571171	23.76216216	1.424415991	1.653595172	1.626727968	1.591586642
1969	38	14	2.76312388	17.86862505	6	183.8216216	6608.302703	1219.322523	26.32972973	1.27635619	1.369177736	1.546222247	1.383149587
1970	18	13	2.746395056	15.67022506	4	183.1155235	6545.669675	1247.767148	28.49097473	1.094300032	1.115880702	1.407825604	1.214465491
1971	34	13	4.767471067	15.90236778	4	182.0126582	6510.280289	1271.126582	29.96564195	1.073170602	1.340735489	1.416164988	1.324303329
1972	27	11	2.452062354	18.4971139	6	182.7016275	6536.285714	1278.028933	31.41772152	0.809058826	1.325449832	1.179091703	1.380894713
1973	13	6	2.490197159	15.196033	7	183.7779783	6570.911552	1273.31769	32.42599278	0.695387181	1.354121462	1.077957217	1.52190195
1974	22	6	2.192946962	16.44088322	6	184.6231884	6575.302277	1263.898551	33.17805383	0.73201875	1.398627226	1.090462786	1.617846544
1975	7	1	1.895047759	15.66904762	6	186.1558442	6530.019481	1254.084416	33.65584416	0.734168728	1.391896188	1.012877802	1.621657948
1981	37	12	9.6997544	22.09814678	3	163.9230769	7534.248658	1453.348837	20.87477639	1.238893293	1.205471054	1.076030934	1.286297244
1982	34	16	10.94668477	22.10417481	3	161.8517857	7518.626786	1489.067857	20.24642857	1.149957103	1.169267762	0.981627121	1.173617804
1983	33	15	13.01076463	21.76192507	3	162.1942959	7493.456328	1488.074866	20.05347594	1.211435005	1.339672357	1.083648044	1.33783412
1984	32	16	14.9039501	11.88477507	7	161.9014337	7465.270609	1483.177419	19.39426523	1.140605994	1.590288855	0.972173667	1.601701671
1985	33	15	25.11277681	9.163645865	7	162.5547576	7427.111311	1474.206463	19.005386	1.035529569	1.802471645	0.779185134	1.761751324
1986	39	14	20.26427459	11.98065524	7	164.2692998	7391.412926	1458.102334	18.66247756	0.76587413	1.749522424	0.514418195	1.755633984
1987	38	6	17.59135953	15.65027962	3	164.4973166	7388.765653	1435.275492	17.37030411	0.472274915	1.597809397	0.125805092	1.647899657
1988	33	10	25.1924706	15.53997333	3	163.8978495	7350.528674	1426.365591	17.72580645	0.434691374	1.555882141	0.048624299	1.611796588
1989	37	14	19.41805826	16.33999987	3	164.6344086	7279.827957	1422.716846	19.11111111	0.227315815	1.59813302	-0.107797528	1.64661532
1990	26	12	13.34022765	20.26526773	3	164.0448029	7236.478495	1412.198925	19.90143369	0.129658415	1.471523899	-0.151025515	1.443573923
1991	33	12	18.45790143	15.91265146	3	160.2232143	7227.589286	1421.517857	19.82142857	0.454347845	1.486465454	0.209392829	1.462201494
1992	32	14	28.90538679	15.96474971	3	153.5125448	7203.629032	1477.614695	19.38351254	0.869762916	1.555930205	0.616761387	1.566868281
1993	29	11	15.98154555	11.69613557	1	156.0664273	7197.023339	1456.97307	19.8545781	0.806646407	1.421809101	0.602841455	1.457172065
1994	27	15	16.51167606	12.65521308	3	155.6666667	7157.552585	1452.137255	19.34937611	0.958503745	1.399333052	0.816471103	1.451403362
1995	30	11	14.17147513	15.70901541	3	158.6456835	7102.535971	1405.255396	19.20503597	1.063499168	1.35342405	0.931842229	1.425497514
1996	29	15	11.1005051	19.5083959	3	161.8781362	7039.944444	1350.874552	18.89426523	1.185086049	1.422862701	1.051212761	1.409953666
1997	27	14	9.662057459	18.78015024	3	161.7899461	7007.064632	1327.497307	18.35547576	1.196789193	1.477880698	1.116669769	1.409582424
1998	26	10	7.671438168	20.14904069	3	163.811828	7022.03405	1298.195341	18.10215054	0.989226855	1.498755544	0.850817057	1.44645744
1999	34	13	8.565612788	19.98972347	3	163.6630631	7024.834234	1289.572973	17.92612613	0.909686282	1.713176616	0.623573875	1.643359405
2000	29	12	10.57018479	19.27942117	3	165.7710197	7010.028623	1263.661896	18.36314848	0.952301863	1.640395939	0.704054577	1.48626452
2001	32	17	11.74162297	17.24228091	3	169.7544803	7003.810036	1233.132616	18.82795699	0.766830467	1.555663846	0.546037903	1.331965911
2002	29	15	12.50012774	20.0064501	3	172.2288288	7006.940541	1217.181982	18.5045045	0.679247234	1.583087087	0.492082267	1.356205058
2003	31	16	10.98044659	20.96583295	3	173.2311828	7005.335125	1193.478495	18.16666667	1.044097748	1.552050449	0.857154068	1.456541848
2004	23	10	12.82225015	18.02407822	3	173.1127013	6992.143113	1178.867621	18.05187835	1.185718405	1.499683249	1.035078511	1.528526039
2005	35	18	18.41126027	15.98750008	3	171.5722022	6951.68231	1182.732852	18.24368231	1.164713018	1.546557777	0.999760738	1.538083631
2006	21	14	10.89674453	16.81953721	3	171.1472172	6914.754039	1180.278276	18.16337522	1.293973781	1.562980294	1.180160475	1.524860901
2007	24	14	9.735884256	18.63827076	3	172.962298	6883.91921	1170.978456	17.95332136	1.307590283	1.530197278	1.251187336	1.52447449
2008	23	15	6.681540361	19.29641618	3	174.9532374	6867.138489	1163.571942	17.80755396	1.346601766	1.565834546	1.409695759	1.648473229
2009	27	13	3.427141073	17.90187512	5	174.4082734	6848.53777	1163.705036	18.27338129	1.374841034	1.679178499	1.430335248	1.739184731
2010	31	14	4.371240044	17.29015013	5	174.618018	6805.369369	1165.338739	18.95315315	1.324817613	1.704926819	1.417998052	1.79352684
2011	18	14	5.705890851	16.33305018	3	177.1765766	6756.497297	1178.326126	20.66126126	1.37073136	1.604460567	1.544501266	1.672640405
2012	34	12	4.086003638	17.61253147	3	180.1441441	6717.445045	1192.16036	22.76576577	1.387531117	1.593697682	1.64024983	1.603202909
2013	20	12	3.678371997	15.907293	4	180.9783394	6657.629964	1217.629964	25.02527076	1.175248638	1.330415063	1.496962351	1.358883232
2014	15	13	2.647615018	15.18164139	4	181.4946043	6601.884892	1238.521583	27.20683453	0.996308219	0.890197493	1.314356947	1.166737214
2015	33	19	2.620839178	15.96627489	4	180.7124774	6562.755877	1262.585895	28.27667269	0.900439185	1.202975881	1.230531712	1.300386376
2016	28	13	2.114029229	16.79029995	4	180.8868941	6561.193896	1280.409336	29.15260323	0.605585525	1.086695548	0.941352159	1.186644721
2017	25	16	2.221774931	21.51738686	6	182.2929476	6593.175407	1277.524412	30.39240506	0.720719241	1.365718506	1.100357431	1.557495713
2018	29	14	1.884217027	16.78565539	2	183.7715827	6591.919065	1265.897482	31.93165468	0.735238928	1.499272145	1.096528828	1.72510438
2019	16	6	1.739032946	16.240672	2	186.1541284	6542.862385	1244.658716	33.3706422	0.720238695	1.38845365	0.992277355	1.627474589
2025	30	15	10.79394537	22.04948153	3	160.6957295	7565.743772	1471.88968	20.1316726	1.40487276	1.478000462	1.265707418	1.591848239
2026	28	15	13.31859385	21.31372493	3	158.4252669	7536.142349	1500.679715	19.98754448	1.323708314	1.375740689	1.222068477	1.500399554
2027	40	14	14.54428671	18.52085018	3	158.2075134	7509.683363	1504.991055	19.80858676	1.303912304	1.384482838	1.207018495	1.491456658
2028	33	12	23.02569653	5.76325004	7	158.0446429	7497.783929	1499.301786	19.08214286	1.20492553	1.58677128	1.095772117	1.664178222
2029	41	15	20.79914475	8.346959593	7	160.3660714	7477.5875	1471.321429	19.24285714	0.985223629	1.665702045	0.809576161	1.707207479
2030	36	12	19.45980509	9.868447863	7	162.5035587	7451.927046	1446.3879	19.27224199	0.781527412	1.69558596	0.602078289	1.703852499
2031	35	13	19.1632981	12.3286619	7	163.3875	7432.333929	1417.764286	18.50178571	0.434842026	1.568603262	0.133586058	1.63657105
2032	35	11	20.7449448	14.51043821	3	160.9055258	7408.889483	1425.661319	18.23885918	0.330860243	1.545824587	-0.007686105	1.659339897
2033	40	15	22.89256653	16.84822492	3	160.4516129	7371.820789	1430.173835	18.98566308	0.428706555	1.700202756	0.132018324	1.789357312
2034	23	9	11.08406215	17.22668569	3	162.7196429	7351.985714	1397.326786	19.86785714	0.401537694	1.583596516	0.188972278	1.682726723
2035	24	9	11.46903802	17.76989958	3	161.1310592	7350.910233	1389.852783	19.90125673	0.439129716	1.438036159	0.20939519	1.536639169
2036	36	10	23.18617946	15.01847487	7	156.797153	7327.122776	1420.293594	19.60142349	0.529510723	1.35589201	0.311797626	1.468885295
2037	33	14	18.08551433	16.3988001	3	153.8837209	7268.527728	1450.629696	19.25223614	0.618954201	1.412871021	0.466213867	1.538690233
2038	25	9	16.90017932	17.3949749	3	153.6899642	7197.274194	1447.084229	18.78136201	0.893435046	1.385248296	0.805271752	1.517148435
2039	22	13	13.89065511	18.47326584	3	155.201426	7120.959002	1411.850267	18.09625668	0.919053182	1.402673565	0.702602576	1.599846847
2040	26	15	13.46767404	19.19792885	3	158.4496403	7095.82554	1354.57554	17.98201439	1.195373133	1.455048479	1.117233239	1.561950006
2041	30	14	10.22770163	18.92506338	3	159.775	7107.192857	1319.5125	17.78928571	1.365957886	1.498317736	1.379303282	1.516803485
2042	26	9	9.933116849	20.43138254	3	161.6625	7140.028571	1293.328571	17.32321429	1.16261597	1.484375387	1.26293017	1.538089454
2043	21	8	9.7141764	20.18723403	3	162.5537634	7125.691756	1278.094982	17.13620072	1.084435597	1.581264891	1.070863094	1.602532871
2044	31	14	9.983727466	19.77662556	3	164.2325581	7085.338104	1259.744186	17.37030411	0.989995745	1.559612167	0.886488804	1.494420445
2045	25	12	11.68895981	18.5369873	3	167.6445242	7061.405745	1233.599641	17.74147217	0.725756269	1.649631344	0.651818855	1.494059868
2046	36	15	10.76194944	19.88614074	3	170.3255814	7061.109123	1217.166369	17.75670841	0.631937876	1.717814319	0.58214009	1.530556992
2047	29	12	11.62544916	20.09581436	3	170.7953321	7058.360862	1200.007181	17.93716338	1.00070814	1.681657396	0.818402778	1.620901272
2048	32	16	11.86595698	19.73988759	3	170.3830935	7045.194245	1189.483813	18.00539568	1.147873741	1.573209554	0.964713457	1.526186663
2049	35	15	11.80987798	19.44563892	3	168.9964222	6999.490161	1191.763864	18.02146691	1.120557226	1.60344889	0.940969672	1.549638174
2050	25	16	13.07521594	16.88969703	3	169.1756272	6949.379928	1190.487455	17.62544803	1.225052878	1.578676239	1.028432708	1.533098869
2051	20	13	11.74011099	14.80680005	3	169.609319	6932.503584	1190.12724	16.97670251	1.225808874	1.495029844	1.084415253	1.482530683
2052	21	10	7.295383352	16.56015082	3	170.7773788	6945.59605	1179.244165	16.71274686	1.299072826	1.587673956	1.279454315	1.639757788
2053	31	10	7.820205441	18.17315013	3	171.6050269	6952.463196	1163.834829	17.2064632	1.295210384	1.755391285	1.383030236	1.836014301
2054	26	12	9.881635809	16.47787508	3	172.7450628	6927.071813	1158.448833	18.33393178	1.294403113	1.816300079	1.41302371	1.900557168
2055	30	13	9.555735394	14.44999991	1	175.5125899	6872.05036	1171.651079	19.88848921	1.298992914	1.673778319	1.464787179	1.784411931
2056	31	14	9.545711908	14.90529995	1	177.0843806	6794.716338	1194.617594	21.69658887	1.242289372	1.527475886	1.457970992	1.60550715
2057	26	11	3.944008501	15.86732484	3	178.4172662	6720.832734	1214.697842	23.57913669	1.085999779	1.402446255	1.39344763	1.49094183
2058	23	15	1.993772321	15.68587503	3	179.8039568	6654.584532	1227.98741	25.45503597	1.07536833	1.370359048	1.372854531	1.554876745
2059	26	16	1.714863486	16.49049984	4	180.0125899	6619.798561	1246.442446	26.53057554	0.909360436	1.32735275	1.25674932	1.558586138
2060	20	14	2.269705351	15.79922485	4	180.0234657	6612.276173	1268.900722	27.37906137	0.751875713	1.317893766	1.174854167	1.563997537
2061	31	16	1.861648838	18.60619989	4	180.9873646	6623.409747	1277.622744	28.57400722	0.757334325	1.562269233	1.17598144	1.775097728
2062	35	12	2.185432037	20.44349247	6	182.227027	6629.837838	1272.322523	30.45405405	0.787347287	1.763563879	1.142537408	1.954813577
2063	20	6	2.340374059	14.5404521	6	184.5479204	6593.531646	1244.835443	32.47197107	0.611118125	1.620995144	1.013765236	1.872858134
2064	17	6	2.785238531	15.41821756	2	184.9151874	6515.372781	1257.698225	31.48126233	0.758661453	1.534184507	0.999653184	1.771630534
2069	29	10	10.74937302	22.03037482	3	158.0769231	7579.627907	1478.370304	19.68872987	1.464484984	1.551186657	1.401139781	1.655173793
2070	33	17	14.62516852	20.5579	3	154.6232143	7560.428571	1504.308929	19.15357143	1.422135868	1.617330599	1.365106052	1.719118774
2071	28	15	14.51016659	15.92887503	7	154.7326203	7546.117647	1505.254902	19.03386809	1.404427993	1.630219769	1.325961441	1.713325597
2072	39	15	14.55495508	9.867349821	7	155.9396092	7541.793961	1496.516874	18.94138544	1.365299714	1.641097051	1.279344343	1.717065923
2073	30	14	8.958841415	11.32581433	7	157.5607143	7520.035714	1469.566071	19.0625	1.281232587	1.670143759	1.192348476	1.78836897
2074	36	14	18.22991856	9.261704187	1	159.4571429	7495.785714	1446.046429	19.1125	0.964803402	1.71848959	0.823977029	1.77981174
2075	34	12	20.26937247	11.40805006	7	160.4652406	7474.916221	1425.839572	18.81105169	0.578799638	1.651175457	0.342669819	1.736178391
2076	30	12	21.65873792	10.75206023	7	159.1017857	7459.016071	1426.8125	18.87321429	0.466170715	1.720875239	0.16032183	1.777655885
2077	33	17	23.66347172	15.10949603	3	156.9396092	7443.850799	1439.815275	19.08703375	0.489936455	1.834210944	0.19374157	1.898332193
2078	46	14	20.32884781	16.9003052	3	159.7104796	7447.676732	1403.206039	19.84191829	0.519885756	1.67241991	0.276629168	1.746343338
2079	30	10	12.73540609	12.20010601	7	160.0607143	7445.530357	1386.448214	19.97321429	0.617078429	1.534810567	0.412400352	1.614334792
2080	35	14	20.53475321	13.38320804	7	155.6362007	7405.804659	1416.396057	19.21505376	0.787310217	1.497024226	0.705891678	1.575325124
2081	30	13	23.88947068	14.11792501	7	151.5630551	7325.138544	1452.829485	18.90586146	0.804121659	1.484610372	0.802444315	1.645334226
2082	25	14	17.61549104	13.38795024	7	152.4803571	7245.257143	1439.371429	18.29464286	1.055038881	1.380052537	1.043390356	1.497693665
2083	28	13	14.0020833	18.16704956	3	152.09839	7174.318426	1421.304114	17.54919499	1.036867175	1.403836405	1.050945573	1.584711902
2084	25	10	15.20975584	18.45974829	3	154.3642857	7185.628571	1377.342857	17.18035714	1.273836112	1.371816635	1.334911317	1.516905002
2085	39	16	13.8732094	18.26780327	3	158.5107143	7237.942857	1321.8	17.3625	1.334123783	1.342374811	1.484010792	1.490311915
2086	26	7	11.59977619	18.74962325	3	160.1594982	7273.295699	1291.555556	16.92831541	1.252896619	1.17936843	1.610905044	1.351312004
2087	26	8	11.48986584	19.04305436	3	161.3868093	7220.192513	1274.893048	16.61853832	1.140889138	1.379110044	1.291833736	1.466713302
2088	21	8	12.03459041	19.25226598	3	162.3953488	7144.613596	1262.610018	16.65831843	1.035472546	1.427149553	0.999419656	1.425277853
2089	28	9	11.59668618	19.64744272	3	164.1788909	7106.134168	1243.561717	16.69946333	0.930089384	1.479105914	0.835923295	1.438222945
2090	27	11	10.11057792	20.23627479	3	166.6779964	7110.368515	1228.270125	16.77101968	0.942600542	1.602913475	0.854878537	1.565872893
2091	28	16	10.69678516	20.38038336	3	168.1571429	7115.367857	1208.910714	17.15	1.058921525	1.668240845	0.920926459	1.583363317
2092	33	12	10.30233768	20.68138423	3	167.5348837	7098.194991	1203.892665	17.84973166	1.237522602	1.609544206	0.990397146	1.485786712
2093	32	16	11.39644397	19.87834991	3	166.1449016	7043.982111	1209.949911	17.53846154	1.220260024	1.610963213	0.997399196	1.509957112
2094	31	18	10.70846875	20.80842501	3	166.3034111	6994.885099	1209.694794	16.56912029	1.185553026	1.664560622	0.947942384	1.585601166
2095	30	13	11.51457833	18.72192496	3	166.8050089	6992.695886	1205.19678	15.92665474	1.241214806	1.654180598	1.090805952	1.641261123
2096	29	13	15.62620374	16.14666671	3	167.5116279	7037.216458	1194.202147	15.84257603	1.288044014	1.629729843	1.284424365	1.707989746
2097	30	14	19.01355539	13.66205072	1	169.1917563	7056.111111	1173.799283	16.51792115	1.181755686	1.735419655	1.306801334	1.872182846
2098	32	13	11.285449	18.8579434	5	172.6702703	7047.209009	1152.861261	18.10810811	1.140146112	1.795437402	1.338133417	1.92613811
2099	28	14	12.60722222	13.95244949	5	172.9263914	6975.655296	1187.149013	19.14003591	1.212408738	1.661763062	1.40335927	1.806553257
2100	25	15	7.839274993	12.66516708	1	174.718638	6886.668459	1200.555556	20.63082437	1.082098833	1.544392794	1.322293013	1.693097033
2101	19	14	4.584024885	15.43449998	1	176.6021505	6785.446237	1208.655914	22.26702509	1.078557175	1.51394279	1.323854141	1.663440146
2102	27	14	1.886499355	16.68560012	3	178.4416517	6723.184919	1216.481149	23.90305206	1.117338818	1.545479798	1.310734175	1.687749825
2103	24	14	1.294949345	16.31002512	4	179.0805009	6688.527728	1225.676208	25.00536673	0.946933692	1.500393658	1.262472904	1.709292394
2104	33	15	1.232161178	17.93645011	4	179.363964	6668.502703	1243.821622	26.01081081	0.952400747	1.557111484	1.335063532	1.760447212
2105	30	13	2.320261469	15.79882511	4	179.4605735	6665.120072	1263.625448	27.02867384	0.951141095	1.730106091	1.369826011	1.896527506
2106	29	13	1.822282478	19.57355025	6	179.7324955	6679.441652	1269.21544	28.59605027	0.861024809	1.818279541	1.217923589	1.965293974
2107	26	13	2.11276177	16.36481915	6	180.8586762	6656.565295	1260.386404	29.97495528	0.72109668	1.677254639	1.036868975	1.908241922
2108	44	20	1.763182724	15.91718281	6	181.5	6581.368231	1272.689531	29.7400722	0.609280282	1.670857	0.891931269	1.874845214
2109	18	8	1.3937255	17.71431707	2	180.997389	6502.778068	1299.527415	29.25326371	0.500863582	1.555373158	0.717987234	1.750972847
2113	29	12	11.40484272	21.32799981	3	155.5159574	7593.569149	1484.058511	19.39893617	1.578362502	1.533872865	1.570212655	1.62757989
2114	30	12	16.89451986	19.17747514	3	152.2255773	7598.207815	1503.143872	19	1.556365836	1.589263219	1.553785861	1.693069953
2115	32	14	14.19129101	14.59449989	7	152.1256637	7601.637168	1509.8	18.92743363	1.560390331	1.689192824	1.517852865	1.755753703
2116	30	17	15.32799094	10.22654993	1	153.4483986	7598.364769	1501.348754	18.29359431	1.580952734	1.703709297	1.558848225	1.795964152
2117	31	11	18.89244991	11.64681433	1	154.6070796	7570.141593	1479.513274	18.24955752	1.534984417	1.763429232	1.485810079	1.874184981
2118	33	15	19.10847973	7.384520033	7	155.6985816	7532.593972	1459.539007	18.20212766	1.244726151	1.751124656	1.122049874	1.830243415
2119	32	14	19.34521371	9.097368366	7	157.0053476	7504.83779	1438.524064	18.34402852	1.026695285	1.77016563	0.861576077	1.848021112
2120	27	11	20.73573968	10.88699994	5	156.8007117	7504.016014	1433.24911	18.79359431	0.770151474	1.79381419	0.52487488	1.829128794
2121	33	10	24.19705609	12.46364995	5	153.7950089	7499.15508	1448.055258	18.99108734	0.681355599	1.69146312	0.414575001	1.686264381
2122	26	11	19.51342503	16.37588844	3	156.6583184	7516.465116	1413.280859	19.72271914	0.724745101	1.559593165	0.50772585	1.607999808
2123	31	8	13.98735869	15.63938027	3	158.1968085	7524.744681	1398.024823	20.12056738	0.839983381	1.526026748	0.609741336	1.613735273
2124	36	13	18.04265022	13.72954989	7	155.6149733	7464.691622	1418.338681	19.45989305	1.012615047	1.562205374	0.843840957	1.636357144
2125	35	13	24.31353751	16.3050498	3	152.7996422	7384.071556	1435.563506	18.74239714	1.235625553	1.529968125	1.153334501	1.618091989
2126	28	17	18.05526332	13.03423568	7	151.930605	7301.053381	1428.297153	18.01779359	1.259636074	1.388138793	1.222169317	1.44883623
2127	30	12	18.22591315	13.37819536	7	151.0303571	7261.869643	1415.291071	17.33928571	1.312502235	1.278136402	1.31115979	1.357757404
2128	33	13	14.25820054	16.23192089	3	152.771836	7285.105169	1378.516934	17.06595365	1.359916098	1.246186949	1.426156066	1.362935267
2129	20	6	12.26363227	18.78948972	3	155.7214286	7353.860714	1337.616071	17.03392857	1.429337406	1.224559718	1.55490244	1.342765599
2130	22	5	13.11686241	16.83692305	3	157.7615658	7358.925267	1315.747331	16.69572954	1.2620584	1.092762798	1.423357472	1.235834844
2131	22	6	12.65115355	19.38269577	3	156.9516995	7259.728086	1315.847943	16	1.285615087	1.172704078	1.450199574	1.322240606
2132	24	9	13.40894788	17.50261895	3	158.8413547	7176.778966	1295.606061	15.96613191	1.157761014	1.316586059	1.199467164	1.40353539
2133	36	11	11.55378293	17.91138881	3	161.0249554	7139.445633	1270.941176	15.78253119	1.112176783	1.438741311	1.077575885	1.477734648
2134	31	13	9.924977786	19.71025057	3	163.5571429	7148.948214	1246.875	15.875	1.115669727	1.538136505	1.070968419	1.562960632
2135	35	14	12.60044889	20.52841432	3	166.311828	7174.249104	1216.743728	16.34408602	1.138934098	1.508703612	1.065337695	1.464088969
2136	27	14	10.13291362	20.33861807	3	164.9660107	7143.332737	1219.284436	16.6332737	1.289886612	1.541515684	1.11814391	1.450723189
2137	37	17	10.37475092	19.49719982	3	165.0375	7103.708929	1210.2375	16.63035714	1.190042116	1.467884466	1.035507947	1.399670556
2138	34	15	10.83154688	20.6435251	3	165.6642857	7065.719643	1201.378571	15.99821429	1.143349923	1.397613741	1.050238609	1.366821781
2139	21	14	11.09471449	21.90376794	3	165.7482143	7083.708929	1199.1875	15.30357143	1.230887249	1.605146788	1.159927063	1.632477127
2140	29	15	13.61330262	20.77010216	3	166.1687612	7133.475763	1195.418312	15.21005386	1.318255889	1.621390182	1.33337357	1.707585055
2141	28	8	16.67144736	17.39890081	3	168.1857143	7155.175	1179.6625	16.12321429	1.230713621	1.599396221	1.315228723	1.754961319
2142	25	11	23.30651886	12.61974244	5	169.3386809	7137.659537	1189.301248	17.23885918	1.191793874	1.658948772	1.327521816	1.826385505
2143	21	7	16.0360786	12.9682002	1	170.0861759	7084.132855	1215.40754	18.45062837	1.129329801	1.671849823	1.342338037	1.898843706
2144	33	17	9.521413579	13.07832508	1	172.7227191	6965.400716	1210.677996	19.92128801	1.029091444	1.582629718	1.277045317	1.767340057
2145	19	13	4.808500652	17.18203013	3	175.2816399	6875.151515	1205.286988	21.46345811	1.096977137	1.559118412	1.328915536	1.751776263
2146	21	10	3.468197506	17.06957524	5	177.1059246	6811.590664	1209.082585	22.62298025	1.201276831	1.475304112	1.411213614	1.733725913
2147	23	14	1.237331958	17.36691759	4	178.3727599	6771.24552	1208.422939	23.78494624	1.175478292	1.432400578	1.448620391	1.724116594
2148	27	13	1.086829636	18.10765046	4	178.5609319	6735.125448	1217.530466	24.85125448	1.036482837	1.586823411	1.424379729	1.851655416
2149	34	15	1.669776343	18.7396756	5	177.9677996	6724.545617	1236.749553	25.64758497	0.914606467	1.663532935	1.357002653	1.941441253
2150	25	10	1.65530024	19.09605006	6	177.0502693	6750.249551	1251.847397	26.91382406	0.904029347	1.739324301	1.232419081	1.968237199
2151	23	12	1.410302495	17.98186676	6	177.390991	6732.756757	1263.477477	27.83783784	0.804471928	1.755744052	1.093037659	2.020303524
2152	26	16	0.979187546	19.67776928	6	178.4625	6654.551786	1277.566071	28.1	0.62155059	1.858666413	0.934541784	2.069542825
2153	30	16	1.335022668	17.30587502	6	178.9387387	6558.057658	1304.336937	28.07927928	0.614646079	1.795384809	0.909960169	1.970020145
2154	20	7	1.484575758	11.31286621	7	178.8794926	6487.928118	1329.54334	28.13953488	0.852011883	1.719770956	1.076695276	1.857645699
2157	25	11	12.39570048	19.79999999	5	154.5992908	7616.62234	1474.10461	19.88475177	1.757026911	1.563627839	1.755183876	1.576372218
2158	35	13	14.26294957	12.76069998	3	150.2606383	7623.423759	1498.890071	19.31737589	1.702468723	1.63548606	1.698162169	1.687661428
2159	28	14	12.09596794	13.62172587	7	150.0746004	7648.007105	1508.788632	18.77797513	1.592376485	1.718121201	1.591564131	1.754387623
2160	35	16	15.18378332	9.662549937	1	152.1014235	7654.784698	1499.201068	18.00711744	1.607400313	1.721604295	1.604633647	1.805979109
2161	28	12	18.11874088	10.78384996	5	153.2021277	7621.62766	1479.132979	17.99113475	1.535597026	1.738456406	1.507577002	1.832807422
2162	37	12	16.08023566	8.339099918	7	151.6725979	7579.298932	1477.060498	17.4519573	1.360454357	1.754090142	1.243156643	1.845938668
2163	24	9	11.51149875	13.07434334	7	152.6702128	7540.531915	1459.239362	17.62765957	1.26303672	1.763512656	1.129889721	1.839819193
2164	24	8	12.17093549	12.85609008	7	153.8865248	7547.285461	1441.565603	18.38120567	1.072885707	1.741797216	0.92003212	1.777339137
2165	25	9	14.53667583	15.70283186	5	154.2920354	7553.120354	1425.20531	18.99115044	0.862951659	1.611133575	0.682570305	1.6469455
2166	34	13	15.54250784	15.24737493	5	151.9591474	7548.133215	1431.213144	19.15808171	0.848710895	1.559205002	0.663139474	1.584671011
2167	32	10	24.59825906	15.85741214	3	153.6992883	7546.688612	1422.877224	19.82740214	1.022547364	1.558187053	0.824406549	1.55650261
2168	29	10	9.474436582	18.40859456	7	156.1046099	7519.771277	1418.900709	19.84929078	1.12586318	1.636007503	0.984722969	1.680210859
2169	32	12	13.86054536	16.38613494	7	154.8351064	7448.41844	1410.14539	18.91666667	1.370425892	1.527731782	1.276948953	1.554459457
2170	26	12	16.9416587	17.93287896	3	153.8718861	7367.784698	1396.053381	18.17437722	1.419379011	1.371163607	1.404815489	1.434017771
2171	33	12	12.351927	16.69307297	3	154.0407801	7342.852837	1360.090426	17.98404255	1.390077464	1.039465144	1.340036041	0.94448961
2172	36	9	19.8605829	14.82751891	3	153.2566845	7374.71836	1347.456328	17.36720143	1.462032437	1.087081503	1.488529646	1.042208239
2173	20	4	13.74585057	17.86986874	3	153.0088496	7418.679646	1348.945133	16.90442478	1.476096469	1.202931803	1.574390454	1.289435377
2174	16	5	14.50684584	17.35053717	3	152.8092692	7372.187166	1355.907308	16.18538324	1.371820964	1.03070607	1.547118855	1.183047545
2175	15	3	12.1654593	18.80016462	3	153.1797153	7253.97153	1365.33452	16	1.365733981	1.01412487	1.536162668	1.171444052
2176	18	6	11.96818697	18.19861778	3	154.9040853	7184.833037	1349.058615	15.42451155	1.229508072	1.226016194	1.346892514	1.329754944
2177	31	12	12.10632113	19.30280697	3	158.0569395	7155.085409	1308.355872	15.00533808	1.165181339	1.347457267	1.221675336	1.358288044
2178	23	9	9.619345035	19.76662505	3	161.1622103	7180.966132	1273.171123	14.96613191	1.110808797	1.485699654	1.075240329	1.455131197
2179	25	14	10.70234085	19.80554995	3	163.3879004	7228.318505	1242.017794	15.14768683	0.958274893	1.503697999	0.968381667	1.518493557
2180	30	17	11.51584386	18.75724985	3	162.9037433	7196.695187	1232.231729	15.35650624	1.324893433	1.51447832	1.294139166	1.450025225
2181	23	14	10.70859527	19.58175011	3	163.6470588	7155.308378	1211.780749	15.93048128	1.173181877	1.430610701	1.102051431	1.389005947
2182	32	17	11.09534995	19.23736867	3	164.0124777	7134.458111	1202.327986	15.39037433	1.083382227	1.350893758	1.010556835	1.336229473
2183	31	12	10.8425438	20.15261337	3	164.4633274	7168.685152	1193.781753	15	1.193373382	1.564996116	1.122309679	1.555617231
2184	24	13	8.346775585	18.91986789	3	165.600713	7211.190731	1188.72549	15.03030303	1.220632786	1.618623251	1.215385003	1.679753447
2185	37	13	11.93476836	18.89740014	3	166.1035714	7220.571429	1192.914286	15.5375	1.174056143	1.591347374	1.199884796	1.693417239
2186	38	15	16.40179006	13.69382508	3	165.5320285	7193.896797	1221.457295	16.41992883	1.150467128	1.593453981	1.215042961	1.723810172
2187	24	14	17.06403623	11.99190487	1	168.516934	7162.901961	1226.907308	17.96613191	1.106002164	1.660324538	1.279004674	1.883484631
2188	29	13	13.56217537	13.07315006	5	170.7728086	7055.608229	1224.70483	19.38998211	1.058689728	1.617223367	1.29189465	1.849195039
2189	30	13	10.02989782	14.95449996	5	173.4543828	6972.148479	1215.366726	20.90876565	1.123548061	1.573858507	1.336370009	1.796912569
2190	19	12	7.527116436	14.67914568	5	175.5831843	6917.563506	1205.046512	22.03041145	1.187393032	1.469498642	1.389672828	1.726874977
2191	19	8	4.722223937	17.4711252	3	176.4605735	6877.482079	1194.793907	23.14336918	1.177909559	1.414755702	1.411827884	1.67583313
2192	25	7	2.691146175	16.92492417	5	176.7017857	6844.989286	1186.219643	24.35714286	1.065044362	1.457364462	1.345539331	1.646471339
2193	22	7	1.463384805	16.30652378	6	175.8924731	6833.896057	1201.34767	25.05555556	0.989555474	1.801424161	1.357546341	2.011014128
2194	40	12	1.674741724	18.43923097	6	174.9874776	6831.547406	1225.597496	25.6726297	0.946906339	1.907977432	1.273751104	2.112301749
2195	41	13	1.292367209	19.99921072	6	175.1397849	6796.173835	1250.682796	26.22580645	0.918022293	2.039141643	1.19195436	2.222023697
2196	35	19	1.253401527	19.27860019	6	176.4162162	6735.45045	1269.418018	26.58738739	0.757762592	2.158910647	1.114615119	2.29224335
2197	19	14	1.864985224	19.56052543	6	177.3035714	6651.996429	1295.783929	27.14821429	0.713666685	2.025426984	1.034064442	2.19022758
2198	14	8	3.229271582	15.17546021	4	177.1012146	6565.459514	1328.676113	27.86032389	1.169485599	1.80726143	1.323414952	1.935435408
2201	37	11	14.38648951	15.96656478	5	154.106383	7645.629433	1455.173759	19.97163121	1.86915158	1.486831909	1.845768519	1.432345942
2202	38	13	16.09127013	9.555106474	1	150.9079646	7640.074336	1462.711504	19.25663717	1.780048857	1.607488942	1.782942861	1.646820539
2203	41	12	13.82501467	10.83862157	7	150.2819149	7658.219858	1467.43617	18.72340426	1.759692568	1.662432438	1.778616391	1.731845438
2204	46	15	15.26725726	12.11070004	7	153.270318	7684.374558	1462.79682	18.17137809	1.675046104	1.743264008	1.68050234	1.817285456
2205	42	13	13.71259874	14.0342751	7	154.2411348	7681.101064	1456.856383	17.96453901	1.568295491	1.729519302	1.556389175	1.820278935
2206	38	7	9.412357885	17.89970006	7	154.3989362	7652.648936	1438.515957	17.76950355	1.389064941	1.617493496	1.311404753	1.7274041
2207	33	11	18.10378076	13.254475	7	152.141844	7625.799645	1446.847518	17.4751773	1.280216593	1.651110828	1.177695766	1.723360211
2208	31	7	19.67551038	12.51024976	7	151.535461	7610.748227	1446.475177	18.01241135	1.178324878	1.676758826	1.071038753	1.722778767
2209	38	8	18.99794671	15.81428079	3	154.1316726	7604.080071	1415.185053	18.82740214	1.002326262	1.641310108	0.894463826	1.676142454
2210	18	3	12.63095677	15.65057552	7	150.382716	7567.326279	1432.27866	19.02998236	1.096458151	1.60327177	0.984183887	1.6293607
2211	27	6	18.36236216	15.32692483	7	149.1865009	7544.024867	1439.856128	18.96092362	1.231017658	1.531446755	1.115430463	1.557654671
2212	34	14	17.99933278	13.69985805	5	149.8934281	7526.134991	1441.650089	18.69271758	1.45504294	1.711992216	1.409029864	1.782338195
2213	38	11	16.72470849	17.70943319	3	153.3539823	7508.734513	1402.853097	18.66902655	1.63619988	1.627427611	1.611484534	1.669542497
2214	36	14	17.85458777	15.55489787	7	153.4369449	7463.744227	1380.039076	18.37477798	1.713866413	1.627088457	1.638815232	1.622283265
2215	27	11	13.0497938	18.46458457	3	153.0551601	7428.19395	1355.350534	18.1227758	1.625714296	1.108259967	1.613525063	1.022238376
2216	27	12	15.2531649	17.66215918	3	152.840708	7430.2	1336.233628	17.66371681	1.481475359	0.840391937	1.520727888	0.826678501
2217	27	11	18.19145094	14.39982709	3	151.0142349	7433.122776	1375.848754	16.86654804	1.458736815	1.072561033	1.55797075	1.137476027
2218	28	6	13.72329892	18.96854625	3	149.9021352	7346.891459	1409.948399	16.19928826	1.351247513	1.041853362	1.535061501	1.156237364
2219	24	7	13.00912192	20.38145566	3	149.5238938	7243.336283	1424.249558	16	1.25396657	1.131857896	1.39197772	1.305584371
2220	27	10	13.24729665	19.1519477	3	151.7165775	7186.294118	1401.789661	15.34759358	1.20232605	1.107057738	1.366243821	1.280730516
2221	30	10	12.89164322	19.33907516	3	156.430605	7165.460854	1344.13879	14.81494662	1.173665714	1.206921798	1.306384318	1.336396024
2222	27	10	12.27886026	20.29215024	3	159.1083481	7198.145648	1308.213144	14.18827709	1.090744391	1.287096268	1.176453773	1.39469517
2223	27	8	11.55862859	19.68526314	3	160.3143872	7243.694494	1278.165187	14.25044405	1.030482104	1.409129429	1.106727105	1.443104975
2224	28	10	10.89090272	19.41709996	3	161.5311943	7232.2959	1239.623886	14.97504456	1.068050992	1.537538595	0.989623892	1.471982032
2225	37	16	9.925831218	19.65470015	3	162.3445826	7200.129663	1212.667851	15.5079929	1.074371654	1.616525501	1.008587275	1.517895475
2226	37	12	10.94711001	19.76109574	3	163.7522282	7221.418895	1193.479501	15.10160428	0.990953916	1.508621508	0.914544597	1.401734576
2227	28	12	12.25341435	15.83966359	5	164.13879	7244.163701	1184.158363	14.9252669	1.058970097	1.589549696	0.951592159	1.543849088
2228	35	15	10.09334682	19.97441921	3	163.2651246	7251.101423	1196.080071	14.62099644	1.114920957	1.627226357	1.045174888	1.642199689
2229	40	18	7.397595696	20.44252506	3	164.1352313	7266.359431	1198.791815	14.90925267	1.144535869	1.578917545	1.156751357	1.685248531
2230	23	10	7.406183437	21.27252524	3	164.0785714	7259.089286	1222.769643	15.83214286	1.173612928	1.55362255	1.247545242	1.711370826
2231	24	10	13.41810838	16.08815011	3	165.9519573	7207.302491	1231.548043	17.35231317	1.175898914	1.657266369	1.298753726	1.831377864
2232	22	12	15.19770746	12.87152498	1	169.0676157	7128.58363	1228.05516	18.99822064	1.076761943	1.559475076	1.270014793	1.774421886
2233	21	12	18.45084878	14.31155007	1	171.4081996	7070.265597	1223.078431	20.58467023	1.012736231	1.432922304	1.199369185	1.633627199
2234	51	19	15.25296661	15.21522512	1	174.3600713	7029.094474	1194.190731	21.86452763	1.024531776	1.445087236	1.228590719	1.675147578
2235	34	16	9.839882366	17.39751893	3	175.1158645	6981.969697	1174.080214	22.97682709	1.197722602	1.510021348	1.392546213	1.714917803
2236	34	14	3.769087702	16.35849232	3	174.7607143	6951.642857	1165.966071	24.06071429	1.288816106	1.588317186	1.45438765	1.709217779
2237	26	9	1.382502675	17.84402531	3	173.2517857	6932.3625	1185.401786	24.34107143	1.24711374	2.052741468	1.502533227	2.149944313
2238	22	14	1.623167412	15.66845002	2	172.7508961	6913.523297	1207.78853	24.68458781	1.140818101	2.115252972	1.376857162	2.228281036
2239	29	16	1.193566814	17.68587492	4	173.2352941	6866.56328	1235.55615	24.85026738	1.186502886	2.208985472	1.308928931	2.309534729
2240	34	14	1.265726927	18.26585026	4	174.4395018	6818.88968	1257.896797	25.46441281	0.902277032	2.239712584	1.108807728	2.344466448
2241	29	16	2.017173675	19.1424252	6	175.5420394	6752.153846	1283.915921	26.21824687	0.656320038	2.105973971	0.904355016	2.238455668
2242	21	15	1.463859971	20.18366178	4	175.6440072	6678.719141	1313.758497	26.8765653	0.763931866	1.996833086	0.909504676	2.120683634
2243	9	2	1.197688758	13.82365372	1	175.8554217	6654.560241	1319.620482	26.96987952	0.631423116	1.951845229	0.777616784	2.100135922
2245	30	11	18.08814807	17.57627226	3	153.9841549	7685.897887	1434.424296	19.55809859	1.782402888	1.633159898	1.774392456	1.586664476
2246	42	16	21.82259228	16.60372483	7	151.7918871	7672.781305	1432.419753	19.01234568	1.776877564	1.643731874	1.784249502	1.676842964
2247	44	11	14.29883691	19.54095236	7	153.9982394	7703.68662	1411.323944	18.97887324	1.753898427	1.659045279	1.791125938	1.712018423
2248	24	6	6.537121445	19.33790003	7	155.2698413	7724.109347	1419.597884	18.38624339	1.772059456	1.694573291	1.782122418	1.752412722
2249	36	9	7.291131181	19.26835028	7	154.5620567	7723.491135	1432.425532	18	1.712997675	1.676917136	1.70628804	1.747563951
2250	35	5	6.7230315	20.53958737	3	154.6690141	7722.713028	1422.841549	17.99823944	1.7051036	1.53492046	1.69476074	1.598317492
2251	36	11	8.014565733	18.38020062	3	154.7031802	7721.042403	1416.431095	18.03003534	1.56102097	1.556163609	1.567796916	1.632049114
2252	42	11	23.87241815	13.70345827	7	153.1254417	7676.183746	1423.432862	18.33038869	1.25154271	1.562542267	1.162173755	1.643388003
2253	42	12	28.45969998	14.74805713	7	153.1103203	7637.822064	1417.174377	18.79893238	1.37271712	1.6584341	1.297783583	1.715522416
2254	24	6	23.94888587	14.41265102	7	150.4920354	7593.812389	1433.095575	18.78230088	1.415493846	1.67745887	1.343749225	1.687293327
2255	20	5	9.521206739	16.79722472	7	144.8589065	7557.661376	1469.188713	18.05291005	1.508628309	1.694058374	1.461523175	1.712553106
2256	32	12	20.91605562	11.1734249	7	143.45053	7538.750883	1473.20318	17.5565371	1.538770311	1.757308818	1.530208029	1.873544589
2257	38	18	18.54055951	17.62439984	3	148.4466192	7562.951957	1422.16548	17.79181495	1.878239602	1.842986196	1.865589762	1.874414879
2258	37	11	27.94547438	16.14804049	3	149.9049296	7574.038732	1398.021127	17.84859155	1.791321926	1.726937108	1.72103139	1.739231199
2259	28	9	15.55731524	17.15677653	3	150.9662522	7535.777975	1375.122558	17.78863233	1.655255631	1.356539875	1.588214926	1.380614936
2260	33	13	13.45386231	11.64920909	7	150.2420495	7481.438163	1372.964664	17	1.569177315	1.001125589	1.56359949	0.963878199
2261	28	14	30.6036562	10.73862159	5	145.2646536	7410.021314	1455.829485	16.09769094	1.577049059	1.275709328	1.645591176	1.317138252
2262	34	15	20.22513597	11.74815005	7	146.2251773	7328.115248	1475.473404	16.11702128	1.506929494	1.168527201	1.627255037	1.220620424
2263	28	14	13.98133757	18.9749499	3	146.6170213	7237.046099	1488.521277	16.0070922	1.445959337	1.182341374	1.583148077	1.276734039
2264	21	7	13.79772174	19.97996695	3	148.8223801	7170.388988	1463.26643	15.48667851	1.196477056	1.050457072	1.388149583	1.27144013
2265	28	9	14.23956786	18.59444166	3	152.3865248	7147.95922	1414.980496	14.35283688	1.222089253	1.142896205	1.361915611	1.337345406
2266	30	9	13.17216966	20.38587983	3	156.0070796	7185.20354	1363.437168	13.96106195	1.136380024	1.18231415	1.236589424	1.416247599
2267	23	9	12.91111767	19.56345009	3	158.1953819	7230.211368	1314.788632	14.04440497	1.152909026	1.287730068	1.213736884	1.363765292
2268	27	8	11.63966061	19.68227509	3	159.0692718	7257.73357	1273.323268	14.71580817	0.966014141	1.481657958	0.916517028	1.345421666
2269	29	13	11.55792012	20.02958449	3	159.75	7259.356383	1242.478723	15.0035461	1.041691005	1.606644034	1.01406619	1.433806412
2270	32	9	9.633317017	17.71677897	3	161.927305	7292.512411	1204.641844	14.88475177	0.805990737	1.592821039	0.736956578	1.497749753
2271	43	15	9.79794954	18.16010024	3	162.0603908	7295.056838	1190.960924	14.19715808	0.841070399	1.666894011	0.712205119	1.624728724
2272	32	16	9.664073101	18.64342506	3	161.017762	7278.337478	1195.326821	13.92895204	0.815969127	1.762622243	0.599974796	1.725605375
2273	36	14	7.663197049	19.98602514	3	161.9572954	7296.562278	1201.537367	14.09786477	1.032854747	1.667564735	0.992714308	1.742957264
2274	36	15	6.743181858	21.60267531	3	163.8736655	7311.80605	1208.213523	15.25800712	1.098395649	1.588103242	1.137006454	1.702834144
2275	29	16	8.190512448	20.06027407	3	165.6174377	7258.752669	1209.770463	16.77935943	1.028513569	1.563465226	1.074769908	1.640894997
2276	30	12	10.21533458	15.72112687	3	167.3641208	7197.833037	1212.005329	18.35879218	1.001074508	1.398041412	1.125765085	1.506312579
2277	26	10	15.44488468	15.14146611	1	171.7254902	7182.108734	1194.386809	20.4973262	0.836341068	1.160861969	1.042311735	1.359427653
2278	29	11	10.54683888	17.46060771	6	172.9483066	7133.167558	1177.233512	21.48306595	0.886275887	1.301532455	1.063804276	1.571897417
2279	36	13	11.90503907	17.0212313	5	172.6198934	7074.53286	1159.82238	22.45648313	1.249094611	1.577262914	1.331181437	1.721025807
2280	39	13	4.315061619	16.2365161	3	172.6386404	7049.518784	1157.706619	23.86583184	1.524225421	1.785126537	1.546584472	1.800475203
2281	24	11	1.354223081	18.10609013	4	171.8809947	7012.618117	1175.071048	23.86145648	1.294967912	1.980502851	1.395487659	2.056368254
2282	30	12	1.362370156	17.21387486	2	171.7330961	6991.357651	1190.825623	24.00533808	1.046109643	2.155592114	1.199098743	2.24753435
2283	29	10	1.329797961	18.36577481	4	171.9767442	6958.085868	1213.060823	24.11091234	0.992260021	2.304797995	1.032710871	2.313921726
2284	32	10	1.534856717	17.82897504	4	173.1176471	6916.720143	1237.914439	24.95900178	0.712559707	2.124433756	0.841861937	2.223853856
2285	27	12	1.292402596	18.17820018	4	173.9731664	6852.137746	1267.314848	25.59928444	0.529419282	2.014691532	0.740293439	2.132381707
2286	41	16	0.345598058	17.99030004	6	174.2696429	6796.467857	1294.025	26.47678571	0.517359306	2.045782852	0.738216048	2.093410182
2287	23	10	0.93517232	20.5011286	4	173.9026549	6765.962389	1300.519912	27.61725664	0.374711705	1.862670213	0.606560082	1.970203737
2289	36	7	17.20631643	17.35281801	3	153.8904594	7734.422261	1420.287986	19.04416961	1.716405086	1.610160314	1.698177859	1.595152922
2290	30	7	8.084261866	21.50281253	3	154.4063604	7714.865724	1399.793286	19	1.741751093	1.684369117	1.764419216	1.714570999
2291	30	4	7.482965285	20.20240209	3	155.2504409	7747.767196	1386.283951	18.95061728	1.745231107	1.702853054	1.804458655	1.753072195
2292	17	4	7.389323577	21.91873114	3	154.4310954	7753.710247	1401.210247	18.31272085	1.821900018	1.707872413	1.841121048	1.750453852
2293	33	6	7.492980417	21.59709012	3	153.5940246	7754.191564	1417.323374	18	1.790869266	1.697467275	1.789524943	1.749378279
2294	21	5	3.320156874	21.58249993	3	152.5590829	7763.241623	1424.624339	18	1.786491597	1.649729139	1.779708332	1.699218136
2295	26	5	7.110079071	21.73402018	3	152.2920354	7769.123894	1421.20708	18.04424779	1.706368864	1.664602973	1.720978707	1.728006572
2296	26	5	21.37878624	16.54710002	3	151.4295775	7714.552817	1423.97007	18.10915493	1.53941264	1.719332449	1.513160974	1.796101697
2297	43	14	39.17678551	10.08662498	7	148.6865149	7660.942207	1446.963222	18.30297723	1.679670215	1.779491968	1.680436179	1.8394254
2298	39	10	29.07290613	11.53450542	7	150.3681416	7619.743363	1437.684956	18.76106195	1.544049186	1.642559451	1.531911707	1.632213676
2299	28	10	15.11539567	16.62075171	7	144.0283688	7595.725177	1478.462766	17.82092199	1.550203465	1.695899643	1.537533566	1.717262805
2300	25	8	17.1559017	12.58442485	7	140.3697183	7582.816901	1490.669014	16.94366197	1.568491057	1.714684926	1.584224276	1.800910518
2301	39	16	24.80230681	14.49589996	3	140.0827465	7602.401408	1485.359155	16.48415493	1.861213011	1.845156652	1.877553362	1.857534629
2302	33	17	24.57444989	17.35904985	3	146.8312611	7647.019538	1420.108348	16.80461812	1.81024383	1.609781362	1.807386801	1.638404571
2303	38	15	21.18090794	15.14739113	7	148.221831	7611.705986	1401.350352	16.36795775	1.664768934	1.304653585	1.640445925	1.369763441
2304	24	9	10.89611145	11.16227026	7	149.8477876	7546.897345	1393.881416	15.67256637	1.685974248	1.349814624	1.748208009	1.445888206
2305	33	11	23.88822367	9.329717202	7	142.6719577	7416.848325	1500.144621	15.18342152	1.655703712	1.547909963	1.729512823	1.637882364
2306	29	15	32.9106993	11.20327495	7	134.3156966	7269.86067	1598.128748	14.6984127	1.629125021	1.633375764	1.715874173	1.732666798
2307	26	14	18.36334981	17.96195004	3	139.4751773	7204.242908	1581.824468	15.4822695	1.553312652	1.479821682	1.626375161	1.491698049
2308	26	12	18.82286846	16.33516536	3	143.7738516	7132.787986	1556.5053	15.13780919	1.409809422	1.392276257	1.492440355	1.454977423
2309	33	12	16.52455735	18.69724322	3	145.0265018	7075.881625	1534.30742	13.85689046	1.286992811	1.229412176	1.36918506	1.362292014
2310	32	14	16.20299482	18.90710031	3	151.5815603	7130.074468	1441.769504	13.40248227	1.202789746	1.134603068	1.241063014	1.234666355
2311	31	12	11.66546059	19.61612533	3	156.4529307	7209.470693	1358.193606	13.80106572	1.36176426	1.194542848	1.412806228	1.236262627
2312	25	11	11.67520401	20.07767704	3	156.8430335	7277.421517	1330.525573	14.07760141	1.217608708	1.357515013	1.207658482	1.239057401
2313	24	8	8.593712418	20.27433872	3	159.7358156	7351.019504	1261.968085	14.81382979	1.004345842	1.497208357	0.943670932	1.351933517
2314	31	12	11.13557259	18.08720842	3	159.7712766	7343.189716	1224.650709	14.10283688	0.812941037	1.635719381	0.694647297	1.552650504
2315	38	14	8.563464033	17.9374254	3	159.8619469	7334.743363	1209.132743	13.37876106	0.80947997	1.713398606	0.676615585	1.672277823
2316	37	13	10.24531864	14.56873693	3	159.7783688	7319.618794	1199.210993	13.03900709	0.828697732	1.74202913	0.692181385	1.717887092
2317	20	13	9.793791742	16.23536798	3	160.54947	7324.826855	1199.139576	13.22261484	0.913841587	1.70876386	0.840654857	1.714660138
2318	33	13	9.604766067	19.9957036	3	162.0302491	7318.758007	1204.122776	14.26156584	0.885210749	1.693587929	0.925474919	1.727584258
2319	34	15	12.0403119	19.40543573	3	163.2477718	7284.2959	1203.531194	15.81996435	0.884347239	1.57776137	0.858415318	1.545187765
2320	37	14	11.99961461	18.34623217	3	165.316726	7265.071174	1188.476868	17.17081851	0.961220056	1.407133959	0.988858297	1.383211851
2321	43	12	15.87314706	19.740025	3	167.8457447	7249.870567	1180.719858	18.74822695	0.950819924	1.322243832	1.05835703	1.332872428
2322	25	8	16.71333049	11.9317883	1	167.7122558	7180.550622	1174.31794	19.64831261	0.81211213	1.344417825	0.825959779	1.533274204
2323	26	9	9.756252496	17.22033865	5	168.9592199	7115.092199	1142.93617	21.21985816	1.01050964	1.530797559	1.006769133	1.629141146
2324	22	10	8.558106277	17.1393214	3	169.0644007	7116.087657	1151.667263	22.37924866	1.167708702	1.755545869	1.199124347	1.864276625
2325	27	8	0.649141812	19.11130305	4	169.9165187	7093.802842	1163.708703	22.69449378	0.970250823	1.801156312	1.051109508	1.948703222
2326	26	11	0.931372302	19.05102493	4	170.3985765	7077.160142	1174.024911	23.45907473	0.762057267	1.954337254	0.915608663	2.104175001
2327	18	12	1.095903462	16.60447495	4	171.5417407	7051.349911	1183.989343	24.25577265	0.57842233	2.051983911	0.738287088	2.120433974
2328	29	12	1.047389224	17.02879984	4	172.2196429	6998.860714	1213.785714	24.75892857	0.432460438	1.99895601	0.626327608	2.126332983
2329	36	16	0.411505606	19.18722518	6	172.8579041	6942.818828	1246.809947	25.14387211	0.375136205	2.031791396	0.590547506	2.159756869
2330	25	14	0.88228113	17.45428561	6	172.9910714	6905.378571	1273.5625	26.33214286	0.447026567	2.107880747	0.663627049	2.117699933
2331	27	11	0.781162413	16.47461151	6	172.3149466	6857.962633	1287.330961	27.57651246	0.422621324	1.931274645	0.621568048	1.970675342
2332	20	8	1.66268718	14.49972875	2	171.140884	6813.632597	1302.754144	28.00828729	0.281156681	1.778802729	0.441104455	1.887173152
2333	31	7	19.09421924	14.35054946	3	150.6338028	7779.723592	1432.651408	18.75352113	1.715072453	1.633782424	1.685628194	1.650693578
2334	28	4	12.13928115	19.27304174	3	148.8896673	7737.525394	1430.78634	18.40630473	1.750391632	1.724524283	1.737351336	1.755497952
2335	33	10	13.74773875	17.64004008	1	150.2821869	7739.529101	1411.950617	18.21164021	1.752705649	1.789381303	1.745357829	1.823686475
2336	33	8	9.332603041	19.00648933	6	150.0577933	7752.224168	1416.774081	17.99474606	1.783974156	1.863595277	1.762057936	1.91725772
2337	30	7	14.6892007	19.86465749	3	150.3045775	7769.818662	1423.047535	17.94014085	1.799379312	1.829764545	1.779695916	1.885002732
2338	31	5	8.954940267	20.16284826	6	149.7830688	7782.31746	1428.850088	17.88183422	1.838702637	1.750840157	1.825616903	1.785874405
2339	31	4	5.704416568	21.04804293	3	148.3286467	7773.83304	1431.268893	17.88400703	1.816345111	1.732670397	1.812964141	1.772397894
2340	17	4	11.21405573	19.83557494	3	148.5636042	7736.959364	1425.964664	17.98586572	1.731412098	1.793474793	1.741418475	1.858211994
2341	44	13	50.67402185	7.312025038	7	142.8820423	7682.184859	1483.954225	17.53169014	1.818233036	1.812011205	1.840024215	1.864804816
2342	38	16	42.10753524	8.871175073	7	141.8721541	7650.166375	1501.217163	17.5323993	1.762135154	1.742740846	1.8004286	1.76629406
2343	36	9	25.81330255	13.32283232	7	147.2186949	7648.631393	1456.405644	17.87830688	1.689181291	1.736739151	1.731861532	1.775932616
2344	36	11	25.54660518	11.89560907	7	140.4197531	7644.239859	1491.356261	16.76895944	1.68049679	1.775951385	1.720595944	1.819224399
2345	31	10	26.71893616	15.24294998	3	141.3932981	7674.772487	1465.929453	16.45679012	1.548250571	1.56001678	1.469467345	1.43204177
2346	38	12	19.70856848	15.53824106	3	146.1325088	7717.487633	1415.45053	16.38515901	1.408080693	1.240260269	1.265748754	1.060699192
2347	21	8	18.49743241	13.81734383	7	147.8362676	7687.049296	1411.330986	15.22007042	1.566140845	1.45641008	1.652973771	1.640470374
2348	31	12	19.02844864	12.0189672	7	144.5547703	7569.365724	1451.174912	14.18021201	1.720611699	1.602013864	1.836140281	1.801357728
2349	30	16	26.82064689	7.672874984	7	136.443662	7406.698944	1557.325704	14.19542254	1.615396965	1.590174633	1.735812311	1.761737165
2350	43	20	34.7860301	11.23117499	3	128.3716814	7257.272566	1634.038938	13.79823009	1.683903761	1.806819305	1.777589482	1.914970219
2351	25	14	38.9217761	16.3619998	3	124.7623239	7136.042254	1681.207746	13.29753521	1.541012697	1.864486642	1.630986381	1.91260466
2352	33	18	33.80742259	17.15069998	3	130.7301587	7056.269841	1672.962963	13.42680776	1.509848112	1.624688917	1.658803144	1.759574676
2353	25	14	20.64591495	18.49125002	3	139.4707965	7012.739823	1631.297345	13.34336283	1.4535482	1.415991284	1.602509791	1.61930114
2354	33	14	17.87160488	18.57705014	3	143.6289753	7034.897527	1577.249117	12.45759717	1.219549727	1.262549356	1.271703097	1.386737251
2355	30	14	14.70633119	19.6388331	3	153.9875887	7166.636525	1430.182624	12.94326241	1.13569909	1.150152177	1.165954098	1.207081997
2356	31	8	12.03749478	19.58734842	3	155.9241623	7249.75485	1375.320988	13.28747795	1.195106286	1.286117238	1.180418711	1.263310361
2357	17	8	9.972866821	18.86116022	3	158.4805654	7338.946996	1295.210247	13.71378092	0.893685285	1.500445001	0.849038342	1.443000191
2358	28	10	10.48778284	17.35045258	3	158.1486726	7362.099115	1257.670796	13.2920354	0.830652714	1.669378906	0.724634853	1.660552227
2359	34	14	10.64620186	17.47581485	3	158.3510638	7381.441489	1234.005319	12.9822695	0.821148571	1.720616907	0.707660085	1.678631473
2360	38	13	13.91882898	16.48230001	3	158.500885	7368.59469	1213.716814	12.42300885	0.852760968	1.713266474	0.722947948	1.651882782
2361	28	11	10.59996907	16.73767523	3	158.0265957	7345.16844	1217.046099	12.4822695	0.87994336	1.675199814	0.736661556	1.57979933
2362	29	15	12.16137674	17.74092504	3	159.5220459	7331.479718	1216.767196	13.52380952	0.81841429	1.586895838	0.763232183	1.483892173
2363	27	14	12.87209163	18.6478196	3	161.5691489	7329.66844	1200.946809	14.95567376	0.712832327	1.381304735	0.655187294	1.293154073
2364	31	16	15.74894403	17.78947894	3	162.5699115	7328.824779	1184.095575	15.98584071	0.870211355	1.333818585	0.895947522	1.327928394
2365	33	15	15.85998869	17.78060157	3	163.427305	7308.617021	1177.024823	17.00531915	0.887368716	1.271887541	1.016487125	1.322499454
2366	30	16	17.05589352	18.96966936	3	163.6914894	7212.152482	1153.200355	18.20921986	0.679650618	1.27592475	0.575139324	1.210111782
2367	25	11	11.57026285	15.81826526	3	164.3989362	7133.83156	1129.526596	19.34929078	0.736052974	1.37377432	0.518311445	1.248937888
2368	27	11	9.736421587	14.87474999	1	165.1613475	7165.819149	1149.737589	20.13652482	0.75563474	1.531939112	0.72152286	1.726602393
2369	27	8	1.746748263	18.11027767	4	167.2468917	7167.829485	1157.40675	21.23978686	0.590071797	1.585209586	0.667174569	1.826692683
2370	20	10	0.922740894	19.08172523	5	169.0373665	7153.379004	1163.199288	22.75088968	0.410894852	1.795454599	0.656446747	2.034370857
2371	19	10	1.221856044	18.31154993	3	170.7109929	7135.971631	1161.608156	24.19148936	0.075255948	1.782367688	0.471684083	2.059345503
2372	34	15	1.253948055	18.35129996	6	171.1811723	7094.515098	1197.108348	24.12433393	0.12226607	1.846823268	0.356080815	2.062490082
2373	25	12	0.567097824	18.40177958	2	170.2184725	7035.483126	1238.104796	24.38188277	0.052109185	1.944205821	0.202134107	2.109016764
2374	26	15	0.821187444	15.23722506	2	169.0690265	6987.851327	1260.054867	25.44070796	0.438199256	2.11601994	0.540127472	2.16302968
2375	22	9	0.593888782	16.58607226	2	169.4071429	6934.657143	1265.771429	26.81071429	0.677303962	1.88569247	0.725119409	1.939116901
2376	18	6	0.703368704	17.80526625	4	169.5062167	6873.630551	1291.213144	27.70159858	0.53281424	1.790412225	0.635663337	1.861008751
2385	22	3	22.89560464	6.046792462	7	143.3585237	7716.794376	1467.253076	17.29173989	1.750711882	1.836742622	1.764379196	1.869205512
2386	29	5	47.95092353	5.493888934	7	138.403169	7688.237676	1522.65493	16.7306338	1.796265059	1.81184411	1.825169122	1.825569147
2387	33	5	45.27700764	9.514883718	7	141.0789474	7685.935088	1501.038596	16.80175439	1.814922005	1.807749122	1.843465254	1.820003234
2388	32	8	30.95628623	13.7890445	3	143.4077329	7705.323374	1463.790861	16.61511424	1.69858014	1.72525183	1.696006022	1.65004275
2389	34	6	34.34317902	15.65601935	3	144.4630282	7744.704225	1432.714789	16.58274648	1.496337841	1.632569304	1.621945351	1.644081929
2390	29	7	19.25915296	15.89140063	3	148.2719298	7784.263158	1388.633333	16.44035088	1.219855222	1.130471143	1.326253399	1.170957118
2391	21	7	15.20168921	15.19830086	6	146.6672535	7720.107394	1412.598592	14.91725352	1.56412155	1.548192078	1.643587604	1.651598014
2392	37	11	21.30758778	14.90002996	3	141.0615114	7586.239016	1474.72935	13.9086116	1.72076984	1.714659852	1.784489363	1.805200517
2393	36	15	38.38364255	14.52586958	3	124.295053	7364.319788	1628.918728	13.33922261	1.805174918	1.98667357	1.85479427	2.051412994
2394	27	11	28.46547245	15.72571444	5	130.5571178	7291.606327	1575.525483	13.89279438	1.773623145	1.907072997	1.847086146	1.938043773
2395	28	14	34.18857127	19.24664981	3	125.3093146	7163.648506	1620.260105	13.0456942	1.733075708	1.702704304	1.884173907	1.728529967
2396	30	15	45.04815752	17.067525	3	121.2208481	7030.09894	1710.174912	12.21908127	1.733733644	1.623217816	1.898593706	1.684400862
2397	33	16	39.19233721	15.50981992	1	125.346831	6947.448944	1758.975352	11.81161972	1.606966591	1.67002449	1.672096141	1.755294055
2398	28	13	36.0954455	15.19154035	3	134.8380282	6962.929577	1712.098592	11.29929577	1.375208747	1.484939438	1.375098407	1.537345946
2399	36	15	26.33663827	19.7717495	3	144.790493	7069.036972	1591.551056	11.14260563	1.470224559	1.270548767	1.513109699	1.359173529
2400	26	10	11.77979541	19.52939669	3	152.8906526	7188.178131	1469.010582	11.82716049	1.368159981	1.179762168	1.390452832	1.227891922
2401	28	6	12.74391184	19.16682446	3	156.1254417	7281.717314	1380.431095	12.31625442	1.068225187	1.407455254	1.057525352	1.444652498
2402	25	10	9.64301103	19.18852171	3	157.0070547	7360.213404	1316.557319	12.54497354	0.811227909	1.665525132	0.771011733	1.685561933
2403	31	12	10.23037935	17.78975025	3	157.6666667	7425.693122	1259.844797	13.21164021	0.692760748	1.651872271	0.615112608	1.639185399
2404	25	11	11.54348606	18.47655012	3	157.2614841	7409.245583	1233.579505	12.25971731	0.671648933	1.6076436	0.51623491	1.463122821
2405	38	15	14.37902858	15.52400009	3	156.8303887	7371.510601	1227.303887	12.13074205	0.769537053	1.555569035	0.575582903	1.365953416
2406	38	18	14.84289197	15.10707522	3	157.8922261	7347.25265	1225.397527	13.0795053	0.720366406	1.324216068	0.615933372	1.171156392
2407	37	17	14.34229437	15.54639102	3	159.5897887	7363.517606	1209.167254	14.15669014	0.747940705	1.195427663	0.724830475	1.086670351
2408	33	16	15.16769047	15.35094969	5	159.565371	7369.759717	1199.438163	14.87632509	1.046377245	1.250617498	1.027719203	1.084290497
2409	38	18	14.82332347	12.40934663	5	161.2730496	7353.439716	1174.452128	16.08156028	0.897907719	0.905538204	0.884872694	0.719836429
2410	36	16	14.72267652	16.58768351	3	161.5852373	7270.230228	1149.151142	17.17223199	0.927212343	0.990042877	0.85653441	0.917805855
2411	28	16	14.28435546	12.88725004	1	160.4937833	7205.786856	1150.529307	17.48667851	1.113138529	1.553196673	1.045841412	1.75118503
2412	34	15	12.04008993	11.88030011	1	162.5833333	7217.106383	1155.85461	18.58333333	0.840961608	1.615103823	0.84654161	1.795685634
2413	11	6	10.46442936	15.14200022	5	164.539823	7234.224779	1166.292035	19.98761062	0.563361013	1.709240121	0.677790549	1.896054491
2414	30	11	1.752915298	17.8163161	5	167.3321555	7235.224382	1165.238516	21.66784452	0.327023076	1.82878924	0.735140067	2.092554837
2415	34	13	2.510181375	18.78595477	6	169.5861456	7207.044405	1159.634103	23.23268206	0.182415573	1.944881711	0.495992804	2.182358515
2416	33	14	0.686254891	20.29247507	6	169.3790036	7173.313167	1182.370107	23.45907473	0.030527555	1.89999491	0.097659131	2.107724115
2417	29	13	0.976238762	18.35592506	5	167.7282416	7116.900533	1215.872114	23.76731794	-0.024646972	1.898848248	-0.00277749	2.051850572
2418	16	10	0.613493666	15.57734762	2	166.3647687	7055.540925	1237.747331	24.62811388	0.234588091	2.005134158	0.281834149	2.077371907
2419	22	3	0.713851047	18.16371431	3	166.6276596	7002.230496	1250.140071	25.85460993	0.472299168	1.996271181	0.508991389	2.043391094
2438	10	2	29.96016001	15.74800018	5	129.4745167	7328.910369	1546.776801	13.8629174	1.783285029	1.874370493	1.856484644	1.957107171
2439	21	6	25.85604257	18.74616192	3	129.7173145	7232.85689	1536.312721	13.76855124	1.837544054	1.898737893	1.916567065	1.97375305
2440	13	3	32.46440662	20.75626772	3	126.0982456	7086.77193	1617.554386	12.92807018	1.821943301	1.755992925	1.940914965	1.849276125
2441	28	9	44.07860291	19.27454971	1	114.6684211	6929.022807	1819.249123	10.89649123	1.802532524	1.726625726	1.863559313	1.779068619
2442	28	12	44.64232849	18.22392731	1	119.4638448	6882.599647	1854.396825	10.13756614	1.603799827	1.580727175	1.659461185	1.624285564
2443	29	15	36.05320986	16.78717173	3	130.6982456	6964.131579	1789.95614	9.58245614	1.70159132	1.509305976	1.740972914	1.560339257
2444	26	13	20.57251965	19.13564982	3	148.4638448	7148.544974	1568.890653	10.58906526	1.644049412	1.4103787	1.644986635	1.450634944
2445	40	17	21.66197434	17.99032596	3	151.7820738	7218.335677	1498.221441	10.58699473	1.32666932	1.453870066	1.347771011	1.486466676
2446	30	10	12.6875623	18.47067862	3	154.8924162	7333.257496	1397.617284	11.55908289	1.132691003	1.27586928	1.176741201	1.351611421
2447	25	5	12.56583586	17.96045135	3	156.2261484	7425.139576	1306.948763	12.66607774	0.572173882	1.203138251	0.540351324	1.279842414
2448	24	11	13.10550257	17.73205531	3	156.8978873	7438.737676	1252.542254	12.03169014	0.669009994	1.388488686	0.585402676	1.295378339
2449	33	13	15.56164048	14.88777501	3	155.8218695	7404.640212	1242.446208	11.94885362	0.822637774	1.443836331	0.726165485	1.296767704
2450	43	13	16.10406241	19.22127533	3	155.3180212	7370.270318	1238.35159	12.14840989	0.859396227	1.305472195	0.785114259	1.14281486
2451	35	18	14.46359824	14.44341698	5	157.1234568	7385.811287	1213.495591	13.12345679	1.052742735	1.210085899	0.993708876	0.987552321
2452	36	16	12.12524934	14.05717486	5	157.2667845	7407.141343	1208.964664	13.8975265	1.423608638	1.227128372	1.322629377	0.934754942
2453	34	13	12.16298587	16.40188118	3	158.7597173	7399.427562	1186.160777	15.0229682	1.089837383	0.942611933	1.121586628	0.825472053
2454	30	10	11.03486282	17.52690338	3	157.6783831	7325.003515	1179.961336	15.4745167	1.1109193	1.09700105	1.151290279	1.148249231
2455	39	15	15.57672293	15.57114991	3	157.6619217	7266.875445	1176.669039	16.04092527	1.349343997	1.624057978	1.408346891	1.842094499
2456	30	16	15.37795371	11.44815018	1	160.1493849	7283.147627	1171.44464	17.43760984	0.981425438	1.602797225	1.104343988	1.807844527
2457	24	13	15.66326528	10.76776952	1	162.7021277	7302.930851	1176.039007	18.9858156	0.57951818	1.571335889	0.679258715	1.712055571
2458	31	15	8.011283582	15.33295011	1	166.0159574	7306.434397	1169.466312	20.68085106	0.247327634	1.597035922	0.392381663	1.720416918
2459	36	15	1.395561234	21.02369346	6	167.6296296	7289.904762	1163.513228	21.92416226	-0.036549387	1.73958317	0.029259211	1.83335762
2460	21	16	0.9359001	19.23641596	6	166.459364	7255.85689	1174.849823	22.51236749	-0.204445355	1.836546294	-0.267543632	1.916087359
2461	13	4	0.64430861	16.7552171	5	165.0742049	7189.547703	1195.339223	23.11660777	-0.086346622	1.871359542	-0.095192241	1.973159216
2488	18	4	40.82390306	15.45542851	3	125.3403509	6982.145614	1865.847368	8.266666667	1.727499712	1.557134807	1.770190053	1.631289072
2489	32	11	39.53840337	13.79895827	3	134.6502636	7102.458699	1734.207381	8.390158172	1.555876069	1.484464586	1.560319179	1.561716396
2490	30	12	24.21781156	16.57292514	3	150.5473684	7281.729825	1463.564912	9.701754386	1.349199645	1.240746155	1.425250673	1.329887933
2491	21	5	14.15452284	17.56785386	3	153.7298246	7359.124561	1376.97193	10.32105263	0.931260534	1.220823817	1.000702229	1.311715156
2492	20	4	12.44280143	17.44866866	3	154.3427065	7404.664323	1309.465729	10.75746924	0.944924456	1.338580894	0.937645535	1.221910989
2493	42	12	16.02545657	17.15655017	3	154.0579965	7408.010545	1270.45167	10.81195079	1.057840288	1.362181731	1.030977991	1.172817785
2494	41	16	15.69781706	17.05079996	3	153.9894366	7387.454225	1245.512324	11.17605634	1.184424765	1.247728482	1.150364953	0.95338096
2495	31	12	14.47153621	15.18132488	3	154.8867257	7410.538053	1220.810619	12.10619469	1.152367163	1.143393904	1.154749548	0.884026165
2496	29	6	9.016638521	18.19719303	3	155.8105263	7451.394737	1210.810526	13.00526316	1.058467481	0.956592362	1.268670893	0.963768837
2497	34	14	10.7258629	18.12628865	3	157.0807018	7457.187719	1190.861404	13.84385965	1.105562907	0.930315819	1.394179618	1.033226267
2498	35	11	10.13113968	21.53761705	3	156.1077739	7379.547703	1181.128975	14.3639576	1.222129785	1.170085438	1.449464929	1.255912995
2499	36	6	9.057353646	15.76177421	3	155.7989418	7324.128748	1183.444444	15.10758377	1.293334508	1.469709694	1.58583003	1.65454875
2500	32	13	10.13888493	12.63394149	1	158.4081272	7347.946996	1181.79682	16.50706714	1.078364838	1.577459261	1.298283002	1.758460289
2501	24	12	8.001880048	13.07697003	5	162.1940035	7386.64903	1177.197531	18.23280423	0.603275951	1.437451847	0.719208987	1.547751164
2502	36	12	8.029135727	17.30397475	5	164.6766257	7390.513181	1175.843585	19.71001757	0.023763407	1.418167613	0.070783502	1.507871103
2503	19	9	3.17447739	20.53628108	3	165.1047957	7362.264654	1172.714032	20.76909414	-0.673553361	1.276314065	-0.734536191	1.229916954
2504	10	3	1.617930743	17.3845968	3	164.5539823	7330.293805	1179.20354	21.7840708	-0.139517446	1.564153939	-0.178908504	1.529685116
2534	21	3	45.29057437	11.31440006	3	129.6982456	7130.926316	1560.908772	8.09122807	1.309891216	1.380662002	1.349124603	1.466430284
2535	25	8	33.77123143	14.9383337	3	145.2438596	7260.7	1447.966667	8.775438596	1.086015675	1.207132243	1.241801936	1.315951839
2536	23	5	17.05584326	16.79176505	3	151.4551845	7357.105448	1352.189807	9.291739895	1.082692578	1.099301416	1.064245039	1.049920639
2537	29	9	14.92494768	19.40310105	3	150.9736842	7381.978947	1305.642105	9.78245614	1.230482884	1.260563463	1.225399196	1.131995365
2538	32	11	16.44403041	18.861702	3	151.4378284	7387.705779	1265.702277	10.42381786	1.333247095	1.280221142	1.336300187	1.078700822
2539	38	13	15.44269503	15.79228113	3	152.1558669	7419.593695	1232.730298	11.18038529	1.220365286	1.004838541	1.272517413	0.751186576
2540	38	14	10.13917554	17.98468751	3	154.7112676	7487.012324	1201.616197	12.08626761	1.114375561	0.887158629	1.350855432	0.733839653
2541	27	9	10.39206975	17.64035849	3	156.228471	7518.256591	1173.274165	12.80843585	1.234864876	1.031839527	1.565042205	1.008630194
2546	10	2	12.78731414	14.60090906	5	161.7495591	7465.246914	1187.426808	18.59259259	0.401497195	1.770434298	0.462980069	1.772724383
